# Supplementary material for: Genome-Wide DNA Methylation Analysis of Mammary Gland Tissues From Chinese Holstein Cows With Staphylococcus aureus Induced Mastitis
Source: Front Genet. 2020 Oct 19;11:550515. doi: 10.3389/fgene.2020.550515 (PMC7604493; doi:10.3389/fgene.2020.550515)
Supplement: Supplementary file 5 [file Table_5.XLSX]

## Sheet: TableS5a_DMG_CCGG
TableS5a: Differentially methylated CCGG genes between the SA and CL groups
Gene	A2-RPM	B3-RPM	C4-RPM	A1-RPM	B1-RPM	C1-RPM	log2FC	PValue
2019-09-04	10.72	8.93	12.13	2.45	3.66	2.35	1.85902	1.04661e-07
AASDHPPT	5.35	5.17	5.6	2.95	1.37	2.83	1.14468	0.00942041
ACADVL	18.74	15.51	20.54	4.92	10.97	10.87	1.00137	0.000146042
AES	5.8	5.64	7.46	1.97	3.66	2.82	1.1134	0.00537107
AHR	4.46	3.29	2.81	2.46	1.83	0.47	1.11447	0.0379328
ALX1	0.45	0.47	0	2.95	1.83	1.88	-2.65068	0.00418439
APRT	3.12	3.76	6.07	0.49	3.66	0.47	1.40285	0.01721
ARHGDIB	0.89	2.82	1.41	3.93	3.2	5.2	-1.27033	0.02243
ARL1	0.89	0.94	0.93	2.95	2.29	3.78	-1.6599	0.0146482
ARPC5	9.37	11.28	5.61	4.42	5.49	2.83	1.01057	0.0110955
AS3MT	4.03	2.82	2.8	0.49	2.28	0.94	1.29517	0.0245572
ASIC5	8.94	12.69	8.41	2.45	5.49	6.14	1.05118	0.00237264
ATP5SL	2.24	3.29	4.68	7.38	5.03	8.02	-1.01343	0.0142471
AURKC	4.03	2.82	1.87	0.49	0.91	1.41	1.54744	0.0156371
BAG5	2.23	5.64	4.66	0	1.37	2.36	1.65741	0.00527378
BHLHE23	1.35	1.41	0.47	5.4	5.94	8.03	-2.54469	4.82254e-07
BLOC1S3	1.79	4.7	5.6	2.94	0.46	0.94	1.43192	0.0185829
BOLA-DMB	3.57	9.4	3.27	12.79	8.23	12.28	-1.05184	0.00518792
BZW1	3.13	4.7	4.2	0.49	2.29	0.94	1.59832	0.00297569
C13H20orf195	4.47	4.23	5.14	1.96	1.83	1.89	1.23822	0.0115284
C16H1orf233	4.46	7.99	5.61	3.93	2.29	1.42	1.20774	0.0125053
C19H17orf100	10.73	8.46	7	3.93	4.12	4.24	1.06301	0.00291665
C19H17orf50	1.79	2.35	2.81	0.49	0.46	0.94	1.75797	0.0192245
C19H17orf78	3.57	2.35	1.87	0.49	1.83	0.47	1.39054	0.0370041
C1QL3	0.9	0.94	1.4	4.42	4.11	1.88	-1.65797	0.00975616
C25H16orf54	0.45	6.58	1.4	6.39	9.15	7.55	-1.47158	0.00706841
C3H1orf52	2.67	5.64	3.27	0.49	2.74	1.42	1.23763	0.0269354
C8H8orf58	12.49	7.05	13.09	2.94	6.4	6.14	1.04037	0.00394668
CALR	2.23	2.35	3.27	0	0.46	0.94	2.30946	0.0025798
CAPN11	9.38	10.34	10.75	1.96	3.2	5.17	1.51129	1.457e-05
CAPS	3.57	2.82	7.47	0.98	1.84	3.3	1.12856	0.045815
CBX6	20.53	12.22	20.08	7.38	6.41	11.79	1.02474	0.000424437
CCDC106	0.45	1.88	2.33	3.93	2.29	5.66	-1.34781	0.020033
CCDC121	6.7	7.52	3.27	0.98	2.74	4.72	1.0086	0.0438064
CDC42	5.36	2.35	5.15	0.49	2.3	1.88	1.39528	0.0131419
CDC42EP5	4.03	3.76	5.14	1.47	0.46	1.88	1.70367	0.00119614
CDC5L	6.7	8.93	8.41	4.91	3.2	2.83	1.10596	0.00300197
CDH13	4.01	3.76	4.2	0	1.82	1.89	1.59826	0.00294083
CHCHD2	5.35	3.29	5.14	2.46	1.83	1.89	1.12604	0.0195517
CKB	10.28	5.17	8.89	2.95	3.2	1.88	1.55964	0.00020182
CLEC14A	2.23	1.88	4.67	5.9	8.23	6.61	-1.25232	0.00252469
CLECL1	1.78	2.35	1.4	3.94	3.2	7.08	-1.35285	0.0102269
CNN3	9.37	5.17	10.28	2.95	0.92	5.67	1.35301	0.00478901
CNPY2	6.69	3.29	8.42	2.95	2.29	2.83	1.15674	0.0120903
COMMD9	4.02	2.82	2.33	0.98	0.46	2.36	1.22559	0.0393051
COMTD1	2.69	2.82	5.13	0.49	1.83	0.47	1.81939	0.0033271
COPS8	1.78	1.41	1.4	4.42	3.66	3.78	-1.34729	0.016697
COPZ2	1.78	2.35	2.81	0	0.46	0	3.43331	0.000519387
CTGF	9.38	5.17	7.01	0.49	5.03	3.78	1.16531	0.0127618
CUTC	3.13	4.7	2.8	7.87	12.8	7.08	-1.39881	0.000289346
CXCR1	20.12	19.7	29.23	60.77	51.7	64.5	-1.33397	1.19106e-16
CYP26A1	0.45	1.41	0	2.46	2.28	2.82	-1.95945	0.011828
CYP27B1	2.24	2.82	1.4	3.43	5.94	5.19	-1.18306	0.0173048
CYR61	6.69	8.93	8.4	1.47	1.84	4.25	1.62048	5.1012e-05
DBNDD2	4.46	2.35	7.01	1.97	1.37	2.83	1.12452	0.0381932
DCAF13	2.23	2.35	1.87	0	0.91	0.47	2.03614	0.0127348
DCN	4.9	6.58	4.2	2.46	1.84	2.83	1.10332	0.0135151
DFFA	4.91	6.11	5.61	1.97	0.92	4.24	1.18476	0.0100752
DLX4	4.02	5.17	5.61	1.96	1.38	2.35	1.3302	0.0054136
DNAAF3	2.69	2.82	3.27	0.98	0.46	0.47	2.09143	0.00260295
DND1	9.81	5.64	14.95	3.44	4.57	6.6	1.02392	0.0125695
DOK2	1.79	4.7	0.47	7.85	4.59	3.29	-1.18092	0.0462637
DTX3	4.47	2.82	6.09	1.97	1.83	1.88	1.18965	0.0202196
DUSP18	7.14	3.29	7.02	1.47	2.74	2.82	1.262	0.00745853
DUSP8	4.03	4.23	4.67	13.25	8.69	8.01	-1.22007	0.000564237
ECM2	5.8	5.64	4.2	1.97	2.75	2.83	1.01237	0.0213329
ECSCR	3.58	1.88	3.75	7.38	5.03	6.14	-1.00889	0.0103695
EEF1E1	9.37	3.76	5.15	2.94	4.11	1.41	1.07532	0.0286611
EGR1	6.69	4.7	8.41	0.98	0.92	2.82	2.00625	3.77343e-05
EGR3	0	1.41	1.41	2.94	2.75	2.35	-1.50265	0.0347149
EIF6	4.92	3.76	4.68	0.98	1.38	3.77	1.07787	0.0342361
EMP1	4.94	5.17	5.6	1.96	1.83	0	1.98035	0.000112647
EMX2	2.24	6.11	3.27	5.4	8.7	9.44	-1.04215	0.0126261
ENAM	3.57	0.94	2.33	4.42	4.12	6.61	-1.13274	0.0199276
ETHE1	0.9	0.47	2.33	2.45	2.28	5.19	-1.40822	0.0365152
FAM160B1	4.03	4.23	2.34	7.38	7.77	8.49	-1.16554	0.000919072
FCER1G	4.01	6.11	1.4	8.86	6.41	9.92	-1.13229	0.0051298
FSBP	3.12	3.76	6.54	2.46	3.2	0.47	1.07933	0.0386878
FUCA2	1.79	2.35	0.94	5.41	4.12	1.88	-1.1585	0.0435933
GCGR	3.57	4.7	9.79	1.47	2.28	4.71	1.04691	0.0464796
GDF15	6.69	1.88	5.14	2.46	1.37	1.41	1.35385	0.0179838
GEMIN5	4.02	5.17	7.02	0.98	3.2	1.88	1.34771	0.00493788
IL6R	7.58	7.52	8.9	0.98	6.39	3.3	1.11303	0.00752056
GJA9	5.8	2.35	4.67	0.98	1.83	1.89	1.39396	0.0117558
GPR12	0.9	0.94	1.87	4.43	4.11	8.03	-2.13518	0.000108719
GPR33	0	2.82	0.47	3.94	3.2	5.2	-1.89404	0.00290708
GPR4	6.25	5.17	2.81	8.36	11.87	9.91	-1.09393	0.00107637
GTF2H1	8.03	4.23	3.27	1.47	2.74	2.83	1.10247	0.0308152
GUK1	8.47	6.11	10.28	3.93	4.57	2.35	1.15993	0.00290041
HADHB	1.79	1.41	0	4.92	5.49	1.88	-1.89584	0.00397449
HDAC10	20.98	15.51	22.43	7.86	10.52	8.96	1.07888	8.04508e-06
HHEX	1.79	0.94	0.47	2.95	5.48	4.24	-1.94819	0.00100506
HOXA10	1.34	4.23	1.86	6.88	3.22	5.18	-1.04387	0.043755
HOXA5	5.81	7.05	7.48	1.47	3.2	2.83	1.3807	0.000586997
HOXA9	0.9	1.41	1.41	5.9	1.83	5.65	-1.82272	0.00273475
HOXC13	0.9	0	0.94	4.43	2.28	1.88	-2.12815	0.00579624
HOXC8	2.23	2.35	0.93	3.94	5.95	6.13	-1.53099	0.00180568
HPCAL4	2.24	3.76	1.87	0.49	1.38	0.47	1.63723	0.0180218
HPGD	1.34	3.76	2.8	7.38	5.03	3.31	-1.00102	0.0453487
HSPB6	2.68	4.7	6.54	0.49	1.83	3.77	1.13168	0.0355347
HSPB9	0.89	1.88	0.93	3.93	3.65	2.35	-1.40842	0.0241444
HUS1	3.12	5.64	6.07	1.96	2.29	2.82	1.01748	0.03042
IL10	0.9	2.82	0.47	3.44	5.48	6.6	-1.8859	0.000760742
IL17RC	11.16	7.52	11.68	3.44	5.94	2.35	1.33003	0.000345769
IMPDH2	3.57	0.47	2.8	3.43	4.57	6.6	-1.08674	0.0475833
IREB2	3.12	4.23	0.47	12.8	3.2	3.76	-1.33433	0.0431021
IRX2	1.8	3.76	2.81	0.49	1.37	0	2.01571	0.00497715
IRX5	0.45	0.94	0.47	6.38	5.49	2.83	-2.899	7.35971e-06
ISL2	9.39	8.46	4.21	16.22	14.16	16.05	-1.08329	7.53103e-05
ISLR2	5.35	4.23	1.87	7.38	10.53	5.66	-1.04582	0.00981885
KANK3	8.05	1.88	5.6	2.45	0.46	3.29	1.29185	0.0325033
KIAA2013	4.02	4.23	6.54	0.98	1.38	3.3	1.33096	0.00856832
KRT15	19.19	8.93	12.61	7.37	5.48	4.24	1.23194	0.000580279
KRT23	11.16	8.93	14.01	5.42	2.75	4.72	1.38219	5.54445e-05
KRTAP10-2	4.02	2.82	4.67	2.46	0.46	1.89	1.23253	0.018863
LGALS7	8.48	3.76	8.87	1.97	0.46	2.36	2.09777	5.95528e-05
LIN7B	4.01	2.82	12.61	1.96	1.37	3.76	1.40513	0.022339
LOC100139075	6.69	6.58	4.2	1.97	2.74	1.89	1.35922	0.00209102
LOC100141212	1.79	6.58	4.67	0.49	1.82	1.88	1.54841	0.00936516
LOC100296211	1.34	4.23	0.94	7.87	5.03	6.14	-1.54908	0.00153858
LOC100297018	1.79	4.7	4.2	2.46	0.91	1.41	1.11468	0.0462435
LOC100297063	4.47	1.88	4.2	2.45	0.46	0.94	1.4202	0.0168824
LOC100297235	1.34	5.17	0.93	13.78	6.4	10.86	-2.06119	2.91777e-05
LOC100301421	3.12	3.29	2.8	0	0.91	0.94	2.16401	0.00154623
LOC100847387	1.34	2.35	0.94	4.91	3.65	3.77	-1.40307	0.0113488
LOC100847501	1.79	1.41	0.47	1.97	3.21	5.19	-1.47332	0.0226358
LOC100847724	7.14	6.58	11.68	2.95	5.03	3.31	1.12793	0.00328739
LOC100847765	4.02	4.7	4.68	7.88	9.6	9.43	-1.02374	0.00161466
LOC100847802	2.68	1.88	1.86	0	0	1.42	2.03606	0.0134341
LOC100848577	3.12	4.23	4.67	2.95	0.92	1.41	1.15594	0.0214777
LOC100848908	2.24	3.29	1.4	7.38	3.66	4.72	-1.1789	0.0173368
LOC101902289	5.8	2.35	2.33	1.96	0.91	1.41	1.25667	0.0466248
LOC101902831	0.45	1.88	0.94	2.95	5.03	2.36	-1.65589	0.0108263
LOC101902843	7.14	7.05	12.15	2.95	3.2	5.19	1.17808	0.00328708
LOC101903041	5.8	3.29	5.61	1.97	0.92	2.36	1.45099	0.00382976
LOC101903066	3.56	1.88	2.8	0.98	1.82	0	1.47102	0.0252323
LOC101903694	4.9	5.64	6.54	3.44	3.19	1.41	1.0475	0.0128921
LOC101903709	3.12	6.58	4.67	1.48	3.66	0.94	1.17757	0.0206362
LOC101903790	0.45	0.94	1.41	2.94	3.66	4.24	-1.93076	0.00231972
LOC101903997	11.16	8.93	8.41	6.89	5.03	1.89	1.02514	0.00623199
LOC101904124	0.9	0.47	1.4	2.46	2.28	3.3	-1.50265	0.0347149
LOC101904248	4.91	5.17	6.08	2.46	1.37	2.83	1.24176	0.00552889
LOC101904723	5.36	2.35	12.15	0.49	1.38	4.24	1.64509	0.0136763
LOC101904855	3.57	6.11	3.75	0.49	2.28	1.41	1.59255	0.00255088
LOC101905041	6.7	5.64	2.34	7.37	12.82	9.91	-1.04637	0.00441787
LOC101905198	4.02	5.17	7.48	0.98	2.29	0.47	2.06368	0.000122333
LOC101905711	0.45	0.94	0.47	3.44	3.66	1.89	-2.20225	0.0026199
LOC101906010	2.68	7.05	4.2	0.98	3.2	2.36	1.02847	0.0457764
LOC101906273	0	0	1.86	6.4	1.84	1.88	-2.3586	0.00456579
LOC101906350	5.79	1.88	5.61	9.34	10.51	7.07	-1.02476	0.00566786
LOC101906522	6.7	3.76	6.54	1.48	2.29	2.36	1.42502	0.00201766
LOC101907574	9.37	6.58	3.75	1.47	4.11	2.83	1.18336	0.0125117
LOC101907721	2.68	3.76	5.15	0.49	1.82	2.84	1.1022	0.0373297
LOC101907843	3.13	2.35	4.2	0.98	1.83	0.47	1.47876	0.0128302
LOC101909635	1.78	1.88	1.87	5.41	3.2	5.19	-1.30449	0.00813907
LOC104968513	8.48	4.7	10.29	2.45	2.75	2.83	1.50551	0.00042396
LOC104968948	2.23	7.05	3.28	0.98	0.46	2.83	1.49293	0.0171795
LOC104968994	0.89	2.35	1.87	4.91	4.58	3.77	-1.37588	0.00949218
LOC104969005	4.02	2.35	5.61	1.97	1.37	2.36	1.0339	0.0417322
LOC104969028	9.38	8.46	10.74	2.94	3.66	6.6	1.07876	0.00195508
LOC104969356	6.26	8.46	9.82	1.47	4.57	5.19	1.07683	0.00540739
LOC104969366	2.23	5.64	2.34	7.38	13.26	6.61	-1.43286	0.00132924
LOC104969409	1.34	1.88	3.27	4.43	3.2	6.61	-1.13704	0.0250435
LOC104969630	1.78	2.35	0.47	3.94	6.4	4.72	-1.698	0.00128416
LOC104969671	1.79	6.58	1.87	0.98	0.92	1.88	1.36613	0.0434676
LOC104969904	4.46	3.29	3.27	4.42	8.68	8.97	-1.01389	0.00946314
LOC104970061	1.78	0.94	3.27	4.92	2.29	5.66	-1.09394	0.04736
LOC104970118	1.78	5.64	0.47	5.41	10.97	5.67	-1.49124	0.00898796
LOC104970184	5.8	2.82	3.27	2.95	0.92	1.41	1.15174	0.0433394
LOC104970491	4.01	1.88	3.28	0.98	1.37	0.94	1.4096	0.0194282
LOC104970556	2.23	2.35	2.34	0	1.37	0.47	1.75798	0.0192245
LOC104971364	1.79	1.88	2.34	4.42	5.94	2.83	-1.14187	0.0324478
LOC104972312	1.79	2.35	1.41	7.38	2.28	4.71	-1.36036	0.0156696
LOC104972417	9.82	6.11	6.54	2.95	1.83	6.14	1.01787	0.0225341
LOC104972581	2.68	3.76	4.2	8.86	6.87	7.56	-1.13663	0.00132325
LOC104972737	11.16	6.11	7.47	3.93	3.66	4.25	1.03983	0.00756833
LOC104972906	6.7	8.46	3.26	14.76	12.79	9.91	-1.03483	0.00125431
LOC104972983	4.47	2.35	2.81	1.47	1.83	0.94	1.13212	0.0441782
LOC104973510	3.58	7.05	6.55	0.49	2.74	4.25	1.14025	0.0245087
LOC104973929	1.8	3.29	2.34	6.4	3.21	8.01	-1.25047	0.0111879
LOC104974277	1.78	1.41	2.33	4.92	1.83	6.14	-1.20669	0.0326412
LOC104974460	1.79	4.23	0.47	5.4	4.58	5.18	-1.2287	0.0150291
LOC104974538	7.14	6.11	6.08	3.44	3.21	1.88	1.14784	0.00623648
LOC104974645	2.23	1.88	3.74	0.98	0	0.94	1.93403	0.00785115
LOC104974662	3.57	6.58	5.61	1.96	2.74	2.82	1.01299	0.0244883
LOC104974705	4.47	3.76	4.68	0.98	1.37	2.83	1.26162	0.0138749
LOC104974954	1.35	3.29	0.94	8.36	4.57	8.01	-1.90247	0.000109739
LOC104975426	9.38	6.58	10.75	3.44	3.66	4.25	1.20184	0.00102345
LOC104975625	3.57	3.76	4.67	1.97	0.91	2.83	1.03456	0.0335936
LOC104975626	7.14	2.82	9.35	4.43	1.83	1.89	1.21918	0.0252654
LOC104975647	2.23	4.23	3.74	8.86	7.77	6.14	-1.17027	0.00159006
LOC104975842	2.68	3.29	3.27	3.44	6.39	10.85	-1.17506	0.0146737
LOC104976112	4.91	7.99	7.01	2.46	4.11	2.83	1.03331	0.00930077
LOC104976398	2.68	2.82	2.34	8.86	6.39	5.2	-1.3787	0.00127749
LOC107131226	0.45	0.94	0	4.43	3.2	3.78	-2.90723	4.93628e-05
LOC107131434	4.02	5.17	2.34	0	1.83	2.83	1.23718	0.0311258
LOC107131446	0.89	1.41	1.41	4.42	4.57	4.72	-1.86723	0.000754912
LOC107131550	0	1.41	2.34	2.94	3.67	4.25	-1.53709	0.0117768
LOC107131577	4.46	3.76	2.34	0.98	2.29	1.42	1.115	0.036682
LOC107131582	2.69	0	0.94	2.45	5.02	2.83	-1.47321	0.028353
LOC107131727	6.71	4.7	4.21	2.45	2.74	1.41	1.20012	0.00930588
LOC107131824	4.91	2.35	4.67	8.36	8.23	8.03	-1.04763	0.00215819
LOC107131834	3.12	3.76	0.93	5.41	5.48	5.19	-1.04191	0.0197464
LOC107131889	5.36	2.35	3.74	1.48	1.83	1.89	1.09991	0.0474762
LOC107131899	2.68	3.29	4.67	1.47	1.83	1.42	1.1149	0.0351188
LOC107131902	4.46	9.87	6.07	1.48	4.11	3.31	1.14472	0.0124036
LOC107131970	3.57	3.76	2.81	0.98	1.83	0.47	1.54467	0.00814112
LOC107132528	3.58	2.82	5.13	1.47	1.38	1.89	1.2333	0.016697
LOC107132531	9.38	7.99	13.54	4.92	6.41	3.78	1.00006	0.00393906
LOC107132654	0	2.35	2.8	3.94	4.57	5.19	-1.42465	0.00901198
LOC107132697	5.8	6.11	4.67	4.92	1.83	0.94	1.08937	0.0349771
LOC107132704	1.78	2.82	0.93	4.42	4.57	2.83	-1.09311	0.0499358
LOC107132711	7.59	4.23	4.67	1.97	1.83	1.42	1.61862	0.00100349
LOC107132755	1.8	1.41	1.88	5.4	8.23	5.2	-1.88414	5.85185e-05
LOC107132810	1.79	5.17	0.94	6.89	6.4	3.78	-1.12257	0.0325818
LOC107132854	3.57	2.35	3.74	0.49	0.91	1.42	1.68918	0.00593263
LOC107132967	2.23	2.35	6.08	1.97	0.91	1.41	1.26006	0.0361004
LOC107133238	4.02	2.82	4.67	1.97	2.28	0.47	1.23322	0.0182066
LOC107133316	1.79	5.64	3.28	7.87	6.86	7.07	-1.04579	0.00972909
LOC107133383	1.34	2.82	2.34	3.93	3.65	5.67	-1.03834	0.0447873
LOC107133468	4.91	4.7	2.34	7.38	9.6	7.08	-1.0193	0.00433052
LOC407171	3.13	1.41	0.94	5.4	1.83	7.08	-1.36211	0.0243806
LOC504893	3.57	4.23	2.81	0.98	1.83	1.41	1.26124	0.0200857
LOC505658	2.24	3.29	1.87	4.92	5.94	5.19	-1.12735	0.0109984
LOC508441	2.24	1.88	0.94	4.43	3.66	5.66	-1.42588	0.00435684
LOC515227	1.34	0.47	3.27	6.39	2.75	3.78	-1.33074	0.0237787
LOC523083	2.68	5.17	1.86	0.49	0.46	2.84	1.29765	0.0476231
LOC523139	2.23	1.41	3.27	5.9	5.94	2.83	-1.08706	0.0290539
LOC523292	8.04	4.23	4.68	2.95	2.75	2.35	1.04579	0.0203956
LOC526979	4.01	4.23	1.4	5.41	10.51	3.78	-1.03849	0.0368192
LOC527125	1.78	1.41	0.47	1.97	6.4	2.36	-1.52985	0.0267921
LOC538435	0.45	2.35	0	3.94	2.29	3.78	-1.80246	0.0086262
LOC614318	5.36	4.23	4.2	1.48	1.83	2.36	1.23822	0.0115284
LOC614821	3.57	2.82	3.28	7.88	6.85	8.02	-1.23608	0.000639499
LOC615297	1.34	1.41	0.93	4.42	3.2	2.83	-1.47441	0.0161441
LOC616478	3.13	6.11	2.81	1.47	1.82	2.35	1.03589	0.0451944
LOC782343	4.02	1.88	3.74	0.49	1.83	1.42	1.29526	0.0266383
LOC782543	2.24	2.35	2.34	1.97	0	0	1.75686	0.0213485
LOC784007	6.25	5.64	9.81	3.45	3.66	3.3	1.02463	0.0127048
LOC785898	5.35	5.17	4.2	1.48	1.83	2.83	1.21802	0.0095791
LOC787274	5.36	5.17	2.34	0.98	2.74	1.42	1.26298	0.022229
LOC787861	5.8	3.29	4.2	1.97	1.83	1.89	1.18979	0.0173591
LOC788206	2.24	3.76	1.87	3.44	7.32	5.19	-1.03845	0.0369901
LOC789494	1.34	1.88	1.86	3.93	2.28	5.66	-1.2154	0.0267349
LOC789612	4.01	7.99	6.06	3.93	3.2	1.41	1.0425	0.0309809
LOC789960	4.46	4.7	3.27	1.47	2.29	1.88	1.08824	0.0237359
LOC789996	1.34	0.47	0.47	2.46	3.66	1.89	-1.74845	0.0171774
LRRC26	14.28	15.04	19.61	6.9	2.75	7.07	1.52841	4.53988e-07
LRRTM2	4.46	2.35	4.2	1.97	1.83	0.94	1.17517	0.0253267
LTB	2.68	3.76	4.2	0.98	0.46	1.41	1.81818	0.00231972
LYL1	1.79	2.82	0.94	8.36	5.94	3.77	-1.69305	0.000959172
LYZL4	1.78	3.29	3.27	0.98	0.46	1.89	1.26067	0.0441239
MAFF	4.02	1.88	3.27	2.46	0.46	0.47	1.40633	0.0257493
MED4	10.27	15.04	11.66	2.95	5.49	7.54	1.17034	0.000340573
MEPCE	2.68	2.82	3.74	0	0.91	2.36	1.41017	0.0214921
MEX3A	5.82	4.23	6.55	1.47	2.28	4.23	1.00868	0.0238712
MEX3B	4.03	2.82	8.42	0	1.84	0	2.88233	8.45704e-05
MFSD13A	5.36	9.4	6.07	12.3	16.91	14.16	-1.08185	0.000133353
MIEN1	7.59	2.82	4.2	1.97	2.29	1.42	1.32721	0.0138346
MIRLET7C	5.8	5.17	6.07	2.95	2.74	1.42	1.22401	0.00461391
MMP14	12.06	7.99	14.51	3.93	2.75	6.13	1.40142	0.000122151
MOGS	4.47	3.29	2.33	1.96	0	1.88	1.35885	0.0211647
MROH5	3.56	0.47	4.21	8.86	5.48	9.44	-1.51831	0.000670363
MRPL36	7.59	5.17	6.07	2.46	1.37	1.41	1.80541	6.54363e-05
MS4A2	3.12	2.82	2.33	7.88	6.4	5.19	-1.22884	0.00294305
MTA2	8.49	5.64	7.47	1.96	5.48	2.82	1.02614	0.0103754
MXRA8	9.37	8.46	15.89	4.42	6.41	4.71	1.08045	0.0023034
MYL6	7.14	3.29	5.61	1.97	1.83	2.36	1.34451	0.00533658
NASP	5.36	8.46	7	1.96	2.74	3.78	1.24724	0.00187278
NENF	6.25	4.23	6.53	1.47	3.65	2.35	1.13349	0.00972783
NFKBIA	1.78	2.82	3.27	0.49	1.37	0.47	1.63687	0.016915
NIPAL4	1.34	1.41	1.4	4.91	3.2	3.3	-1.43538	0.0135496
NKG7	4.47	7.05	5.14	15.24	9.59	12.28	-1.16767	0.000194883
NMS	2.24	3.29	1.87	0.98	1.37	0	1.55148	0.0274458
NOB1	11.16	7.05	6.08	2.94	2.74	3.78	1.32963	0.00153329
NRGN	2.68	3.29	3.28	1.47	1.37	0	1.62008	0.00936633
NUDT15	4.03	6.11	9.33	1.96	2.75	3.3	1.23128	0.00713779
NUPR1	2.68	1.88	3.27	0	0.91	1.42	1.6369	0.0170908
OR6P1	3.57	3.76	4.67	1.48	1.37	1.89	1.28905	0.0113488
P2RY11	3.57	3.76	5.62	0.98	2.29	1.41	1.39457	0.00527809
PBLD	8.03	6.58	6.55	2.95	2.75	3.78	1.12884	0.00428785
PDDC1	2.68	10.81	7.93	3.44	5.02	1.41	1.07018	0.0449768
PDXP	4.46	3.76	6.54	3.93	1.37	1.42	1.11104	0.0403125
PEX11G	15.63	19.27	14.48	8.35	7.32	8.48	1.00536	6.01578e-05
PEX19	8.93	7.52	7.47	3.44	4.12	1.89	1.3043	0.000620679
PIANP	12.05	6.58	7.47	1.97	3.21	2.83	1.66462	6.56888e-05
PIK3C2A	4.93	4.23	4.68	1.47	2.28	0.94	1.49271	0.00338531
PLEK	2.23	6.11	0.94	14.26	8.7	11.8	-1.90995	9.35613e-06
POLI	2.23	4.7	2.34	0	1.37	1.89	1.41276	0.0273069
PRSS53	4.02	2.82	4.67	0	0.92	1.89	1.93677	0.00104062
PRSS57	4.9	6.58	4.21	7.87	10.98	12.75	-1.0273	0.00156456
PTGR2	5.36	3.29	2.8	0.98	1.83	1.41	1.37951	0.0105652
PTRF	17.4	14.57	15.41	4.91	5.48	8.03	1.33436	6.42715e-07
QRFP	1.34	0.47	0.93	2.46	3.2	3.77	-1.73253	0.00936633
RAB3A	5.36	3.76	3.74	1.47	2.28	2.36	1.02781	0.0385248
RASAL3	11.15	8.93	8.88	5.4	5.04	3.3	1.05105	0.00150818
RASD1	2.24	4.7	2.81	0	0.91	2.83	1.29921	0.0406638
RBM18	2.23	4.23	5.59	2.46	0.46	0.94	1.59665	0.00640266
RGS19	0.9	1.88	0	4.42	2.75	4.24	-1.99165	0.00170422
RIC8A	5.8	5.17	6.54	1.47	3.2	3.76	1.00483	0.0144868
RIPK3	0.45	2.82	1.87	4.42	5.49	2.35	-1.26809	0.0333264
RNF11	12.49	7.52	9.81	1.97	4.11	8.5	1.00263	0.011275
RPL3	5.36	4.7	5.14	1.47	0.91	0.94	2.12138	7.05206e-05
RPS21	4.91	3.29	4.2	0	2.29	1.42	1.65251	0.00360055
RPSA	9.81	6.11	8.88	3.93	5.02	2.35	1.09923	0.00451323
RTN4R	5.37	4.23	4.21	13.27	7.31	8.49	-1.07773	0.00301474
S100A2	15.62	7.52	14.48	3.45	2.28	4.72	1.81814	5.30158e-06
S1PR5	1.34	0.94	1.4	4.92	2.74	1.88	-1.34131	0.0433494
SBK1	5.36	4.23	6.08	1.47	2.75	3.3	1.01238	0.0213329
SCGB1D	3.12	4.23	4.2	0.98	1.37	0.94	1.72613	0.00210652
SEC63	6.7	7.05	4.67	1.47	3.2	2.82	1.24477	0.00324149
SF3B1	0	1.41	0.94	2.94	2.28	1.89	-1.57198	0.0414141
SLAMF6	0.89	0.94	1.87	5.41	4.57	2.36	-1.71257	0.00442225
SLC16A11	3.57	3.76	3.26	1.47	1.83	0.94	1.26123	0.0200857
SLC25A6	5.36	4.23	5.14	2.95	0.46	1.88	1.45119	0.00333718
SLC29A1	6.25	4.7	10.76	3.93	2.75	3.77	1.02285	0.0228144
SNX22	7.14	6.58	3.74	1.97	3.67	2.36	1.08625	0.0147135
SOWAHA	0.9	1.88	1.41	2.94	4.58	2.83	-1.31181	0.02948
SOX15	5.36	4.23	8.88	0.98	0.91	2.36	2.04963	0.000108107
SP1	5.34	3.76	4.68	0.98	2.29	3.3	1.02209	0.0337477
SP5	1.79	2.35	1.87	7.86	4.13	5.18	-1.50315	0.00182356
SP6	1.79	3.29	6.54	1.96	0.92	1.89	1.23325	0.0368526
SREK1IP1	3.13	3.76	6.08	0.49	2.74	1.42	1.39742	0.00896504
SRSF10	3.12	3.29	2.81	0.98	1.37	0	1.86656	0.00408279
STAR	6.7	8.46	6.54	3.93	0.92	4.71	1.15761	0.00771726
STARD4	3.57	3.29	3.27	7.38	8.69	4.25	-1.01244	0.0109635
STXBP3	4.02	2.35	2.34	1.47	0.46	1.41	1.33677	0.0300171
SULT1A1	5.81	6.58	4.67	1.97	2.74	2.36	1.22402	0.00461391
TAL1	4.02	8.93	3.26	14.76	12.8	11.31	-1.27766	0.000102503
TCF15	4.91	5.17	4.68	1.96	1.83	0.94	1.58468	0.0014544
TCN1	3.57	10.34	1.87	10.83	17.37	12.74	-1.39306	0.000718774
TES	4.47	8.93	7.47	1.47	3.66	4.24	1.10227	0.0109511
TEX101	3.56	3.76	1.87	9.35	9.14	12.28	-1.73978	9.36899e-07
TEX30	4.02	3.29	3.74	0	2.75	1.89	1.17641	0.028235
TFAP2C	6.25	4.23	3.75	1.97	2.74	1.41	1.17259	0.0160441
TGFB1	5.35	5.17	8.41	1.96	3.2	2.82	1.19482	0.00474988
TMEM200C	0.89	0.47	0	1.96	1.82	2.35	-2.041	0.0212831
TMEM207	3.57	1.88	3.74	4.43	10.97	4.72	-1.14027	0.0179443
TMUB1	8.93	4.23	11.22	3.92	2.3	2.35	1.47558	0.00171616
TNFRSF12A	2.68	1.88	3.74	0.49	2.29	0	1.47267	0.0295203
TOB1	2.23	1.88	3.74	0	0.46	1.42	1.93465	0.00828347
TOB2	9.82	8.93	7.47	5.41	2.29	5.19	1.00795	0.00554725
TPRN	17.42	15.51	21.03	9.82	8.7	7.54	1.02525	2.35468e-05
TRAM1	1.34	1.88	2.33	8.86	7.77	7.08	-2.08266	7.52926e-07
TRIM14	5.38	8.93	5.14	1.96	2.75	3.29	1.23017	0.00452737
TRNAK-CUU	3.12	5.17	5.14	1.96	0.91	3.31	1.07787	0.0254697
TSC22D4	11.14	12.22	12.62	2.94	9.14	3.78	1.13633	0.000658604
TUBB2A	4.47	5.17	7.48	1.47	2.29	1.41	1.65941	0.000480617
TXNDC12	2.68	1.88	5.14	0.49	0.92	2.36	1.2961	0.0379102
TYSND1	2.24	1.88	3.27	0.98	0	0.94	1.8488	0.0119167
UBE2K	4.91	5.64	6.54	0.98	2.74	3.77	1.13376	0.00949713
UXT	2.68	3.76	3.26	0.49	1.84	1.89	1.13224	0.042812
VCPIP1	15.18	13.16	14.95	5.91	7.32	6.61	1.09709	3.03607e-05
WDR61	0.45	1.88	1.41	3.93	4.11	3.77	-1.65598	0.00455938
XBP1	8.03	6.58	6.54	1.48	5.94	1.88	1.13341	0.00977689
YTHDF3	1.78	3.29	1.88	7.38	8.21	4.25	-1.51944	0.000919964
ZC3H12A	15.19	9.4	10.29	3.92	5.95	3.78	1.32	0.000164877
ZFP36L1	3.13	1.88	3.74	0	0	0.47	3.76672	4.32365e-05
ZNF354A	3.12	1.88	3.74	0.98	0.92	1.42	1.33705	0.0289846
ZNF579	0.9	3.76	2.82	8.82	5.06	3.29	-1.21346	0.02504
ZNF703	6.26	5.17	5.14	1.96	2.75	0.94	1.49823	0.00109207
ZNHIT2	4.46	1.88	4.21	0.49	0	0.94	2.73607	0.000148922
ZSCAN25	4.91	4.23	3.74	1.47	1.82	1.42	1.39447	0.00764561

## Sheet: TableS5B_DMG_CCWGG
TableS5b: Differentially methylated CCWGG genes between the SA and CL groups
Gene	A2-RPM	B3-RPM	C4-RPM	A1-RPM	B1-RPM	C1-RPM	log2FC	PValue
ABHD16A	29.25	43.81	29.42	12.35	13.76	21.03	1.07861	0.0112975
ADA	42.75	29.99	20.37	9.88	18.34	9.35	1.2615	0.00698203
ADAMTS20	6.75	20.75	15.84	22.22	32.1	32.72	-1.02337	0.0186256
ADORA1	2.25	20.75	11.31	27.16	36.69	23.37	-1.35587	0.0091279
ADRBK1	11.25	18.46	18.09	24.7	34.4	39.73	-1.06356	0.0087983
ALG12	38.25	43.82	13.58	12.35	11.47	14.03	1.29617	0.0148643
APOB	9	18.44	18.09	9.88	2.29	4.68	1.39017	0.0192035
AREL1	18	55.34	20.38	69.15	61.91	63.1	-1.07016	0.00309199
ARFGAP3	22.5	20.76	27.15	2.47	13.75	16.36	1.05044	0.0310494
ARL5A	29.25	25.36	24.9	0	9.17	14.02	1.69413	0.000716094
ARSI	4.5	6.92	0	9.88	11.46	28.04	-2.06377	0.00596391
ATXN7L3	33.75	41.51	22.62	7.41	9.17	21.03	1.33049	0.00397694
B3GNT5	18	39.21	29.42	83.94	59.62	65.42	-1.28333	4.95267e-05
B4GALT1	24.75	13.85	27.16	4.94	9.17	4.67	1.73403	0.00136025
B4GALT3	54	53.03	58.86	24.7	25.23	23.36	1.14772	0.000156687
BAG6	15.75	16.15	4.52	32.1	22.93	30.38	-1.22937	0.00560142
BARX1	6.75	6.93	0	9.88	13.75	16.36	-1.52197	0.0347492
BARX2	4.5	9.22	4.53	19.75	13.76	21.03	-1.55704	0.00702604
C11H2orf68	15.75	9.23	15.85	0	9.18	4.67	1.45175	0.0227021
C11H9orf172	36	46.13	40.74	9.88	25.22	18.69	1.142	0.00284444
C8H8orf58	47.26	11.53	18.11	4.94	9.17	16.36	1.28645	0.0392198
CADM1	33.75	57.67	38.46	27.17	11.45	23.39	1.04198	0.00861936
CAPN11	22.5	32.28	20.36	0	6.88	9.35	2.103	0.000120849
CAPN3	6.75	9.23	6.78	24.69	18.34	21.04	-1.47642	0.00512149
CBX7	6.75	2.31	11.31	17.29	11.46	23.37	-1.33157	0.0214962
CBY1	22.5	16.14	20.37	4.94	13.76	4.67	1.26942	0.0167283
CCDC188	18	11.53	9.04	46.91	13.76	23.38	-1.11499	0.0386777
CCDC94	11.25	29.97	9.05	4.94	6.87	0	1.98516	0.00585667
CCNT1	38.25	27.67	58.86	4.94	29.8	16.36	1.23658	0.00814155
CD151	22.5	20.76	18.1	4.94	16.04	4.68	1.19022	0.0201398
CD300LF	11.25	13.84	11.31	14.82	34.39	25.71	-1.0576	0.0226273
CEP120	38.25	36.9	33.95	17.29	4.58	16.35	1.48437	0.000518895
CHD4	22.5	16.14	36.21	7.41	18.34	9.35	1.04236	0.0403023
CLN8	29.25	43.82	58.85	113.59	75.67	84.14	-1.06489	0.000150006
CNPY2	58.5	32.28	63.38	29.64	22.92	18.7	1.0896	0.0034533
COG1	15.75	18.46	20.36	7.41	2.29	9.34	1.46498	0.0107083
CORO1C	11.25	9.24	22.63	4.94	4.58	2.34	1.77443	0.00761749
CSF1R	11.25	4.62	13.57	19.76	13.75	32.73	-1.16291	0.0366289
CYB561	13.5	9.24	13.57	7.41	4.58	0	1.53217	0.0266489
CYR61	11.25	16.14	27.17	0	2.29	9.35	2.10684	0.00202854
DAG1	24.75	13.84	20.36	12.35	6.87	9.36	1.01486	0.0471487
DCBLD2	4.5	2.31	2.26	9.88	13.76	14.02	-1.97849	0.0118416
DDB1	15.75	27.69	15.84	9.88	2.29	2.34	1.97246	0.00123167
DEF6	24.75	9.22	24.9	7.41	2.29	11.69	1.41371	0.01764
DENND1C	49.5	34.59	31.68	17.29	6.88	21.05	1.32763	0.00216745
DHDDS	27	25.36	13.58	2.47	18.34	7.01	1.1757	0.037892
DNAJA2	13.5	9.22	13.58	27.16	18.34	28.04	-1.01549	0.0193942
DNAJC15	20.25	16.15	31.69	14.82	6.87	9.35	1.10454	0.044096
DUSP14	9	20.76	9.05	4.94	6.87	2.34	1.37136	0.0374655
DVL1	11.25	9.23	13.58	2.47	2.29	2.34	2.11433	0.00755279
EDN3	9	0	11.31	19.76	18.35	16.36	-1.39451	0.0135749
EEF1A2	18	13.85	36.2	12.35	6.88	11.68	1.10348	0.0420073
EIF4EBP1	29.25	34.59	20.36	12.35	11.47	11.68	1.20438	0.0100743
EMX2	0	6.92	4.53	12.35	16.05	18.7	-1.99762	0.00409023
ERBB3	24.75	34.6	42.99	12.35	13.76	23.37	1.0091	0.0192328
ERMP1	2.25	4.62	2.26	9.88	18.34	11.68	-2.06406	0.00721433
ESRP2	29.25	50.73	27.15	4.94	9.17	7.01	2.26318	9.75157e-06
EYA1	22.5	20.76	9.05	4.94	4.59	9.36	1.40479	0.0183779
FAM126A	13.5	4.61	4.53	19.75	16.05	18.69	-1.24844	0.0243758
FAM181A	9	18.45	13.58	7.41	0	4.68	1.69832	0.0106472
FAM227A	47.26	20.76	33.95	19.76	11.46	18.7	1.00527	0.0279095
FANCD2	22.5	0	13.58	41.97	32.1	42.06	-1.67372	0.000480148
FBXO25	15.75	13.84	11.31	2.47	0	2.34	2.88014	0.000403876
FGF6	27	16.14	18.1	44.45	43.57	42.06	-1.0943	0.00154028
FLT3LG	33.75	16.15	33.95	12.35	16.05	11.69	1.02711	0.0359855
FNDC8	4.5	9.22	9.05	24.7	29.81	28.04	-1.8464	0.000157939
FOXRED2	6.75	9.23	4.53	12.35	25.21	16.36	-1.39448	0.0201184
G6PD	2.25	0	4.52	9.88	16.04	11.69	-2.35189	0.00443538
GABBR1	9	18.45	27.16	2.47	2.29	4.67	2.40349	0.000640247
GABRB3	45	32.29	31.67	29.64	16.06	4.68	1.09415	0.0202796
GALK1	13.5	6.92	9.05	19.76	22.93	21.03	-1.1103	0.0276246
GATA2	9	23.06	13.57	37.04	20.62	42.07	-1.1353	0.0127111
GATA6	20.25	25.36	29.43	2.47	13.76	16.36	1.14012	0.018311
GDF6	0	6.92	0	12.35	11.46	11.69	-2.26093	0.00755279
GJA9	29.25	11.53	22.64	4.94	9.17	9.35	1.37487	0.0120425
GLIPR2	18	16.15	15.83	39.51	29.81	32.72	-1.03283	0.00666177
GPAT2	36	18.46	56.58	14.82	16.04	9.34	1.42617	0.00508924
GPM6A	22.5	32.27	22.64	4.94	6.88	4.67	2.14446	4.26855e-05
GPR143	4.5	11.53	6.79	27.17	22.91	9.35	-1.36847	0.0203365
GPR31	6.75	13.83	15.83	19.76	18.34	42.07	-1.14513	0.0230348
GPR4	22.5	13.83	9.05	39.51	48.15	44.4	-1.54537	4.2319e-05
GRIN1	20.25	16.15	24.88	9.88	6.87	9.36	1.1902	0.0201398
HACD3	4.5	2.31	0	9.88	9.17	11.68	-2.05974	0.0212998
HDAC10	36	20.76	45.26	7.41	11.46	21.05	1.30811	0.0049729
HM13	29.25	46.15	61.11	17.29	18.34	14.03	1.42021	0.000569603
HMCES	9	9.23	11.31	22.23	13.75	32.73	-1.21265	0.0224226
HMG20A	40.5	18.44	45.27	7.41	11.46	9.35	1.82802	0.000236509
HMGCS2	22.5	29.97	11.32	9.88	4.59	14.02	1.12066	0.0421665
HN1L	22.5	13.85	22.63	9.88	9.17	9.35	1.01486	0.0471487
HSBP1L1	2.25	0	6.78	12.35	13.75	16.36	-2.14485	0.00435539
HSD17B3	27	23.06	49.8	14.82	16.05	14.03	1.11695	0.0177802
HSPB6	15.75	11.54	27.16	4.94	6.88	11.68	1.15572	0.0437444
IFNGR2	58.5	29.99	31.69	4.94	22.92	28.06	1.05986	0.0215833
IKZF4	67.5	36.9	29.43	12.35	16.05	11.69	1.69542	0.000280592
IL3RA	4.5	6.92	11.32	34.57	9.17	25.7	-1.58633	0.010707
INO80D	4.5	9.23	20.37	19.76	18.34	35.04	-1.10559	0.0471386
INSRR	6.75	9.24	15.83	14.82	22.92	37.4	-1.24526	0.0216183
ITGB7	4.5	2.31	4.53	12.35	13.75	9.35	-1.59118	0.0414475
IWS1	6.75	6.92	6.79	27.16	20.63	25.7	-1.81932	0.000434129
JAKMIP2	9	11.53	13.58	29.63	18.34	21.03	-1.01145	0.0240714
KCNMB1	6.75	4.62	11.32	22.22	20.63	21.02	-1.47642	0.00512149
KL	15.75	25.38	24.88	2.47	13.75	14.02	1.05996	0.037144
LCK	42.75	55.33	49.79	19.76	11.46	4.68	2.00963	6.59425e-07
LIN7A	13.5	20.75	11.32	37.04	36.68	39.72	-1.32496	0.000466456
LINGO4	4.5	2.31	11.31	22.23	9.17	21.03	-1.49588	0.0150379
LOC100125776	6.75	4.61	9.05	14.82	13.76	25.7	-1.3945	0.0135749
LOC100294994	11.25	2.31	4.53	17.29	25.22	14.02	-1.6174	0.00500069
LOC100297235	6.75	25.36	4.53	59.26	25.22	51.41	-1.891	0.000409869
LOC100297621	9	20.75	13.57	7.41	4.58	0	1.77467	0.00718727
LOC100297820	4.5	0	4.53	22.23	9.17	9.34	-2.06654	0.0092601
LOC100336606	0	11.53	6.79	9.88	29.8	14.02	-1.549	0.0290692
LOC100336951	22.5	13.84	13.58	9.88	6.88	2.34	1.34151	0.0241782
LOC100847583	13.5	6.92	15.84	27.16	29.81	30.38	-1.26791	0.00220711
LOC100848325	11.25	2.31	4.53	19.75	9.17	16.36	-1.2864	0.0368847
LOC101902361	29.25	20.75	43.01	14.82	13.74	16.36	1.01603	0.0279513
LOC101902670	4.5	16.14	9.05	17.29	32.1	21.04	-1.25738	0.018043
LOC101902839	76.5	59.94	56.57	17.29	36.67	35.05	1.07762	0.00055428
LOC101903200	85.5	64.6	85.96	29.64	38.96	37.4	1.12381	3.22384e-05
LOC101903255	9	13.84	24.9	4.94	2.29	7.01	1.6694	0.00812796
LOC101903331	13.5	18.44	2.26	22.22	29.81	23.37	-1.14955	0.0251912
LOC101903383	11.25	16.15	20.37	4.94	4.58	4.67	1.66981	0.00594349
LOC101904396	33.75	32.29	31.68	9.88	16.04	21.05	1.01285	0.0133752
LOC101904680	9	18.44	11.31	0	2.29	7.01	1.91526	0.00721433
LOC101904749	9	9.22	18.1	29.63	16.05	30.38	-1.06266	0.0232285
LOC101906148	9	11.53	9.06	4.94	2.29	0	1.91343	0.0212998
LOC101906364	15.75	11.55	11.32	0	9.18	2.34	1.61766	0.0169347
LOC101906475	29.25	16.15	9.04	4.94	9.17	7.02	1.30305	0.0341617
LOC101906531	42.76	13.83	31.69	7.41	11.46	9.35	1.592	0.00286308
LOC101906657	31.5	34.59	33.96	17.29	13.76	14.02	1.11801	0.00519273
LOC101908548	13.5	18.45	4.52	29.64	34.4	32.71	-1.41388	0.000907237
LOC104968513	47.25	18.45	40.75	7.41	9.17	14.03	1.74647	0.000447252
LOC104969028	18	13.84	29.43	4.94	4.58	14.02	1.32297	0.0186877
LOC104969853	13.5	16.14	18.11	2.47	4.59	11.69	1.2756	0.0241782
LOC104970062	13.5	25.37	9.05	41.97	20.64	42.05	-1.13385	0.0141512
LOC104971378	58.5	18.44	18.1	4.94	18.34	7.02	1.59175	0.00986922
LOC104971941	6.75	6.92	4.53	12.35	18.34	18.69	-1.42793	0.0241782
LOC104972581	15.75	13.84	18.12	37.04	29.8	35.06	-1.09864	0.00398117
LOC104972584	58.5	32.28	58.86	24.7	22.92	14.02	1.25135	0.00119354
LOC104972906	2.25	18.45	9.06	29.63	25.22	30.38	-1.52027	0.00228106
LOC104973152	42.75	57.64	47.53	4.94	29.81	16.36	1.47492	0.000230722
LOC104973516	13.5	9.23	18.09	4.94	6.87	4.68	1.2412	0.0433603
LOC104973995	24.75	9.22	15.84	7.41	4.59	9.35	1.17806	0.0495414
LOC104974303	29.25	25.36	24.89	14.82	4.59	11.69	1.32598	0.00576242
LOC104974488	4.5	6.92	11.31	22.22	13.76	23.37	-1.36693	0.011373
LOC104974555	9	11.53	18.11	7.41	2.29	2.34	1.61763	0.0169347
LOC104974635	4.5	11.54	4.52	14.82	13.76	23.36	-1.33139	0.0295215
LOC104974954	4.5	16.15	2.26	37.04	11.47	16.36	-1.48591	0.0301534
LOC104975159	4.5	16.15	15.83	24.7	25.21	23.37	-1.01529	0.0216613
LOC104975505	18	13.84	18.1	2.47	11.47	7.01	1.17861	0.0428635
LOC104975952	20.25	13.84	22.63	7.41	9.17	4.67	1.36004	0.0135749
LOC104976013	22.5	20.77	36.21	7.41	4.58	21.04	1.22191	0.0186069
LOC104976775	13.5	11.53	18.1	2.47	9.17	4.68	1.31762	0.0290189
LOC104976959	13.5	11.53	18.11	4.94	4.58	4.68	1.52815	0.0146683
LOC107131138	51.75	57.65	54.31	19.75	18.35	35.06	1.12825	0.000494111
LOC107131164	9	9.22	18.1	0	0	2.34	3.50702	0.000275504
LOC107131886	38.25	32.3	18.11	22.23	6.88	4.67	1.3693	0.014735
LOC107132490	58.5	32.28	63.38	29.64	22.92	18.7	1.0896	0.00345051
LOC107132603	92.25	50.73	43.01	19.76	27.52	35.05	1.14321	0.00240753
LOC107132810	4.5	6.92	2.26	17.29	13.76	11.68	-1.60276	0.0227021
LOC107133110	6.75	13.85	4.52	22.23	20.64	21.04	-1.34378	0.00951508
LOC107133248	2.25	4.61	6.79	19.76	11.47	16.37	-1.75191	0.00594349
LOC107133383	2.25	11.53	0	17.28	13.76	21.03	-1.88703	0.0037924
LOC504219	9	18.46	13.59	27.17	27.51	28.04	-1.02239	0.012728
LOC508879	13.5	16.16	27.14	2.47	6.87	4.68	1.91728	0.00161634
LOC511981	18	16.14	22.64	4.94	11.46	2.34	1.52297	0.00702604
LOC512869	13.5	11.54	4.53	22.22	22.93	28.04	-1.30712	0.00664364
LOC515042	9	11.53	13.58	2.47	6.87	2.34	1.44133	0.0414475
LOC519208	18	20.75	9.05	12.35	2.29	4.67	1.27469	0.0289859
LOC524576	6.75	13.84	13.58	24.69	18.34	35.05	-1.19545	0.0160552
LOC539323	15.75	18.46	4.52	17.29	34.39	30.38	-1.09824	0.0211894
LSMEM2	11.25	9.22	11.32	0	4.58	0	2.52619	0.00418912
LST1	4.5	9.22	4.52	24.69	11.46	21.03	-1.61772	0.00484801
LYL1	6.75	11.53	2.26	37.04	41.28	21.04	-2.25281	2.89155e-05
MAP3K3	36	39.2	52.06	27.17	16.05	18.7	1.01676	0.00553084
MAP6	4.5	9.23	4.52	22.23	16.04	9.35	-1.35879	0.0241782
MAPK11	11.25	13.85	15.83	9.88	0	0	1.99592	0.00435539
MCFD2	22.5	25.36	24.9	12.35	4.59	7.01	1.56501	0.00145971
MDH1	18	20.75	11.32	4.94	11.46	0	1.52556	0.00930684
MEIS1	18	23.08	20.37	46.92	38.98	51.41	-1.17042	0.000607028
MGC133636	33.75	39.19	33.95	7.41	27.51	11.69	1.14348	0.00650072
MIC1	22.5	50.71	31.69	7.41	25.22	16.36	1.0476	0.0241814
MKNK2	29.25	20.76	27.16	4.94	11.46	7.01	1.65148	0.000610723
MLYCD	0	6.92	9.05	19.76	20.63	23.36	-1.96823	0.000511456
MRPL36	20.25	23.06	13.58	7.41	2.29	2.34	2.16377	0.000548898
MTMR1	2.25	2.31	4.52	17.29	20.64	14.02	-2.42913	0.000535949
MYO9A	2.25	9.23	4.52	17.29	20.63	11.69	-1.61114	0.012576
NAT6	9	6.92	9.05	9.88	25.22	25.7	-1.28798	0.0270746
NCKIPSD	15.75	32.28	27.16	17.29	6.88	9.36	1.13638	0.0335335
NFE2L1	20.25	11.54	18.11	0	9.17	7.01	1.52522	0.012576
NIPAL2	9	16.15	15.83	2.47	4.59	7.02	1.45174	0.0227021
NLE1	13.5	25.37	18.11	46.92	38.99	32.72	-1.06774	0.00487147
NLRP5	18	23.06	31.69	46.92	43.56	65.43	-1.11348	0.00105806
NOL10	24.75	34.6	24.89	9.88	6.88	18.69	1.20466	0.0123257
NRN1L	2.25	6.92	4.53	17.29	13.76	9.35	-1.52199	0.0347492
NRP2	27	23.07	29.4	9.88	16.04	9.35	1.1249	0.00944914
NUFIP1	9	11.53	22.63	7.41	9.17	0	1.31695	0.0398695
OGFOD2	27	25.37	15.84	7.41	13.76	7.02	1.2188	0.0131153
OGFR	31.5	27.68	29.41	12.35	9.17	18.69	1.10283	0.0114349
OLAH	0	2.31	6.79	14.82	13.75	11.69	-2.06407	0.00721433
OSBPL6	24.75	4.62	4.53	44.45	32.1	32.71	-1.67506	0.000861917
OTUD5	20.25	25.37	43	9.88	9.18	0	2.15432	0.000164967
OVOL1	15.75	9.24	13.57	2.47	2.29	9.35	1.37105	0.0347492
OVOL2	27	18.44	20.36	4.94	2.29	14.02	1.57111	0.00314519
P2RY11	15.75	16.14	22.63	0	6.88	4.67	2.1058	0.000916405
PALMD	18	13.83	9.05	0	9.17	0	1.99653	0.00502899
PBRM1	11.25	16.15	13.58	0	9.17	2.34	1.69834	0.0106472
PDDC1	13.5	23.06	22.64	12.35	9.17	4.68	1.13653	0.0288994
PDGFRL	9	4.62	11.31	14.82	18.34	32.72	-1.39441	0.0118834
PGM1	15.75	13.84	6.79	37.04	29.8	14.03	-1.15035	0.0207633
PI16	2.25	4.62	2.26	14.82	13.76	14.03	-2.14485	0.00435539
PIK3R2	36	20.76	36.21	22.23	13.75	2.34	1.25338	0.0174743
PLA2G1B	49.51	16.14	9.06	4.94	9.18	0	2.31213	0.00308207
PMM1	74.26	29.97	54.32	17.29	16.05	39.72	1.08706	0.0117673
POLDIP3	13.5	23.06	9.06	2.47	2.29	2.34	2.52058	0.000585959
PRAP1	9	16.14	11.31	2.47	4.58	4.68	1.53218	0.0266489
PRDM1	45	41.5	45.25	4.94	27.51	16.36	1.37536	0.000434006
PRELID2	13.5	4.62	11.32	22.23	13.76	25.71	-1.05712	0.0435846
PRKG2	47.26	25.37	29.43	9.88	27.51	9.35	1.08095	0.0205439
PRLH	4.5	6.92	0	19.76	20.64	9.35	-2.06682	0.00267459
PRR29	18	2.31	0	14.82	34.39	16.36	-1.66811	0.0242311
PTBP1	9	13.85	15.83	7.41	0	7.02	1.37104	0.0347492
PTEN	24.75	36.89	24.9	9.88	9.18	9.35	1.55588	0.000663277
PTPN1	24.75	46.13	24.89	12.35	18.34	9.35	1.21124	0.012921
PTRF	18	16.14	9.05	4.94	2.29	4.67	1.77474	0.00662897
PYGM	6.75	6.92	13.57	27.16	41.27	46.73	-2.0713	4.61581e-06
RABEP2	18	23.07	29.41	9.88	4.58	14.03	1.265	0.00985673
RAE1	13.5	11.53	11.32	7.41	0	4.67	1.53217	0.0266489
RASL11A	9	13.84	9.05	4.94	2.29	2.34	1.64198	0.0309266
RBSN	11.25	9.24	4.52	22.23	11.45	46.74	-1.67203	0.00832481
RDH13	15.75	13.85	6.78	54.33	18.34	25.7	-1.42616	0.00721778
RNF149	9	2.31	2.26	19.76	20.63	11.69	-1.88705	0.00232518
RTFDC1	2.25	13.85	9.06	17.29	13.75	28.04	-1.23358	0.0309721
S100A2	24.75	27.67	18.11	7.41	2.29	2.34	2.46986	2.25601e-05
SAP130	18	11.54	18.1	2.47	6.88	9.35	1.27559	0.0357723
SCIMP	18	4.62	6.79	32.11	34.4	18.69	-1.52195	0.00398518
SELPLG	4.5	11.53	9.05	17.28	52.73	11.69	-1.70151	0.0109038
2019-09-12	18	39.19	15.84	64.21	50.44	51.42	-1.19883	0.000616869
SERPINB1	6.75	6.92	9.05	14.82	27.52	18.69	-1.42269	0.00766397
SIGLECL1	4.5	11.53	9.05	29.63	25.22	23.37	-1.6298	0.000830377
SIRT4	13.5	16.14	6.79	29.64	18.34	25.71	-1.01601	0.0237115
SKOR1	4.5	2.31	2.26	12.35	9.17	9.35	-1.68635	0.0490967
SKP2	22.5	18.45	13.58	14.82	2.29	7.01	1.1549	0.0391074
SLC12A5	11.25	6.92	13.58	24.7	20.63	35.06	-1.33516	0.003389
SLC25A10	47.25	27.67	40.74	91.37	64.2	84.12	-1.06094	0.000104709
SLC25A36	20.25	25.36	18.11	7.41	11.46	9.35	1.12029	0.023781
SLC25A43	9	9.24	29.41	4.94	2.29	4.67	1.91368	0.0110998
SLC2A10	20.25	13.86	9.05	39.52	16.04	39.72	-1.14156	0.0182039
SLC37A4	24.75	11.54	22.63	9.88	4.59	4.67	1.57816	0.0052878
SLC5A5	33.75	11.53	18.1	2.47	11.46	11.69	1.24462	0.0366132
SLCO1C1	9	13.83	11.32	17.28	22.93	30.38	-1.05902	0.0292391
SLFNL1	6.75	16.15	11.3	22.23	22.92	28.04	-1.10622	0.0187035
SMDT1	24.75	16.14	18.11	4.94	9.17	0	1.97292	0.000882407
SMPD5	4.5	2.31	15.85	24.7	13.76	16.35	-1.25149	0.0371614
SNTB2	42.75	18.46	45.27	22.23	22.93	4.67	1.06556	0.0383413
SNX33	31.5	29.97	33.96	19.76	11.46	4.68	1.38387	0.00247051
SPAG6	36	43.81	24.88	22.23	11.47	7.01	1.33647	0.0043944
STT3B	40.5	20.75	36.22	4.94	29.81	9.35	1.09268	0.0358508
SULT1A1	49.5	43.81	13.58	17.29	9.18	14.02	1.36767	0.0115338
SWSAP1	36	34.59	47.52	14.82	0	7.02	2.40156	2.20891e-06
SYNJ2BP	9	18.44	13.58	32.1	29.81	30.38	-1.17699	0.00343395
SYTL1	20.25	6.92	15.83	39.52	32.1	25.71	-1.17422	0.00641166
TARSL2	18	13.84	13.58	2.47	4.59	4.68	1.84731	0.00409023
TBC1D10C	11.25	11.53	11.31	19.76	20.63	30.38	-1.05946	0.0162632
TBKBP1	2.25	0	9.05	9.88	18.34	14.02	-1.84848	0.0106472
TCAP	0	4.62	0	14.82	9.18	14.02	-2.85703	0.00131579
TEX30	20.25	16.14	18.11	0	11.46	9.35	1.30208	0.0201184
TFPT	9	0	0	17.29	11.45	9.35	-1.97899	0.0127712
THAP7	11.25	16.14	24.89	2.47	6.88	9.35	1.40484	0.0179
THAP8	0	6.93	2.26	9.88	13.76	11.69	-1.88752	0.0192431
TM6SF1	22.5	25.37	4.52	29.64	27.52	58.42	-1.1523	0.0198459
TMEM154	9	25.37	6.78	44.45	43.57	14.03	-1.3173	0.0241416
TMEM244	20.25	11.53	9.05	4.94	2.29	2.34	1.99593	0.00435539
TMEM45A	22.5	23.06	15.84	17.29	2.29	7.01	1.18809	0.0447928
TNFRSF1B	20.25	23.08	27.16	7.41	16.06	7.02	1.15309	0.0141282
TNFSF8	15.75	16.14	9.04	7.41	6.87	0	1.45174	0.0227021
TNS2	74.25	39.22	58.84	24.7	32.09	23.38	1.07337	0.00181561
TOR1AIP2	9	23.06	13.58	4.94	2.29	7.02	1.6009	0.010709
TPRN	85.5	36.91	33.94	41.99	11.47	21.04	1.05286	0.0276981
TRAF3IP2	31.5	29.98	22.62	12.35	11.46	9.35	1.3013	0.00467697
TRDN	11.25	18.45	11.31	2.47	11.46	2.34	1.24122	0.0433603
TREML2	2.25	13.85	9.05	12.35	27.52	25.71	-1.39136	0.0185566
TRMT61A	36	46.13	24.89	19.76	13.76	16.38	1.07044	0.011259
TUFT1	31.5	18.44	38.48	7.41	16.05	9.35	1.37703	0.00392916
TULP3	11.25	6.93	15.83	22.23	27.5	18.7	-1.01116	0.0240499
TUSC3	2.25	4.62	9.05	12.35	16.05	35.06	-1.96509	0.00243899
UBE2K	22.5	9.22	13.58	2.47	4.59	9.35	1.39026	0.0215709
UTP14A	15.75	16.15	9.05	37.04	34.4	11.69	-1.02508	0.0421924
VEZF1	33.75	18.44	18.11	7.41	18.34	0	1.38917	0.0223183
VGLL1	20.25	48.42	43	19.76	11.47	14.02	1.27078	0.006326
VSTM1	27	20.75	36.22	17.29	11.46	4.67	1.29877	0.0106079
WFDC1	9	6.93	2.26	19.76	18.33	11.7	-1.42794	0.0161702
ZBTB32	4.5	20.75	0	27.16	27.51	11.68	-1.39322	0.0452483
ZBTB38	15.75	20.76	13.57	4.94	6.87	9.36	1.17861	0.0428635
ZC3H12A	33.75	30	20.36	12.35	11.46	7.02	1.40529	0.00387868
ZNF106	72	43.8	79.22	27.17	25.21	30.38	1.20856	0.000209078
ZNF318	9	9.22	22.63	2.47	4.59	2.34	1.99581	0.00574314
ZNF319	31.5	20.76	18.11	7.41	9.16	7.02	1.51977	0.0026294
ZNF541	27	36.89	29.41	2.47	16.04	16.37	1.35415	0.00292326
ZNF565	13.5	18.44	15.84	2.47	6.88	7.01	1.45928	0.012576
ZSWIM5	49.5	32.28	63.36	7.41	34.39	23.37	1.10991	0.00812192
ZYG11B	38.25	32.27	29.42	19.75	16.05	7.01	1.19367	0.00579005
