# Supplementary material for: Genome-Wide DNA Methylation Analysis of Mammary Gland Tissues From Chinese Holstein Cows With Staphylococcus aureus Induced Mastitis
Source: Front Genet. 2020 Oct 19;11:550515. doi: 10.3389/fgene.2020.550515 (PMC7604493; doi:10.3389/fgene.2020.550515)
Supplement: Supplementary file 7 [file Table_7.XLSX]

## Sheet: Table_S7a
Table S7a Significantly enriched KEGG pathways of CCGG differentialy methylated genes
id	term	pval	padj	Enrichment_score
bta05310	Asthma	2.41187e-05	0.00397958	11.1429
bta05202	Transcriptional misregulation in cancer	0.000212025	0.0174921	3.85185
bta05140	Leishmaniasis	0.00194617	0.10704	4.45714
bta04672	Intestinal immune network for IgA production	0.00295895	0.122057	4.97872
bta00750	Vitamin B6 metabolism	0.00432869	0.138057	9.75
bta00920	Sulfur metabolism	0.00551919	0.138057	8.66667
bta05203	Viral carcinogenesis	0.00718618	0.138057	2.65909
bta05321	Inflammatory bowel disease (IBD)	0.00893936	0.138057	3.65625
bta04933	AGE-RAGE signaling pathway in diabetic complications	0.00897244	0.138057	3.12
bta05142	Chagas disease (American trypanosomiasis)	0.00973083	0.138057	3.05882
bta04625	C-type lectin receptor signaling pathway	0.0101261	0.138057	3.02913
bta05330	Allograft rejection	0.010721	0.138057	4.33333
bta04928	Parathyroid hormone synthesis, secretion and action	0.0109496	0.138057	2.97143
bta04659	Th17 cell differentiation	0.0118178	0.138057	2.91589
bta05145	Toxoplasmosis	0.0132065	0.138057	2.83636
bta04934	Cushing syndrome	0.0134654	0.138057	2.54902
bta05220	Chronic myeloid leukemia	0.0153798	0.138057	3.12
bta03018	RNA degradation	0.0160789	0.138057	3.07895
bta00071	Fatty acid degradation	0.0163156	0.138057	3.71429
bta04141	Protein processing in endoplasmic reticulum	0.0169466	0.138057	2.42236
bta00511	Other glycan degradation	0.0195093	0.138057	4.58824
bta05320	Autoimmune thyroid disease	0.0196218	0.138057	3.46667
bta05166	Human T-cell leukemia virus 1 infection	0.0199984	0.138057	2.17674
bta05144	Malaria	0.0220164	0.138057	3.31915
bta05152	Tuberculosis	0.0238548	0.138057	2.24138
bta00770	Pantothenate and CoA biosynthesis	0.0241277	0.138057	4.10526
bta00100	Steroid biosynthesis	0.0241277	0.138057	4.10526
bta03010	Ribosome	0.0246074	0.138057	2.4186
bta05323	Rheumatoid arthritis	0.0251012	0.138057	2.68966
bta04350	TGF-beta signaling pathway	0.0251012	0.138057	2.68966
bta04912	GnRH signaling pathway	0.0279991	0.149028	2.6
bta03060	Protein export	0.031797	0.163953	3.54545
bta04623	Cytosolic DNA-sensing pathway	0.0346799	0.173399	2.78571
bta04660	T cell receptor signaling pathway	0.037853	0.183698	2.36364
bta05150	Staphylococcus aureus infection	0.0395807	0.186595	2.64407
bta04950	Maturity onset diabetes of the young	0.0432892	0.198409	3
bta04927	Cortisol synthesis and secretion	0.0466321	0.20273	2.47619
bta04218	Cellular senescence	0.0483617	0.20273	2.0129
bta04612	Antigen processing and presentation	0.0484858	0.20273	2.4375
bta04668	TNF signaling pathway	0.0494682	0.20273	2.16667

## Sheet: Table S7b
Table S7b Significantly enriched KEGG pathways of CCWGG differentialy methylated genes
id	term	pval	padj	Enrichment_score
bta05310	Asthma	2.41187e-05	0.00397958	11.1429
bta05202	Transcriptional misregulation in cancer	0.000212025	0.0174921	3.85185
bta05140	Leishmaniasis	0.00194617	0.10704	4.45714
bta04672	Intestinal immune network for IgA production	0.00295895	0.122057	4.97872
bta00750	Vitamin B6 metabolism	0.00432869	0.138057	9.75
bta00920	Sulfur metabolism	0.00551919	0.138057	8.66667
bta05203	Viral carcinogenesis	0.00718618	0.138057	2.65909
bta05321	Inflammatory bowel disease (IBD)	0.00893936	0.138057	3.65625
bta04933	AGE-RAGE signaling pathway in diabetic complications	0.00897244	0.138057	3.12
bta05142	Chagas disease (American trypanosomiasis)	0.00973083	0.138057	3.05882
bta04625	C-type lectin receptor signaling pathway	0.0101261	0.138057	3.02913
bta05330	Allograft rejection	0.010721	0.138057	4.33333
bta04928	Parathyroid hormone synthesis, secretion and action	0.0109496	0.138057	2.97143
bta04659	Th17 cell differentiation	0.0118178	0.138057	2.91589
bta05145	Toxoplasmosis	0.0132065	0.138057	2.83636
bta04934	Cushing syndrome	0.0134654	0.138057	2.54902
bta05220	Chronic myeloid leukemia	0.0153798	0.138057	3.12
bta03018	RNA degradation	0.0160789	0.138057	3.07895
bta00071	Fatty acid degradation	0.0163156	0.138057	3.71429
bta04141	Protein processing in endoplasmic reticulum	0.0169466	0.138057	2.42236
bta00511	Other glycan degradation	0.0195093	0.138057	4.58824
bta05320	Autoimmune thyroid disease	0.0196218	0.138057	3.46667
bta05166	Human T-cell leukemia virus 1 infection	0.0199984	0.138057	2.17674
bta05144	Malaria	0.0220164	0.138057	3.31915
bta05152	Tuberculosis	0.0238548	0.138057	2.24138
bta00770	Pantothenate and CoA biosynthesis	0.0241277	0.138057	4.10526
bta00100	Steroid biosynthesis	0.0241277	0.138057	4.10526
bta03010	Ribosome	0.0246074	0.138057	2.4186
bta05323	Rheumatoid arthritis	0.0251012	0.138057	2.68966
bta04350	TGF-beta signaling pathway	0.0251012	0.138057	2.68966
bta04912	GnRH signaling pathway	0.0279991	0.149028	2.6
bta03060	Protein export	0.031797	0.163953	3.54545
bta04623	Cytosolic DNA-sensing pathway	0.0346799	0.173399	2.78571
bta04660	T cell receptor signaling pathway	0.037853	0.183698	2.36364
bta05150	Staphylococcus aureus infection	0.0395807	0.186595	2.64407
bta04950	Maturity onset diabetes of the young	0.0432892	0.198409	3
bta04927	Cortisol synthesis and secretion	0.0466321	0.20273	2.47619
bta04218	Cellular senescence	0.0483617	0.20273	2.0129
bta04612	Antigen processing and presentation	0.0484858	0.20273	2.4375
bta04668	TNF signaling pathway	0.0494682	0.20273	2.16667
7
