# Supplementary material for: Genome-Wide DNA Methylation Analysis of Mammary Gland Tissues From Chinese Holstein Cows With Staphylococcus aureus Induced Mastitis
Source: Front Genet. 2020 Oct 19;11:550515. doi: 10.3389/fgene.2020.550515 (PMC7604493; doi:10.3389/fgene.2020.550515)
Supplement: Supplementary file 8 [file Table_8.XLS]

## Sheet: S8a
	Table S6a Significantly enriched GO terms of differently expressed and CCGG methylated genes	Table S8a Significantly enriched GO terms of differently expressed and CCGG methylated genes
GOID	GOTerm	Ontology Source	Term PValue	Term PValue Corrected with Benjamini-Hochberg	% Associated Genes	Nr. Genes	Associated Genes Found
GO:0008237	metallopeptidase activity	GO_MolecularFunction-EBI-UniProt-GOA_19.01.2019_00h00	1.00608e-05	0.000123203	10.0629	16	[ADAM17, ADAM19, ADAMTS15, ADAMTS2, ADAMTS4, ADAMTS9, BMP1, CPZ, ECE2, LAP3, MMP19, MMP2, MMP25, PAPPA, PSMD14, RNPEP]
GO:0034616	response to laminar fluid shear stress	GO_BiologicalProcess-EBI-UniProt-GOA_19.01.2019_00h00	0.000407208	0.00188934	50	3	[ABCA1, NOS3, SMAD6]
GO:0042738	exogenous drug catabolic process	GO_BiologicalProcess-EBI-UniProt-GOA_19.01.2019_00h00	0.0198358	0.0364063	14.2857	3	[CYP2S1, LOC511936, LOC530929]
GO:0043394	proteoglycan binding	GO_MolecularFunction-EBI-UniProt-GOA_19.01.2019_00h00	0.0283881	0.0472292	12.5	3	[COMP, NID1, PTPRC]
GO:0046527	glucosyltransferase activity	GO_MolecularFunction-EBI-UniProt-GOA_19.01.2019_00h00	0.00048227	0.00213169	28.5714	4	[KDELC1, PLOD3, UGCG, UGGT2]
GO:0050919	negative chemotaxis	GO_BiologicalProcess-EBI-UniProt-GOA_19.01.2019_00h00	0.0143878	0.0282091	11.7647	4	[EPHA7, FLRT2, PDGFA, SEMA6B]
GO:0051642	centrosome localization	GO_BiologicalProcess-EBI-UniProt-GOA_19.01.2019_00h00	0.0173549	0.0328205	15	3	[NIN, PLXNA2, SUN2]
GO:0060840	artery development	GO_BiologicalProcess-EBI-UniProt-GOA_19.01.2019_00h00	0.0212381	0.0382285	8.77193	5	[ADAMTS9, COMP, ENG, FOXF1, SMAD6]
GO:0072341	modified amino acid binding	GO_MolecularFunction-EBI-UniProt-GOA_19.01.2019_00h00	0.0171604	0.0326178	9.25926	5	[ANXA6, RASGRP1, SLC19A1, SYT1, SYT11]
GO:1901136	carbohydrate derivative catabolic process	GO_BiologicalProcess-EBI-UniProt-GOA_19.01.2019_00h00	0.00510418	0.0136172	8.42105	8	[APOBEC3Z1, CDA, GPD1L, LYVE1, NPL, NUDT7, PDE5A, PGLYRP3]
GO:0010717	regulation of epithelial to mesenchymal transition	GO_BiologicalProcess-EBI-UniProt-GOA_19.01.2019_00h00	0.0106386	0.0233737	10.4167	5	[COL1A1, DAB2, ENG, LOXL2, VASN]
GO:0016485	protein processing	GO_BiologicalProcess-EBI-UniProt-GOA_19.01.2019_00h00	0.00268388	0.00814983	7.53425	11	[ADAMTS2, APH1B, CASP3, CD59, COMP, CPZ, ECE2, IL1R2, LONP2, NOL3, TNF]
GO:0016528	sarcoplasm	GO_CellularComponent-EBI-UniProt-GOA_19.01.2019_00h00	0.00738759	0.0178593	11.3636	5	[CALU, ITPR2, MANF, NOL3, THBS1]
GO:0016746	transferase activity, transferring acyl groups	GO_MolecularFunction-EBI-UniProt-GOA_19.01.2019_00h00	0.0205098	0.0372769	5.47945	12	[ACAT2, CLYBL, CPT1C, DGAT2, ELOVL1, F13A1, GLYAT, LPCAT2, NMT2, PLA2G15, TGM3, ZDHHC2]
GO:0007340	acrosome reaction	GO_BiologicalProcess-EBI-UniProt-GOA_19.01.2019_00h00	0.0283881	0.0472292	12.5	3	[ABHD2, GALT, STX2]
GO:0010941	regulation of cell death	GO_BiologicalProcess-EBI-UniProt-GOA_19.01.2019_00h00	0.0138036	0.0275703	4.0555	38	[BAG3, BCL2L15, BDNF, CACNA1A, CASP3, CDK5R1, COMP, CYR61, DAB2, E2F3, EPHA7, EYA2, FCER1G, GALT, GDF11, IFIT3, IKZF3, ITGA5, LYN, MET, NCKAP1L, NGFR, NLRP12, NLRP3, NOL3, NOS3, NR4A3, PLAUR, PTPRC, RILPL1, RIPK3, SERPINB2, SMAD6, TCP1, TNF, TNFAIP8L2, TNFSF8, TXN]
GO:0043067	regulation of programmed cell death	GO_BiologicalProcess-EBI-UniProt-GOA_19.01.2019_00h00	0.0212574	0.0381713	4	35	[BAG3, BCL2L15, BDNF, CACNA1A, CASP3, CDK5R1, COMP, DAB2, E2F3, EPHA7, EYA2, FCER1G, GALT, GDF11, IFIT3, IKZF3, ITGA5, LYN, MET, NCKAP1L, NGFR, NLRP12, NLRP3, NOL3, NOS3, NR4A3, PLAUR, PTPRC, RIPK3, SERPINB2, SMAD6, TCP1, TNF, TNFAIP8L2, TNFSF8]
GO:0055037	recycling endosome	GO_CellularComponent-EBI-UniProt-GOA_19.01.2019_00h00	0.0220112	0.0388709	7	7	[EHD4, MCOLN2, RAB4A, RABGEF1, SCAMP5, TNF, ZDHHC2]
GO:0055038	recycling endosome membrane	GO_CellularComponent-EBI-UniProt-GOA_19.01.2019_00h00	0.0228917	0.0401411	10.2564	4	[EHD4, RAB4A, SCAMP5, ZDHHC2]
GO:0004602	glutathione peroxidase activity	GO_MolecularFunction-EBI-UniProt-GOA_19.01.2019_00h00	0.00767936	0.0183274	20	3	[ALOX5AP, GPX3, GPX7]
GO:0019904	protein domain specific binding	GO_MolecularFunction-EBI-UniProt-GOA_19.01.2019_00h00	0.00898767	0.0208503	5.09383	19	[ADAM19, BASP1, CRX, CYBA, GJA1, KCNN2, LAP3, LAT2, LYN, NOL3, OCLN, PLAUR, PLEKHA1, PLEKHA2, PTTG1, RHOQ, SH3BP2, SIRPA, VAPA]
GO:0017124	SH3 domain binding	GO_MolecularFunction-EBI-UniProt-GOA_19.01.2019_00h00	0.000396168	0.00184961	14.2857	7	[ADAM19, CYBA, GJA1, LYN, PTTG1, SH3BP2, SIRPA]
GO:0048407	platelet-derived growth factor binding	GO_MolecularFunction-EBI-UniProt-GOA_19.01.2019_00h00	0.00224712	0.00708269	30	3	[COL1A1, PDGFRA, PDGFRB]
GO:0004714	transmembrane receptor protein tyrosine kinase activity	GO_MolecularFunction-EBI-UniProt-GOA_19.01.2019_00h00	0.0171604	0.0326178	9.25926	5	[EPHA7, MET, PDGFRA, PDGFRB, ROR2]
GO:0009225	nucleotide-sugar metabolic process	GO_BiologicalProcess-EBI-UniProt-GOA_19.01.2019_00h00	0.00634505	0.0157467	14.8148	4	[GALT, GFPT2, PGM3, UGGT2]
GO:0006487	protein N-linked glycosylation	GO_BiologicalProcess-EBI-UniProt-GOA_19.01.2019_00h00	0.0159261	0.0305831	9.43396	5	[ENTPD5, GALT, GFPT2, RPN2, UGGT2]
GO:0002532	production of molecular mediator involved in inflammatory response	GO_BiologicalProcess-EBI-UniProt-GOA_19.01.2019_00h00	0.00103076	0.00394862	14.2857	6	[ADCY7, ALOX5AP, FCER1G, IL1R2, NOS2, TNF]
GO:0050727	regulation of inflammatory response	GO_BiologicalProcess-EBI-UniProt-GOA_19.01.2019_00h00	0.000114768	0.000708527	8.24742	16	[ADCY7, AOAH, BST1, CD59, FCER1G, FOXF1, IL1R2, LYN, NLRP12, NLRP3, NOS2, PPARD, RABGEF1, TNF, TNFAIP8L2, TNIP1]
GO:0061448	connective tissue development	GO_BiologicalProcess-EBI-UniProt-GOA_19.01.2019_00h00	0.028185	0.0471012	5.61798	10	[ANXA6, BMP1, COL1A1, COL7A1, COMP, DGAT2, IL6R, LOXL2, ROR2, SELENOM]
GO:0003416	endochondral bone growth	GO_BiologicalProcess-EBI-UniProt-GOA_19.01.2019_00h00	0.0143878	0.0282091	11.7647	4	[ANXA6, BNC2, COL7A1, COMP]
GO:0060351	cartilage development involved in endochondral bone morphogenesis	GO_BiologicalProcess-EBI-UniProt-GOA_19.01.2019_00h00	0.019196	0.0354936	10.8108	4	[ANXA6, COL1A1, COL7A1, COMP]
GO:0031012	extracellular matrix	GO_CellularComponent-EBI-UniProt-GOA_19.01.2019_00h00	1.18879e-06	3.17151e-05	8.84615	23	[ADAMTS15, ADAMTS2, ADAMTS9, COL1A1, COL7A1, COL9A1, COMP, CRISPLD2, CYR61, EMILIN2, HAPLN3, LINGO4, LOXL2, MMP19, MMP2, MMP25, NID1, NID2, PLOD3, PTX3, THBS1, THBS2, TIMP2]
GO:0062023	collagen-containing extracellular matrix	GO_CellularComponent-EBI-UniProt-GOA_19.01.2019_00h00	0.00162316	0.00548642	8.0292	11	[ADAMTS15, ADAMTS2, COL1A1, COL7A1, COMP, LOXL2, NID1, NID2, PLOD3, THBS1, THBS2]
GO:0030199	collagen fibril organization	GO_BiologicalProcess-EBI-UniProt-GOA_19.01.2019_00h00	0.0014915	0.0052063	13.3333	6	[ADAMTS2, COL1A1, COMP, LOXL2, PLOD2, PLOD3]
GO:0071229	cellular response to acid chemical	GO_BiologicalProcess-EBI-UniProt-GOA_19.01.2019_00h00	0.00824002	0.0193563	7.76699	8	[ABCA1, COL1A1, DGAT2, LYN, MMP2, PDGFD, PID1, TNF]
GO:1901701	cellular response to oxygen-containing compound	GO_BiologicalProcess-EBI-UniProt-GOA_19.01.2019_00h00	0.0138048	0.0274992	4.44444	26	[ABCA1, ADCY7, CD80, CD86, CDK5R1, COL1A1, DGAT2, GHR, GNAI2, IRF8, LYN, MET, MMP2, MSN, NGFR, NLRP3, NOS2, NR4A3, PDGFD, PID1, PLSCR4, RAB8B, RHOQ, RIPK3, TNF, TXN]
GO:0071230	cellular response to amino acid stimulus	GO_BiologicalProcess-EBI-UniProt-GOA_19.01.2019_00h00	0.0248905	0.0425474	10	4	[COL1A1, MMP2, PDGFD, TNF]
GO:0006801	superoxide metabolic process	GO_BiologicalProcess-EBI-UniProt-GOA_19.01.2019_00h00	0.00605564	0.0152308	11.9048	5	[CYBA, F2RL1, NOS2, SH3PXD2B, TNF]
GO:0071800	podosome assembly	GO_BiologicalProcess-EBI-UniProt-GOA_19.01.2019_00h00	0.000838761	0.00335056	25	4	[LCP1, MSN, SH3PXD2B, TNF]
GO:1902117	positive regulation of organelle assembly	GO_BiologicalProcess-EBI-UniProt-GOA_19.01.2019_00h00	0.00891109	0.020737	10.8696	5	[FUZ, LCP1, MSN, SDC4, TNF]
GO:0098805	whole membrane	GO_CellularComponent-EBI-UniProt-GOA_19.01.2019_00h00	0.0117689	0.0248343	4.2362	33	[ABCA1, ANXA6, ATG16L2, BTK, CD8A, CLMN, ECE2, EHD4, HK2, ITPR2, LAPTM5, LAT2, LYN, MARCH3, NOS3, PTPRC, RAB38, RAB4A, RAB8B, RHOQ, SCAMP5, SEC23A, SELP, SLC11A1, SNX20, SNX8, SYT1, TM6SF1, TNF, TPCN2, VPS13C, ZAP70, ZDHHC2]
GO:0012506	vesicle membrane	GO_CellularComponent-EBI-UniProt-GOA_19.01.2019_00h00	0.0217471	0.0386788	5.12821	14	[ANXA6, ECE2, ITPR2, MARCH3, NOS2, NOS3, RAB38, RAB8B, SCAMP5, SEC23A, SELP, SLC11A1, SNX24, SYT1]
GO:0045121	membrane raft	GO_CellularComponent-EBI-UniProt-GOA_19.01.2019_00h00	0.0140017	0.0277435	6.28931	10	[ABCA1, BTK, CD8A, LAT2, LYN, NOS3, PTPRC, RHOQ, TNF, ZAP70]
GO:0005539	glycosaminoglycan binding	GO_MolecularFunction-EBI-UniProt-GOA_19.01.2019_00h00	0.000142953	0.000840832	9.35252	13	[ADAMTS15, ANXA6, COMP, CRISPLD2, CYR61, ENG, HAPLN3, LYVE1, PGLYRP3, PTPRC, SELP, THBS1, THBS2]
GO:0008201	heparin binding	GO_MolecularFunction-EBI-UniProt-GOA_19.01.2019_00h00	0.00180475	0.00596524	9.09091	9	[ADAMTS15, ANXA6, COMP, CRISPLD2, CYR61, PTPRC, SELP, THBS1, THBS2]
GO:0005319	lipid transporter activity	GO_MolecularFunction-EBI-UniProt-GOA_19.01.2019_00h00	0.00653862	0.0161733	7.5	9	[ABCA1, ABCA10, ABCA6, PITPNA, PLSCR4, PRELID3A, SLC27A1, SLCO1A2, SLCO2A1]
GO:0010876	lipid localization	GO_BiologicalProcess-EBI-UniProt-GOA_19.01.2019_00h00	0.0269865	0.045403	4.98221	14	[ABCA1, ABCA10, ABCA6, CPT1C, DGAT2, NOS2, PITPNA, PPARD, PRELID3A, SELENOM, SLC27A1, SLCO1A2, SLCO2A1, TNF]
GO:0006820	anion transport	GO_BiologicalProcess-EBI-UniProt-GOA_19.01.2019_00h00	0.0251746	0.042837	4.5045	20	[ABCA1, CACNA1A, CPT1C, GJA1, LRRC8B, MGC139164, MGC157082, NOS2, PITPNA, PRELID3A, SLC11A1, SLC13A5, SLC16A14, SLC16A3, SLC16A7, SLC19A1, SLC27A1, SLC36A1, SLCO1A2, SLCO2A1]
GO:0002064	epithelial cell development	GO_BiologicalProcess-EBI-UniProt-GOA_19.01.2019_00h00	0.000776977	0.00315436	8.27586	12	[ENG, F2RL1, FOSL2, GALT, GJA1, GRHL2, MARVELD2, MET, MSN, PLOD3, RILPL1, TNF]
GO:0003382	epithelial cell morphogenesis	GO_BiologicalProcess-EBI-UniProt-GOA_19.01.2019_00h00	0.00634505	0.0157467	14.8148	4	[GRHL2, MET, PLOD3, RILPL1]
GO:0060425	lung morphogenesis	GO_BiologicalProcess-EBI-UniProt-GOA_19.01.2019_00h00	0.00347731	0.010068	13.5135	5	[FOXF1, GRHL2, MAP2K1, PLOD3, TNF]
GO:0014812	muscle cell migration	GO_BiologicalProcess-EBI-UniProt-GOA_19.01.2019_00h00	0.019196	0.0354936	10.8108	4	[NR4A3, PDGFA, PDGFRB, PLEKHO1]
GO:0014910	regulation of smooth muscle cell migration	GO_BiologicalProcess-EBI-UniProt-GOA_19.01.2019_00h00	0.0253525	0.0430417	13.0435	3	[NR4A3, PDGFA, PDGFRB]
GO:0031589	cell-substrate adhesion	GO_BiologicalProcess-EBI-UniProt-GOA_19.01.2019_00h00	2.69979e-05	0.000245944	8.90052	17	[ADAMTS9, ANGPT2, BCAM, BST1, COL1A1, EMILIN2, FERMT3, FOXF1, ITGA5, ITGB3, ITGB7, NID1, NID2, PARVB, PARVG, PREX1, SMAD6]
GO:0010810	regulation of cell-substrate adhesion	GO_BiologicalProcess-EBI-UniProt-GOA_19.01.2019_00h00	0.0114056	0.0244126	7.33945	8	[ANGPT2, BST1, COL1A1, EMILIN2, FOXF1, ITGB3, NID1, PREX1]
GO:0034446	substrate adhesion-dependent cell spreading	GO_BiologicalProcess-EBI-UniProt-GOA_19.01.2019_00h00	0.00258794	0.00792292	12	6	[FERMT3, ITGB3, ITGB7, PARVB, PARVG, PREX1]
GO:0032609	interferon-gamma production	GO_BiologicalProcess-EBI-UniProt-GOA_19.01.2019_00h00	3.53984e-06	6.14944e-05	15.7143	11	[F2RL1, FAM49B, IL18R1, IL6R, IRF8, PGLYRP3, RASGRP1, RIPK3, SLAMF6, SLC11A1, TNF]
GO:0032814	regulation of natural killer cell activation	GO_BiologicalProcess-EBI-UniProt-GOA_19.01.2019_00h00	0.0198358	0.0364063	14.2857	3	[IL6R, PGLYRP3, RASGRP1]
GO:0001779	natural killer cell differentiation	GO_BiologicalProcess-EBI-UniProt-GOA_19.01.2019_00h00	0.0150582	0.0292168	15.7895	3	[PGLYRP3, PTPRC, RASGRP1]
GO:0008037	cell recognition	GO_BiologicalProcess-EBI-UniProt-GOA_19.01.2019_00h00	0.0172711	0.0327449	8.10811	6	[CADM1, CCT5, CDK5R1, GALT, MSN, TCP1]
GO:0009988	cell-cell recognition	GO_BiologicalProcess-EBI-UniProt-GOA_19.01.2019_00h00	0.0143878	0.0282091	11.7647	4	[CCT5, GALT, MSN, TCP1]
GO:0048487	beta-tubulin binding	GO_MolecularFunction-EBI-UniProt-GOA_19.01.2019_00h00	0.0283881	0.0472292	12.5	3	[CCT5, CDK5R1, GJA1]
GO:0015144	carbohydrate transmembrane transporter activity	GO_MolecularFunction-EBI-UniProt-GOA_19.01.2019_00h00	0.00927781	0.0210016	13.3333	4	[SLC2A12, SLC2A6, SLC5A1, TMEM144]
GO:0034219	carbohydrate transmembrane transport	GO_BiologicalProcess-EBI-UniProt-GOA_19.01.2019_00h00	0.000261059	0.00133569	11.8421	9	[HK2, NR4A3, PID1, RHOQ, SLC2A12, SLC2A6, SLC5A1, TMEM144, TNF]
GO:0010827	regulation of glucose transmembrane transport	GO_BiologicalProcess-EBI-UniProt-GOA_19.01.2019_00h00	0.00891109	0.020737	10.8696	5	[HK2, NR4A3, PID1, RHOQ, TNF]
GO:0034613	cellular protein localization	GO_BiologicalProcess-EBI-UniProt-GOA_19.01.2019_00h00	0.00569073	0.0146081	4.0678	48	[ATP1B3, BAG3, CACNA1A, CCT5, CDK5R1, CEP72, CLMN, COL1A1, DAB2, EXOC3L2, FCER1G, HK2, IL10RA, ITGB7, LCP1, LONP2, LYN, MAPRE2, MSN, NGFR, PID1, PIGR, PKP2, RAB20, RAB31, RAB38, RAB4A, RAB8B, RHOQ, RILPL1, RIPOR2, SEC23A, SNX8, SPSB1, STAC, STX11, STX19, STX2, SUN2, TBC1D9, TCP1, TNF, TRAM2, TXN, VAPA, VPS13C, XPO6, ZDHHC2]
GO:1903827	regulation of cellular protein localization	GO_BiologicalProcess-EBI-UniProt-GOA_19.01.2019_00h00	0.00524091	0.0139322	5.7554	16	[BAG3, CCT5, CDK5R1, CEP72, DAB2, FCER1G, LCP1, MSN, NGFR, PID1, RHOQ, RIPOR2, STAC, TCP1, TNF, TXN]
GO:0072657	protein localization to membrane	GO_BiologicalProcess-EBI-UniProt-GOA_19.01.2019_00h00	0.00375569	0.010708	5.53936	19	[ATP1B3, CACNA1A, CDK5R1, DAB2, FCER1G, ITGB7, PID1, PIGR, PKP2, RAB31, RAB38, RAB8B, RHOQ, RILPL1, SEC23A, STAC, TNF, TRAM2, ZDHHC2]
GO:1990778	protein localization to cell periphery	GO_BiologicalProcess-EBI-UniProt-GOA_19.01.2019_00h00	0.0111021	0.0238998	5.97015	12	[ATP1B3, DAB2, FCER1G, PID1, PKP2, RAB31, RAB8B, RHOQ, RILPL1, SEC23A, STAC, TNF]
GO:0098552	side of membrane	GO_CellularComponent-EBI-UniProt-GOA_19.01.2019_00h00	1.21007e-05	0.000134914	7.16253	26	[ABCA1, ANTXR2, CD163, CD3E, CD80, CD86, CD8A, CSF3R, ENG, FCER1G, GALT, GFRA1, GFRA2, GHR, GNAI2, GNG7, HCK, IL6R, ITGA5, ITGB3, LYN, PTPRC, SELL, SELP, STAC, TNF]
GO:0044459	plasma membrane part	GO_CellularComponent-EBI-UniProt-GOA_19.01.2019_00h00	5.31103e-06	7.6295e-05	4.5283	84	[ABCA1, ADCY7, ADGRE5, ANTXR2, APH1B, ATP1B3, BST1, CACNA1A, CD163, CD247, CD3E, CD80, CD86, CD8A, CSF3R, CYBA, ENG, EPHA7, F2RL1, FCER1G, FLRT2, GALT, GFRA1, GFRA2, GHR, GJA1, GNAI2, GNG7, GRIN2D, HCK, IL18R1, IL6R, ITGA5, ITGA6, ITGB3, ITGB7, KRT19, KRT8, LCP1, LYN, MARVELD2, MET, MSN, NOS3, NTNG2, OCLN, PCDH1, PDGFRA, PDGFRB, PLAUR, PLEKHO1, PLXNA2, PTPRC, RASGRP2, RIPOR2, ROR2, SCNN1G, SELL, …
GO:0007166	cell surface receptor signaling pathway	GO_BiologicalProcess-EBI-UniProt-GOA_19.01.2019_00h00	1.9568e-06	3.95063e-05	4.66292	83	[ABCA1, ADCYAP1R1, ADGRE5, ANGPT2, APH1B, BAG3, BDNF, BTK, CASP3, CD247, CD3E, CD80, CD86, CD8A, CDK5R1, COL1A1, COMP, CSF3R, CSNK1D, DAB2, ENG, EPHA7, EYA2, F2RL1, FCER1G, FERMT3, FLRT2, FOXF1, GDF11, GFRA2, GHR, GNAI2, GNG7, GRIN2D, HCK, IL10RA, IL18R1, IL1R2, IL1RAP, IL2RA, IL6R, ITGA5, ITGA6, ITGB3, ITGB7, KRT19, KRT8, LAT2, LYN, MET, NCKAP1L, NLRP12, NOL3, NOS3, NOTCH2, NR4A3, OAS2, PDGFA, P…
GO:0031226	intrinsic component of plasma membrane	GO_CellularComponent-EBI-UniProt-GOA_19.01.2019_00h00	0.00108895	0.00408765	4.45076	47	[ABCA1, ADCY7, ADGRE5, APH1B, ATP1B3, BST1, CYBA, EPHA7, F2RL1, FCER1G, FLRT2, GRIN2D, IL18R1, IL6R, ITGA5, ITGA6, ITGB3, ITGB7, MET, NTNG2, PCDH1, PDGFRA, PDGFRB, PLAUR, PLXNA2, ROR2, SELL, SELP, SEMA6B, SLC16A14, SLC16A2, SLC16A3, SLC16A7, SLC19A1, SLC27A1, SLC2A12, SLC2A6, SLC39A14, SLCO1A2, SLCO2A1, THBD, TNF, TSPAN12, TSPAN18, TSPAN2, ZACN, ZDHHC2]
GO:0048661	positive regulation of smooth muscle cell proliferation	GO_BiologicalProcess-EBI-UniProt-GOA_19.01.2019_00h00	0.0143878	0.0282091	11.7647	4	[IL6R, MMP2, NR4A3, TNF]
GO:1900407	regulation of cellular response to oxidative stress	GO_BiologicalProcess-EBI-UniProt-GOA_19.01.2019_00h00	0.00490221	0.0131725	12.5	5	[MET, NOL3, NR4A3, TNF, TXN]
GO:0044089	positive regulation of cellular component biogenesis	GO_BiologicalProcess-EBI-UniProt-GOA_19.01.2019_00h00	0.00587252	0.014921	5.42169	18	[ARPC2, BDNF, CDC42EP5, CDK5R1, F2RL1, FLRT2, FUZ, GMFG, IL1RAP, LCP1, MET, MSN, NCKAP1L, RHOQ, RIPOR2, SDC4, TNF, TPBG]
GO:0050807	regulation of synapse organization	GO_BiologicalProcess-EBI-UniProt-GOA_19.01.2019_00h00	0.0120098	0.0252003	7.27273	8	[BDNF, CDK5R1, EPHA7, FLRT2, IL1RAP, NTNG2, TNF, TPBG]
GO:0007416	synapse assembly	GO_BiologicalProcess-EBI-UniProt-GOA_19.01.2019_00h00	0.0170845	0.0325564	7.36842	7	[BDNF, CACNA1A, EPHA7, FLRT2, IL1RAP, NTNG2, TPBG]
GO:0043525	positive regulation of neuron apoptotic process	GO_BiologicalProcess-EBI-UniProt-GOA_19.01.2019_00h00	0.00925796	0.0210203	18.75	3	[CDK5R1, EPHA7, TNF]
GO:0009986	cell surface	GO_CellularComponent-EBI-UniProt-GOA_19.01.2019_00h00	1.23117e-08	7.66402e-07	7.67717	39	[ABCA1, ADAMTS15, ADAMTS9, ANTXR2, APMAP, BCAM, CD163, CD3E, CD59, CD80, CD86, CD8A, CSF3R, ENG, FCER1A, FCER1G, FUT4, GALT, GFRA1, GFRA2, GHR, IGSF5, IL6R, ITGA5, ITGB3, ITGB7, KCNN2, MSN, NGFR, PDGFA, PLAUR, PTPRC, SDC4, SELL, SELP, THBS1, TNF, TYROBP, VASN]
GO:0009897	external side of plasma membrane	GO_CellularComponent-EBI-UniProt-GOA_19.01.2019_00h00	4.98903e-06	7.60573e-05	8.64198	21	[ABCA1, ANTXR2, CD163, CD3E, CD80, CD86, CD8A, CSF3R, ENG, FCER1G, GALT, GFRA1, GFRA2, GHR, IL6R, ITGA5, ITGB3, PTPRC, SELL, SELP, TNF]
GO:0019838	growth factor binding	GO_MolecularFunction-EBI-UniProt-GOA_19.01.2019_00h00	2.23735e-05	0.000219908	12	12	[COL1A1, CSF3R, CYR61, ENG, GHR, IL1R2, IL2RA, IL6R, NGFR, PDGFRA, PDGFRB, VASN]
GO:0004896	cytokine receptor activity	GO_MolecularFunction-EBI-UniProt-GOA_19.01.2019_00h00	0.000717335	0.00296049	10.3448	9	[CSF3R, GFRA2, GHR, IL10RA, IL18R1, IL1R2, IL1RAP, IL2RA, IL6R]
GO:0004908	interleukin-1 receptor activity	GO_MolecularFunction-EBI-UniProt-GOA_19.01.2019_00h00	0.000407208	0.00188934	50	3	[IL18R1, IL1R2, IL1RAP]
GO:0019221	cytokine-mediated signaling pathway	GO_BiologicalProcess-EBI-UniProt-GOA_19.01.2019_00h00	0.0131201	0.026705	5.08982	17	[CSF3R, F2RL1, FCER1G, GHR, IL10RA, IL18R1, IL1R2, IL1RAP, IL2RA, IL6R, KRT8, NOL3, OAS2, PTPRC, RABGEF1, SLC27A1, TNF]
GO:0030029	actin filament-based process	GO_BiologicalProcess-EBI-UniProt-GOA_19.01.2019_00h00	0.0229355	0.0401237	4.38095	23	[ARHGAP28, ARPC2, BST1, CAP2, CDC42BPG, CDC42EP5, CDK5R1, CNN2, F2RL1, FMNL1, GMFG, ITGB3, KRT19, LCP1, MET, NCKAP1L, PARVB, PARVG, PSTPIP2, RHOBTB3, RHOQ, SUN2, TNF]
GO:0097435	supramolecular fiber organization	GO_BiologicalProcess-EBI-UniProt-GOA_19.01.2019_00h00	0.00276996	0.00830987	5.12295	25	[ADAMTS2, ARHGAP28, ARPC2, CAP2, CCDC88B, CDC42EP5, CDK5R1, COL1A1, COMP, F2RL1, GMFG, KRT19, LCP1, LOXL2, MAP1A, MET, NCKAP1L, NIN, PKP2, PLOD2, PLOD3, PSTPIP2, RHOBTB3, RHOQ, RIPK3]
GO:0003779	actin binding	GO_MolecularFunction-EBI-UniProt-GOA_19.01.2019_00h00	0.00552522	0.014331	5.45455	18	[ANXA6, ARPC2, CAP2, CDK5R1, CLMN, CNN2, COBL, FMNL1, GMFG, LCP1, MAP1A, MSN, MYH10, MYO1H, PARVB, PARVG, PSTPIP2, RCSD1]
GO:0051049	regulation of transport	GO_BiologicalProcess-EBI-UniProt-GOA_19.01.2019_00h00	8.82183e-05	0.000593685	4.84791	51	[ABCA1, ATP1B3, BAG3, CACNA1A, CADM1, CDK5R1, CNN2, CYBA, DAB2, F2RL1, FCER1G, FOXF1, FXYD5, GJA1, GNB5, GPD1L, HK2, IL1R2, IL1RAP, KCNN2, LCP1, LYN, MSN, NCKAP1L, NLRP12, NLRP3, NOS2, NR4A3, OAS2, PID1, PTPRC, PTX3, RAB20, RAB4A, RAB8B, RABGEF1, RASGRP1, RHOQ, SCAMP5, SDC4, SIRPA, SLC11A1, STAC, STON2, SYK, SYT1, SYT11, TNF, TXN, UBASH3B, WWP2]
GO:0055085	transmembrane transport	GO_BiologicalProcess-EBI-UniProt-GOA_19.01.2019_00h00	0.000412294	0.00190113	4.44984	55	[ABCA1, ABCA10, ABCA6, ANXA6, ATP1B3, CACNA1A, CYBA, FXYD5, GJA1, GNB5, GPD1L, GRIN2D, HK2, ITPR2, KCNN2, LONP2, LRRC8B, LYN, MCOLN2, MGC139164, MGC157082, NOL3, NR4A3, ORAI2, PID1, PLCH2, PTPRC, RHOQ, SCNN1G, SFXN3, SLC11A1, SLC13A5, SLC16A14, SLC16A2, SLC16A3, SLC16A7, SLC17A9, SLC19A1, SLC22A16, SLC2A12, SLC2A6, SLC36A1, SLC39A14, SLC43A3, SLC5A1, SLCO1A2, SLCO2A1, STAC, TMEM144, TNF, TPCN2, T…
GO:0034762	regulation of transmembrane transport	GO_BiologicalProcess-EBI-UniProt-GOA_19.01.2019_00h00	0.0111272	0.0238851	5.18293	17	[ATP1B3, CACNA1A, CYBA, FXYD5, GJA1, GNB5, GPD1L, HK2, KCNN2, LYN, NR4A3, PID1, RHOQ, STAC, TNF, UBASH3B, WWP2]
GO:0034220	ion transmembrane transport	GO_BiologicalProcess-EBI-UniProt-GOA_19.01.2019_00h00	0.0144356	0.0282288	4.09091	36	[ABCA1, ANXA6, ATP1B3, CACNA1A, CYBA, FXYD5, GJA1, GNB5, GPD1L, GRIN2D, ITPR2, KCNN2, LRRC8B, LYN, MCOLN2, MGC139164, MGC157082, NOL3, ORAI2, PLCH2, PTPRC, SCNN1G, SLC11A1, SLC13A5, SLC16A3, SLC16A7, SLC19A1, SLC2A12, SLC2A6, SLC36A1, SLC39A14, STAC, TPCN2, UBASH3B, WWP2, ZACN]
GO:0042127	regulation of cell proliferation	GO_BiologicalProcess-EBI-UniProt-GOA_19.01.2019_00h00	0.000189322	0.00103988	4.85744	46	[ABL1, BST1, BTK, CASP3, CD80, CD86, CLMN, CNN2, COMP, E2F3, FOSL2, FOXF1, GALT, GDF11, GJA1, GNAI2, IFIT3, IKZF3, IL6R, ITGB3, LYN, MAP2K1, MMP2, NCKAP1L, NGFR, NOS2, NR4A3, PDE5A, PDGFA, PDGFD, PDGFRA, PDGFRB, PID1, PTPRC, RARRES1, RERG, RIPK3, ROR2, SDC4, SKAP2, SLA, SMAD6, SYK, TNF, VEGFC, ZAP70]
GO:0008285	negative regulation of cell proliferation	GO_BiologicalProcess-EBI-UniProt-GOA_19.01.2019_00h00	0.00122744	0.00451674	5.84958	21	[BTK, CASP3, CD80, CD86, CLMN, E2F3, GALT, GDF11, GJA1, IFIT3, LYN, MAP2K1, NGFR, PDE5A, RARRES1, RERG, ROR2, SDC4, SKAP2, SMAD6, TNF]
GO:0002695	negative regulation of leukocyte activation	GO_BiologicalProcess-EBI-UniProt-GOA_19.01.2019_00h00	1.18338e-05	0.000133937	12.766	12	[BTK, CASP3, CD80, CD86, FOXF1, LYN, PDE5A, PGLYRP3, RABGEF1, RIPOR2, SDC4, TNFAIP8L2]
GO:0051250	negative regulation of lymphocyte activation	GO_BiologicalProcess-EBI-UniProt-GOA_19.01.2019_00h00	7.56031e-05	0.000537862	12.5	10	[BTK, CASP3, CD80, CD86, LYN, PDE5A, PGLYRP3, RIPOR2, SDC4, TNFAIP8L2]
GO:0050672	negative regulation of lymphocyte proliferation	GO_BiologicalProcess-EBI-UniProt-GOA_19.01.2019_00h00	9.0239e-05	0.000601862	17.9487	7	[BTK, CASP3, CD80, CD86, LYN, PDE5A, SDC4]
GO:0007264	small GTPase mediated signal transduction	GO_BiologicalProcess-EBI-UniProt-GOA_19.01.2019_00h00	0.000569359	0.00247274	5.95855	23	[ABCA1, ARHGAP28, CDC42EP5, CYTH4, F2RL1, FGD5, MAPRE2, MET, NGFR, PREX1, RAB20, RAB31, RAB38, RAB4A, RAB8B, RABGEF1, RASAL1, RASGRP1, RASGRP2, RGL1, RHOBTB3, RHOQ, RIPOR2]
GO:0043087	regulation of GTPase activity	GO_BiologicalProcess-EBI-UniProt-GOA_19.01.2019_00h00	0.0198591	0.0363596	4.95356	16	[ADAP1, ARHGAP15, ARHGAP28, F2RL1, GNB5, LYN, MAPRE2, MET, NCKAP1L, PLXNA2, PREX1, RASAL1, RASGRP1, RASGRP2, SEC23A, TBC1D9]
GO:0007265	Ras protein signal transduction	GO_BiologicalProcess-EBI-UniProt-GOA_19.01.2019_00h00	0.000830048	0.00333358	6.17284	20	[ABCA1, CDC42EP5, CYTH4, F2RL1, FGD5, MAPRE2, MET, NGFR, PREX1, RAB20, RAB31, RAB38, RAB4A, RAB8B, RABGEF1, RASAL1, RASGRP1, RHOBTB3, RHOQ, RIPOR2]
GO:0051056	regulation of small GTPase mediated signal transduction	GO_BiologicalProcess-EBI-UniProt-GOA_19.01.2019_00h00	0.0092045	0.0211562	6.12245	12	[ABCA1, ARHGAP28, CYTH4, F2RL1, FGD5, MAPRE2, MET, PREX1, RABGEF1, RASAL1, RASGRP1, RIPOR2]
GO:0051058	negative regulation of small GTPase mediated signal transduction	GO_BiologicalProcess-EBI-UniProt-GOA_19.01.2019_00h00	0.0143878	0.0282091	11.7647	4	[MET, RABGEF1, RASAL1, RIPOR2]
GO:0031341	regulation of cell killing	GO_BiologicalProcess-EBI-UniProt-GOA_19.01.2019_00h00	0.000172103	0.000966622	12.5	9	[CADM1, F2RL1, FAM49B, NOS2, PGLYRP3, PTPRC, RASGRP1, RIPK3, SLAMF6]
GO:0042742	defense response to bacterium	GO_BiologicalProcess-EBI-UniProt-GOA_19.01.2019_00h00	0.00569969	0.0145811	7.19424	10	[CYBA, F2RL1, FCER1G, IRF8, NLRP3, NOS2, PGLYRP3, SLC11A1, TNF, TNFSF8]
GO:0051712	positive regulation of killing of cells of other organism	GO_BiologicalProcess-EBI-UniProt-GOA_19.01.2019_00h00	0.00160616	0.00545366	33.3333	3	[F2RL1, NOS2, PGLYRP3]
GO:0072604	interleukin-6 secretion	GO_BiologicalProcess-EBI-UniProt-GOA_19.01.2019_00h00	0.00295217	0.00882108	18.1818	4	[F2RL1, IL1RAP, NOS2, RABGEF1]
GO:0072527	pyrimidine-containing compound metabolic process	GO_BiologicalProcess-EBI-UniProt-GOA_19.01.2019_00h00	0.0258997	0.0437716	8.33333	5	[APOBEC3Z1, CDA, DCK, UCK2, UPP1]
GO:0034404	nucleobase-containing small molecule biosynthetic process	GO_BiologicalProcess-EBI-UniProt-GOA_19.01.2019_00h00	0.0194084	0.0357978	6.66667	8	[ENTPD5, HK2, HK3, NUDT7, PDE5A, PGAM1, UCK2, UPP1]
GO:0009119	ribonucleoside metabolic process	GO_BiologicalProcess-EBI-UniProt-GOA_19.01.2019_00h00	0.013407	0.0270677	8.57143	6	[AMPD3, APOBEC3Z1, CDA, RHOQ, UCK2, UPP1]
GO:0043173	nucleotide salvage	GO_BiologicalProcess-EBI-UniProt-GOA_19.01.2019_00h00	0.00627212	0.0156698	21.4286	3	[AMPD3, UCK2, UPP1]
GO:0004713	protein tyrosine kinase activity	GO_MolecularFunction-EBI-UniProt-GOA_19.01.2019_00h00	4.68892e-06	7.45239e-05	12.8713	13	[ABL1, BTK, EPHA7, HCK, LYN, MET, PDGFRA, PDGFRB, ROR2, SLA, SYK, TEC, ZAP70]
GO:0032623	interleukin-2 production	GO_BiologicalProcess-EBI-UniProt-GOA_19.01.2019_00h00	0.019196	0.0354936	10.8108	4	[FCER1G, IL1RAP, PTPRC, SLC11A1]
GO:0032633	interleukin-4 production	GO_BiologicalProcess-EBI-UniProt-GOA_19.01.2019_00h00	0.0150582	0.0292168	15.7895	3	[FCER1G, IL1RAP, NLRP3]
GO:0002526	acute inflammatory response	GO_BiologicalProcess-EBI-UniProt-GOA_19.01.2019_00h00	0.00594713	0.0150085	10.1695	6	[CD163, CD59, FCER1G, GALT, NLRP3, TNF]
GO:0032755	positive regulation of interleukin-6 production	GO_BiologicalProcess-EBI-UniProt-GOA_19.01.2019_00h00	0.00546824	0.0142824	10.3448	6	[CYBA, F2RL1, FCER1G, IL1RAP, IL6R, TNF]
GO:0002673	regulation of acute inflammatory response	GO_BiologicalProcess-EBI-UniProt-GOA_19.01.2019_00h00	0.00634505	0.0157467	14.8148	4	[CD59, FCER1G, NLRP3, TNF]
GO:0034113	heterotypic cell-cell adhesion	GO_BiologicalProcess-EBI-UniProt-GOA_19.01.2019_00h00	0.00724199	0.0176214	14.2857	4	[ITGA5, ITGB7, PTPRC, TNF]
GO:0002920	regulation of humoral immune response	GO_BiologicalProcess-EBI-UniProt-GOA_19.01.2019_00h00	0.0150582	0.0292168	15.7895	3	[CD59, PTPRC, TNF]
GO:0042089	cytokine biosynthetic process	GO_BiologicalProcess-EBI-UniProt-GOA_19.01.2019_00h00	0.0293437	0.0482815	8.06452	5	[IL1RAP, NLRP12, PTPRC, TNF, TNFSF8]
GO:0008305	integrin complex	GO_CellularComponent-EBI-UniProt-GOA_19.01.2019_00h00	0.00080979	0.0032698	18.5185	5	[BST1, ITGA5, ITGA6, ITGB3, ITGB7]
GO:0050901	leukocyte tethering or rolling	GO_BiologicalProcess-EBI-UniProt-GOA_19.01.2019_00h00	0.00134908	0.00482182	22.2222	4	[ITGB7, SELL, SELP, TNF]
GO:0030855	epithelial cell differentiation	GO_BiologicalProcess-EBI-UniProt-GOA_19.01.2019_00h00	0.0116758	0.0247778	4.96084	19	[BASP1, BDH2, CASP3, DAB2, ENG, F2RL1, FOSL2, FOXF1, GALT, GJA1, GRHL2, MAP2K1, MARVELD2, MET, MSN, PLOD3, RILPL1, TGM3, TNF]
GO:0043588	skin development	GO_BiologicalProcess-EBI-UniProt-GOA_19.01.2019_00h00	0.0129036	0.0265536	6.36943	10	[ADAMTS2, CASP3, COL1A1, COMP, FOSL2, GRHL2, MAP2K1, MET, TGM3, TNF]
GO:0120193	tight junction organization	GO_BiologicalProcess-EBI-UniProt-GOA_19.01.2019_00h00	0.00552502	0.0143804	15.3846	4	[GRHL2, MARVELD2, OCLN, TNF]
GO:0030324	lung development	GO_BiologicalProcess-EBI-UniProt-GOA_19.01.2019_00h00	0.0108241	0.0237115	7.40741	8	[ADAMTS2, CCBE1, FOXF1, GRHL2, MAP2K1, PLOD3, RCN3, TNF]
GO:0070492	oligosaccharide binding	GO_MolecularFunction-EBI-UniProt-GOA_19.01.2019_00h00	0.00224712	0.00708269	30	3	[LOXL2, SELL, SELP]
GO:0050900	leukocyte migration	GO_BiologicalProcess-EBI-UniProt-GOA_19.01.2019_00h00	1.57426e-06	3.45874e-05	9.29204	21	[BST1, CSF3R, F2RL1, FCER1G, GALT, ITGB3, ITGB7, LYN, MCOLN2, MSN, NCKAP1L, NLRP12, PREX1, RABGEF1, RIPK3, RIPOR2, SELL, SELP, STK10, TNF, VEGFC]
GO:0045123	cellular extravasation	GO_BiologicalProcess-EBI-UniProt-GOA_19.01.2019_00h00	0.000440845	0.00199582	16.6667	6	[ITGB7, RIPK3, RIPOR2, SELL, SELP, TNF]
GO:0072676	lymphocyte migration	GO_BiologicalProcess-EBI-UniProt-GOA_19.01.2019_00h00	0.0125447	0.0259582	8.69565	6	[ITGB3, ITGB7, MSN, RIPK3, RIPOR2, STK10]
GO:0051128	regulation of cellular component organization	GO_BiologicalProcess-EBI-UniProt-GOA_19.01.2019_00h00	0.000299905	0.00147388	4.2885	66	[ARHGAP15, ARHGAP28, ARPC2, BDNF, BST1, CACNA1A, CCDC151, CCT5, CDC42EP5, CDK5R1, CNN2, CYBA, DAB2, EPHA7, F2RL1, FCER1G, FLRT2, FMNL1, FUZ, GJA1, GMFG, HK2, IL1RAP, ITGB3, KIF13B, LCP1, LYN, MAP1A, MAP2K1, MAPRE2, MET, MSN, MYH10, NCKAP1L, NOL3, NTNG2, PLAUR, PLEKHO1, PLXNA2, PREX1, PTPRC, PTTG1, PTX3, RAB20, RAB4A, RABGEF1, RASAL1, RERG, RHOBTB3, RHOQ, RIPOR2, SCAMP5, SDC4, SELP, SEMA6B, SIRPA,…
GO:0051130	positive regulation of cellular component organization	GO_BiologicalProcess-EBI-UniProt-GOA_19.01.2019_00h00	8.60051e-05	0.000584053	5.34247	39	[ARPC2, BDNF, CCT5, CDC42EP5, CDK5R1, CYBA, DAB2, F2RL1, FCER1G, FLRT2, FUZ, GMFG, HK2, IL1RAP, ITGB3, LCP1, LYN, MAP2K1, MAPRE2, MET, MSN, NCKAP1L, PLAUR, PLXNA2, PREX1, PTPRC, PTX3, RASAL1, RHOQ, RIPOR2, SDC4, SIRPA, SLC11A1, SPSB1, SYT1, TCP1, TNF, TPBG, VPS13C]
GO:0010638	positive regulation of organelle organization	GO_BiologicalProcess-EBI-UniProt-GOA_19.01.2019_00h00	0.00923165	0.0210245	5.08021	19	[ARPC2, CCT5, CDC42EP5, CDK5R1, F2RL1, FUZ, GMFG, HK2, LCP1, MET, MSN, NCKAP1L, PLAUR, SDC4, SPSB1, SYT1, TCP1, TNF, VPS13C]
GO:0032715	negative regulation of interleukin-6 production	GO_BiologicalProcess-EBI-UniProt-GOA_19.01.2019_00h00	0.00295217	0.00882108	18.1818	4	[NCKAP1L, NLRP12, RABGEF1, TNF]
GO:0051092	positive regulation of NF-kappaB transcription factor activity	GO_BiologicalProcess-EBI-UniProt-GOA_19.01.2019_00h00	0.0122675	0.0255974	7.86517	7	[IL18R1, IL1RAP, MAP3K13, NLRP3, RIPK3, TNF, TNFSF8]
GO:0002768	immune response-regulating cell surface receptor signaling pathway	GO_BiologicalProcess-EBI-UniProt-GOA_19.01.2019_00h00	3.39636e-05	0.000288305	10.7438	13	[BTK, CD247, FCER1G, LAT2, LYN, NCKAP1L, NR4A3, PIGR, PTPRC, RABGEF1, SYK, TEC, ZAP70]
GO:0019932	second-messenger-mediated signaling	GO_BiologicalProcess-EBI-UniProt-GOA_19.01.2019_00h00	0.0249227	0.0425052	5.03597	14	[ABCA1, ADCY7, ADGRE5, BST1, GRIN2D, ITPR2, LAT2, NOS2, NOS3, PDE5A, PTPRC, SELP, TNF, ZAP70]
GO:0050851	antigen receptor-mediated signaling pathway	GO_BiologicalProcess-EBI-UniProt-GOA_19.01.2019_00h00	0.00116127	0.00431577	9.67742	9	[BTK, CD247, LAT2, LYN, NCKAP1L, PTPRC, SYK, TEC, ZAP70]
GO:0042113	B cell activation	GO_BiologicalProcess-EBI-UniProt-GOA_19.01.2019_00h00	0.0102825	0.0227923	6.28571	11	[BST1, BTK, CASP3, IKZF3, IRF2BP2, LAT2, LYN, NCKAP1L, PTPRC, SKAP2, SYK]
GO:0042100	B cell proliferation	GO_BiologicalProcess-EBI-UniProt-GOA_19.01.2019_00h00	0.014534	0.028347	7.6087	7	[BST1, BTK, CASP3, IKZF3, LYN, NCKAP1L, PTPRC]
GO:0050864	regulation of B cell activation	GO_BiologicalProcess-EBI-UniProt-GOA_19.01.2019_00h00	0.00189289	0.00617463	9.87654	8	[BST1, BTK, CASP3, IKZF3, LYN, NCKAP1L, PTPRC, SYK]
GO:0050869	negative regulation of B cell activation	GO_BiologicalProcess-EBI-UniProt-GOA_19.01.2019_00h00	0.00925796	0.0210203	18.75	3	[BTK, CASP3, LYN]
GO:0001816	cytokine production	GO_BiologicalProcess-EBI-UniProt-GOA_19.01.2019_00h00	5.05331e-06	7.40162e-05	6.92841	30	[ABCA1, ADCY7, BTK, CADM1, CYBA, F2RL1, FAM49B, FCER1G, IL18R1, IL1R2, IL1RAP, IL6R, IRF8, LYN, MCOLN2, NCKAP1L, NLRP12, NLRP3, NOS2, NR4A3, PGLYRP3, PTPRC, RABGEF1, RASGRP1, RIPK3, SCAMP5, SLAMF6, SLC11A1, TNF, TNFSF8]
GO:0051239	regulation of multicellular organismal process	GO_BiologicalProcess-EBI-UniProt-GOA_19.01.2019_00h00	1.20178e-06	3.09561e-05	4.6832	85	[ADAMTS9, ADCY7, ANGPT2, ANXA6, BDNF, BMP1, BTK, CACNA1A, CADM1, CCBE1, CDK5R1, COL1A1, COMP, CSF3R, CYBA, DAB2, DIO2, E2F2, ENG, EPHA7, F2RL1, FAM49B, FCER1G, FLRT2, GJA1, GRHL2, GRIN2D, HK2, IKZF3, IL18R1, IL1R2, IL1RAP, IL2RA, IL6R, IRF8, ITGA5, KIF13B, LOXL2, LYN, MAP2K1, MAPRE2, MCOLN2, MET, NCKAP1L, NGFR, NLRP12, NLRP3, NOL3, NOS2, NR4A3, NTNG2, OAS2, PDE5A, PDGFA, PGLYRP3, PKP2, PLXNA2, PT…
GO:0048585	negative regulation of response to stimulus	GO_BiologicalProcess-EBI-UniProt-GOA_19.01.2019_00h00	0.0104054	0.0229965	4.10959	39	[ADCY7, ANGPT2, AOAH, CD59, DAB2, EYA2, F2RL1, FOXF1, GPD1L, IL1R2, LYN, MET, NLRP12, NLRP3, NOL3, NOS3, NR4A3, NUDT16L1, PDGFA, PGLYRP3, PID1, PLAUR, PPARD, PTPRC, RABGEF1, RASAL1, RIPOR2, ROR2, SEMA6B, SMAD6, STK38, THBD, TNF, TNFAIP8L2, TNIP1, TXN, UBASH3B, VASN, VPS13C]
GO:0051241	negative regulation of multicellular organismal process	GO_BiologicalProcess-EBI-UniProt-GOA_19.01.2019_00h00	0.00127585	0.00458203	4.91071	33	[ADAMTS9, ADCY7, ANGPT2, BTK, CDK5R1, E2F2, EPHA7, F2RL1, GRHL2, IL18R1, IL1R2, LOXL2, LYN, NCKAP1L, NGFR, NLRP12, NLRP3, NOL3, PDE5A, PDGFA, PGLYRP3, PTPRC, RABGEF1, SEMA6B, SLC11A1, SMAD6, THBD, THBS1, THBS2, TNF, TWIST2, UBASH3B, VASN]
GO:2000026	regulation of multicellular organismal development	GO_BiologicalProcess-EBI-UniProt-GOA_19.01.2019_00h00	0.000913628	0.00355458	4.36608	52	[ADAMTS9, ANGPT2, BDNF, BMP1, CACNA1A, CCBE1, CDK5R1, COL1A1, COMP, CSF3R, DAB2, E2F2, ENG, EPHA7, FLRT2, GJA1, GRHL2, HK2, IKZF3, IL1RAP, IL2RA, IL6R, ITGA5, KIF13B, LOXL2, LYN, MAP2K1, MET, NCKAP1L, NGFR, NLRP3, NTNG2, OAS2, PDGFA, PGLYRP3, PLXNA2, PTPRC, RASAL1, RASGRP1, ROR2, SEMA6B, SYK, SYT1, THBS1, THBS2, TNF, TPBG, TSPAN12, UBASH3B, VASN, VEGFC, ZAP70]
GO:0001818	negative regulation of cytokine production	GO_BiologicalProcess-EBI-UniProt-GOA_19.01.2019_00h00	0.000467095	0.0020769	8.75912	12	[ADCY7, BTK, F2RL1, IL1R2, NCKAP1L, NLRP12, NLRP3, PGLYRP3, PTPRC, RABGEF1, SLC11A1, TNF]
GO:0060324	face development	GO_BiologicalProcess-EBI-UniProt-GOA_19.01.2019_00h00	0.00271073	0.00816499	14.2857	5	[COL1A1, CRISPLD2, GRHL2, MAP2K1, MMP2]
GO:0060325	face morphogenesis	GO_BiologicalProcess-EBI-UniProt-GOA_19.01.2019_00h00	0.0129445	0.0265647	16.6667	3	[COL1A1, CRISPLD2, MMP2]
GO:0006810	transport	GO_BiologicalProcess-EBI-UniProt-GOA_19.01.2019_00h00	4.8057e-06	7.47886e-05	4.01348	131	[ABCA1, ABCA10, ABCA6, ANTXR2, ANXA6, ATP1B3, BAG3, CACNA1A, CADM1, CCDC88B, CCT5, CD163, CDK5R1, CLMN, CNN2, COL1A1, COMP, CPT1C, CUX1, CYBA, DAB2, EHD4, EXOC3L2, EYA2, F2RL1, FCER1G, FOXF1, FXYD5, GHR, GJA1, GNB5, GPD1L, GRIN2D, HK2, IL10RA, IL1R2, IL1RAP, IRF8, ITGB3, ITPR2, KCNN2, LCP1, LONP2, LOXL2, LRRC8B, LYN, MARCH3, MCOLN2, MET, MGC139164, MGC157082, MSN, NCKAP1L, NLRP12, NLRP3, NOL3, NO…
GO:0032940	secretion by cell	GO_BiologicalProcess-EBI-UniProt-GOA_19.01.2019_00h00	0.000734069	0.00301291	5.25394	30	[ABCA1, CACNA1A, CADM1, COMP, EXOC3L2, F2RL1, FCER1G, FOXF1, IL1R2, IL1RAP, LYN, MCOLN2, NLRP12, NLRP3, NOS2, NR4A3, RAB8B, RABGEF1, RASGRP1, RCN3, SCAMP5, SDC4, SELENOM, STX11, STX19, STX2, SYK, SYT1, SYT11, TNF]
GO:0046903	secretion	GO_BiologicalProcess-EBI-UniProt-GOA_19.01.2019_00h00	0.0010733	0.00404926	4.96241	33	[ABCA1, CACNA1A, CADM1, COMP, CYBA, EXOC3L2, F2RL1, FCER1G, FOXF1, GJA1, IL1R2, IL1RAP, LYN, MCOLN2, NLRP12, NLRP3, NOS2, NR4A3, OAS2, RAB8B, RABGEF1, RASGRP1, RCN3, SCAMP5, SDC4, SELENOM, STX11, STX19, STX2, SYK, SYT1, SYT11, TNF]
GO:0071702	organic substance transport	GO_BiologicalProcess-EBI-UniProt-GOA_19.01.2019_00h00	9.61531e-05	0.000630056	4.30787	75	[ABCA1, ABCA10, ABCA6, BAG3, CACNA1A, CADM1, CDK5R1, COL1A1, COMP, CPT1C, CYBA, F2RL1, FCER1G, GJA1, HK2, IL10RA, IL1R2, IL1RAP, LCP1, LONP2, LYN, MCOLN2, MGC139164, MGC157082, NLRP12, NLRP3, NOS2, NR4A3, PID1, PITPNA, PRELID3A, RAB20, RAB31, RAB38, RAB3IL1, RAB4A, RAB8B, RABGEF1, RASGRP1, RCN3, RHOQ, RILPL1, SCAMP5, SEC23A, SELENOM, SLC11A1, SLC13A5, SLC16A14, SLC16A3, SLC16A7, SLC19A1, SLC27A1,…
GO:0032496	response to lipopolysaccharide	GO_BiologicalProcess-EBI-UniProt-GOA_19.01.2019_00h00	0.0033074	0.00965088	7.33333	11	[ABCA1, CD80, CD86, IRF8, LYN, NLRP3, NOS2, NOS3, PLSCR4, SLC11A1, TNF]
GO:0071222	cellular response to lipopolysaccharide	GO_BiologicalProcess-EBI-UniProt-GOA_19.01.2019_00h00	0.00237314	0.0073864	8.73786	9	[ABCA1, CD80, CD86, IRF8, LYN, NLRP3, NOS2, PLSCR4, TNF]
GO:0001819	positive regulation of cytokine production	GO_BiologicalProcess-EBI-UniProt-GOA_19.01.2019_00h00	0.00011205	0.000697509	7.42188	19	[CADM1, CYBA, F2RL1, FAM49B, FCER1G, IL18R1, IL1RAP, IL6R, IRF8, MCOLN2, NLRP3, NR4A3, PTPRC, RASGRP1, SCAMP5, SLAMF6, SLC11A1, TNF, TNFSF8]
GO:0032760	positive regulation of tumor necrosis factor production	GO_BiologicalProcess-EBI-UniProt-GOA_19.01.2019_00h00	0.00545744	0.0143042	12.1951	5	[CYBA, FCER1G, PTPRC, RASGRP1, TNFSF8]
GO:0038093	Fc receptor signaling pathway	GO_BiologicalProcess-EBI-UniProt-GOA_19.01.2019_00h00	0.000352225	0.00168662	30.7692	4	[FCER1G, NR4A3, PIGR, PTPRC]
GO:0030217	T cell differentiation	GO_BiologicalProcess-EBI-UniProt-GOA_19.01.2019_00h00	0.000133677	0.000792516	8.9172	14	[CD3E, CD8A, FCER1G, IL18R1, NCKAP1L, NLRP3, PATZ1, PREX1, PTPRC, RASGRP1, RIPK3, SLAMF6, TNFSF8, ZAP70]
GO:0002886	regulation of myeloid leukocyte mediated immunity	GO_BiologicalProcess-EBI-UniProt-GOA_19.01.2019_00h00	0.000126863	0.000758133	20.6897	6	[F2RL1, FCER1G, FOXF1, LYN, RABGEF1, SYK]
GO:0002688	regulation of leukocyte chemotaxis	GO_BiologicalProcess-EBI-UniProt-GOA_19.01.2019_00h00	0.0162411	0.0310284	8.21918	6	[BST1, F2RL1, LYN, NCKAP1L, RIPOR2, VEGFC]
GO:0043300	regulation of leukocyte degranulation	GO_BiologicalProcess-EBI-UniProt-GOA_19.01.2019_00h00	1.28177e-05	0.000140806	30	6	[F2RL1, FCER1G, FOXF1, LYN, RABGEF1, SYK]
GO:0034135	regulation of toll-like receptor 2 signaling pathway	GO_BiologicalProcess-EBI-UniProt-GOA_19.01.2019_00h00	0.000207923	0.00110155	60	3	[CYBA, F2RL1, LYN]
GO:0030246	carbohydrate binding	GO_MolecularFunction-EBI-UniProt-GOA_19.01.2019_00h00	0.0111021	0.0238998	5.97015	12	[ENG, GALNT8, HK2, HK3, KLRD1, LOXL2, P4HA3, PLOD2, PLOD3, PTX3, SELL, SELP]
GO:0048029	monosaccharide binding	GO_MolecularFunction-EBI-UniProt-GOA_19.01.2019_00h00	0.0013685	0.00486795	11.6667	7	[ENG, HK2, HK3, P4HA3, PLOD2, PLOD3, SELP]
GO:0031406	carboxylic acid binding	GO_MolecularFunction-EBI-UniProt-GOA_19.01.2019_00h00	0.0014419	0.00508067	8.14815	11	[ALOX5AP, HAPLN3, LYVE1, NOS2, P4HA3, PADI4, PLOD2, PLOD3, PPARD, SELP, SLC19A1]
GO:0006520	cellular amino acid metabolic process	GO_BiologicalProcess-EBI-UniProt-GOA_19.01.2019_00h00	0.0254389	0.0430905	5.30973	12	[ALDH5A1, BCKDHB, CACNA1A, GFPT2, GLYAT, NOS2, NOS3, P4HA3, PADI4, PLOD2, PLOD3, SDS]
GO:0031418	L-ascorbic acid binding	GO_MolecularFunction-EBI-UniProt-GOA_19.01.2019_00h00	0.0129445	0.0265647	16.6667	3	[P4HA3, PLOD2, PLOD3]
GO:1901605	alpha-amino acid metabolic process	GO_BiologicalProcess-EBI-UniProt-GOA_19.01.2019_00h00	0.0177169	0.0333364	6.06061	10	[ALDH5A1, GFPT2, GLYAT, NOS2, NOS3, P4HA3, PADI4, PLOD2, PLOD3, SDS]
GO:0010035	response to inorganic substance	GO_BiologicalProcess-EBI-UniProt-GOA_19.01.2019_00h00	0.0212834	0.0381264	5.28455	13	[ADCY7, LOXL2, MET, NR4A3, RASAL1, RASGRP2, RIPK3, SELENOM, SYT1, SYT11, TNF, TXN, ZACN]
GO:0060004	reflex	GO_BiologicalProcess-EBI-UniProt-GOA_19.01.2019_00h00	0.0129445	0.0265647	16.6667	3	[CACNA1A, GJA1, NR4A3]
GO:2001023	regulation of response to drug	GO_BiologicalProcess-EBI-UniProt-GOA_19.01.2019_00h00	0.00316397	0.00926858	11.5385	6	[CACNA1A, MET, NR4A3, SYT1, SYT11, TXN]
GO:1903202	negative regulation of oxidative stress-induced cell death	GO_BiologicalProcess-EBI-UniProt-GOA_19.01.2019_00h00	0.00634505	0.0157467	14.8148	4	[MET, NOL3, NR4A3, TXN]
GO:0017156	calcium ion regulated exocytosis	GO_BiologicalProcess-EBI-UniProt-GOA_19.01.2019_00h00	0.0291251	0.0481338	6.60377	7	[CACNA1A, SCAMP5, STX11, STX19, STX2, SYT1, SYT11]
GO:0009719	response to endogenous stimulus	GO_BiologicalProcess-EBI-UniProt-GOA_19.01.2019_00h00	0.0109367	0.0238183	4.17149	36	[ABCA1, ABHD2, BDNF, CASP3, CDK5R1, COL1A1, COMP, DAB2, ENG, FCER1G, FLRT2, GHR, GNAI2, ITGB3, LYN, MMP2, MSN, NGFR, NLRP3, NOS2, NOS3, NR4A3, PAQR8, PDGFD, PDGFRB, PID1, PPARD, RAB8B, RERG, RHOQ, ROR2, SLC27A1, SMAD6, TIMP2, TNF, VASN]
GO:0005102	signaling receptor binding	GO_MolecularFunction-EBI-UniProt-GOA_19.01.2019_00h00	0.00480801	0.012966	4.16667	45	[ABCA1, ANGPT2, BDNF, CADM1, CDK5R1, COMP, CRX, CYR61, ENG, EPHA7, FAM49B, FERMT3, FLRT2, GDF11, GJA1, GMFG, GNAI2, HCK, IL6R, ITGA5, ITGB3, ITGB7, LCP1, LONP2, LYN, MANF, MSN, NOL3, NOS2, NR4A3, NUDT7, PDGFA, PDGFD, PILRA, PLAUR, PLSCR4, PTPRC, RAB8B, ROR2, SEMA6B, SMAD6, SYT1, TNF, TNFSF8, VEGFC]
GO:0006935	chemotaxis	GO_BiologicalProcess-EBI-UniProt-GOA_19.01.2019_00h00	0.0097944	0.0219712	4.96278	20	[ANGPT2, BST1, CDK5R1, CSF3R, EPHA7, F2RL1, FCER1G, FLRT2, LYN, MET, NCKAP1L, NR4A3, PDGFA, PDGFRA, PDGFRB, PLXNA2, PREX1, RIPOR2, SEMA6B, VEGFC]
GO:0007167	enzyme linked receptor protein signaling pathway	GO_BiologicalProcess-EBI-UniProt-GOA_19.01.2019_00h00	0.000254524	0.00132034	5.39216	33	[ANGPT2, BDNF, CASP3, CDK5R1, COL1A1, COMP, DAB2, ENG, EPHA7, FLRT2, GDF11, GFRA2, GHR, GNG7, HCK, ITGB3, LYN, MET, NR4A3, PDGFA, PDGFD, PDGFRA, PDGFRB, PID1, PIGR, PLAUR, RABGEF1, RHOQ, ROR2, SMAD6, UBASH3B, VASN, VEGFC]
GO:0019220	regulation of phosphate metabolic process	GO_BiologicalProcess-EBI-UniProt-GOA_19.01.2019_00h00	0.00351159	0.010128	4.17391	48	[BST1, CASP3, CDK5R1, DAB2, ENG, ENTPD5, EPHA7, F2RL1, GDF11, GHR, IL6R, ITGA5, ITGB3, LYN, MAP2K1, MAP2K3, MAP3K13, ME1, NCKAP1L, NLRP12, NOS2, NOS3, PAK4, PDE5A, PDGFA, PDGFD, PDGFRA, PDGFRB, PGAM1, PID1, PLAUR, PPP2R2B, PTPRC, RABGEF1, RASGRP1, RIPK3, SLC11A1, SLC27A1, SMAD6, STK10, STK38, STK39, TNF, TNFRSF19, TNIP1, TXN, UBASH3B, VEGFC]
GO:0007169	transmembrane receptor protein tyrosine kinase signaling pathway	GO_BiologicalProcess-EBI-UniProt-GOA_19.01.2019_00h00	4.9193e-05	0.000386813	6.59898	26	[ANGPT2, BDNF, CASP3, CDK5R1, COL1A1, EPHA7, FLRT2, GFRA2, GHR, HCK, ITGB3, LYN, MET, NR4A3, PDGFA, PDGFD, PDGFRA, PDGFRB, PID1, PIGR, PLAUR, RABGEF1, RHOQ, ROR2, UBASH3B, VEGFC]
GO:0032635	interleukin-6 production	GO_BiologicalProcess-EBI-UniProt-GOA_19.01.2019_00h00	0.000103658	0.000661818	12.0482	10	[CYBA, F2RL1, FCER1G, IL1RAP, IL6R, NCKAP1L, NLRP12, NOS2, RABGEF1, TNF]
GO:0001960	negative regulation of cytokine-mediated signaling pathway	GO_BiologicalProcess-EBI-UniProt-GOA_19.01.2019_00h00	0.00438825	0.012186	12.8205	5	[F2RL1, IL1R2, NOL3, PTPRC, RABGEF1]
GO:0050663	cytokine secretion	GO_BiologicalProcess-EBI-UniProt-GOA_19.01.2019_00h00	9.62876e-06	0.000119878	11.2903	14	[ABCA1, CADM1, F2RL1, IL1R2, IL1RAP, LYN, MCOLN2, NLRP12, NLRP3, NOS2, RABGEF1, RASGRP1, SCAMP5, TNF]
GO:0050708	regulation of protein secretion	GO_BiologicalProcess-EBI-UniProt-GOA_19.01.2019_00h00	0.0246864	0.0423924	5.33333	12	[CADM1, F2RL1, IL1R2, IL1RAP, LYN, NLRP12, NLRP3, NOS2, RABGEF1, RASGRP1, SCAMP5, TNF]
GO:0043235	receptor complex	GO_CellularComponent-EBI-UniProt-GOA_19.01.2019_00h00	2.82407e-06	5.27394e-05	7.96178	25	[ADCYAP1R1, BST1, CD247, CD3E, CSF3R, ENG, EPHA7, GFRA1, GFRA2, GHR, GRIN2D, IL18R1, IL6R, ITGA5, ITGA6, ITGB3, ITGB7, MET, PDGFRA, PDGFRB, PIGR, PLXNA2, ROR2, VIPR1, ZAP70]
GO:0007229	integrin-mediated signaling pathway	GO_BiologicalProcess-EBI-UniProt-GOA_19.01.2019_00h00	0.00218935	0.00692985	10.7692	7	[FCER1G, FERMT3, ITGA5, ITGA6, ITGB3, ITGB7, TEC]
GO:0098802	plasma membrane receptor complex	GO_CellularComponent-EBI-UniProt-GOA_19.01.2019_00h00	0.00254388	0.00782007	7.58621	11	[BST1, CD247, CD3E, GRIN2D, IL18R1, IL6R, ITGA5, ITGA6, ITGB3, ITGB7, ZAP70]
GO:0042101	T cell receptor complex	GO_CellularComponent-EBI-UniProt-GOA_19.01.2019_00h00	0.00302605	0.00897008	27.2727	3	[CD247, CD3E, ZAP70]
GO:0062013	positive regulation of small molecule metabolic process	GO_BiologicalProcess-EBI-UniProt-GOA_19.01.2019_00h00	0.018345	0.0341739	8	6	[ENTPD5, NOS2, NOS3, NR4A3, PID1, TNF]
GO:2000377	regulation of reactive oxygen species metabolic process	GO_BiologicalProcess-EBI-UniProt-GOA_19.01.2019_00h00	0.00747781	0.0179612	8.64198	7	[CYBA, F2RL1, HK2, PID1, PTX3, RIPK3, TNF]
GO:1903077	negative regulation of protein localization to plasma membrane	GO_BiologicalProcess-EBI-UniProt-GOA_19.01.2019_00h00	0.00224712	0.00708269	30	3	[DAB2, PID1, RHOQ]
GO:0010033	response to organic substance	GO_BiologicalProcess-EBI-UniProt-GOA_19.01.2019_00h00	0.000381686	0.00180455	4.15945	72	[ABCA1, ABHD2, ADCY7, BAG3, BDNF, BTK, CASP3, CD80, CD86, CDK5R1, COL1A1, COMP, CSF3R, DAB2, DGAT2, ENG, F2RL1, FCER1G, FLRT2, FOXF1, GFPT2, GHR, GNAI2, HK2, IFIT3, IL10RA, IL18R1, IL1R2, IL1RAP, IL2RA, IL6R, IRF8, ITGB3, KRT8, LAPTM5, LYN, MANF, MMP2, MSN, NGFR, NLRP12, NLRP3, NOL3, NOS2, NOS3, NR4A3, OAS2, PAQR8, PDGFD, PDGFRB, PID1, PLSCR4, PPARD, PTPRC, RAB20, RAB8B, RABGEF1, RCN3, RERG, RHOQ…
GO:0070887	cellular response to chemical stimulus	GO_BiologicalProcess-EBI-UniProt-GOA_19.01.2019_00h00	2.34862e-05	0.000224925	4.39739	81	[ABCA1, ABHD2, ADCY7, ALOX5AP, BAG3, BDNF, BST1, BTK, CASP3, CD80, CD86, CDK5R1, COL1A1, COMP, CSF3R, CYP2S1, DAB2, DGAT2, ENG, F2RL1, FCER1G, FLRT2, FOXF1, GFPT2, GHR, GNAI2, GPX3, GPX7, GSTO1, HK2, IFIT3, IL10RA, IL18R1, IL1R2, IL1RAP, IL2RA, IL6R, IRF8, ITGB3, KRT8, LAPTM5, LOC511936, LOC530929, LYN, MET, MMP2, MSN, NCKAP1L, NGFR, NLRP12, NLRP3, NOL3, NOS2, NR4A3, OAS2, PAQR8, PDGFD, PDGFRB, P…
GO:0071310	cellular response to organic substance	GO_BiologicalProcess-EBI-UniProt-GOA_19.01.2019_00h00	0.000197801	0.00107071	4.38957	64	[ABCA1, ABHD2, ADCY7, BAG3, BDNF, BTK, CASP3, CD80, CD86, CDK5R1, COL1A1, COMP, CSF3R, DAB2, DGAT2, ENG, F2RL1, FCER1G, FLRT2, FOXF1, GFPT2, GHR, GNAI2, HK2, IFIT3, IL10RA, IL18R1, IL1R2, IL1RAP, IL2RA, IL6R, IRF8, ITGB3, KRT8, LAPTM5, LYN, MMP2, MSN, NGFR, NLRP12, NLRP3, NOL3, NOS2, NR4A3, OAS2, PAQR8, PDGFD, PDGFRB, PID1, PLSCR4, PPARD, PTPRC, RAB20, RAB8B, RABGEF1, RHOQ, RIPOR2, ROR2, SLC27A1,…
GO:0002698	negative regulation of immune effector process	GO_BiologicalProcess-EBI-UniProt-GOA_19.01.2019_00h00	0.013407	0.0270677	8.57143	6	[CD59, FOXF1, PGLYRP3, PTPRC, RABGEF1, TNF]
GO:0050777	negative regulation of immune response	GO_BiologicalProcess-EBI-UniProt-GOA_19.01.2019_00h00	0.0286118	0.0474956	7.22892	6	[CD59, FOXF1, PGLYRP3, PTPRC, RABGEF1, TNF]
GO:0002704	negative regulation of leukocyte mediated immunity	GO_BiologicalProcess-EBI-UniProt-GOA_19.01.2019_00h00	0.0225016	0.0396432	13.6364	3	[FOXF1, PTPRC, RABGEF1]
GO:0002431	Fc receptor mediated stimulatory signaling pathway	GO_BiologicalProcess-EBI-UniProt-GOA_19.01.2019_00h00	3.7452e-06	6.35833e-05	50	5	[FCER1G, LYN, NR4A3, PTPRC, RABGEF1]
GO:0045619	regulation of lymphocyte differentiation	GO_BiologicalProcess-EBI-UniProt-GOA_19.01.2019_00h00	0.00734786	0.017821	7.92079	8	[IKZF3, NCKAP1L, NLRP3, PGLYRP3, PTPRC, RASGRP1, SYK, ZAP70]
GO:0062012	regulation of small molecule metabolic process	GO_BiologicalProcess-EBI-UniProt-GOA_19.01.2019_00h00	0.0186934	0.0347362	5.75916	11	[CACNA1A, CLYBL, ENTPD5, LONP2, ME1, NOS2, NOS3, NR4A3, PGAM1, PID1, TNF]
GO:0051193	regulation of cofactor metabolic process	GO_BiologicalProcess-EBI-UniProt-GOA_19.01.2019_00h00	0.0174967	0.0330051	11.1111	4	[CLYBL, ENTPD5, ME1, PGAM1]
GO:0006140	regulation of nucleotide metabolic process	GO_BiologicalProcess-EBI-UniProt-GOA_19.01.2019_00h00	0.00699548	0.0170772	9.83607	6	[ENTPD5, ME1, NOS2, NOS3, PGAM1, PID1]
GO:0007263	nitric oxide mediated signal transduction	GO_BiologicalProcess-EBI-UniProt-GOA_19.01.2019_00h00	0.00627212	0.0156698	21.4286	3	[NOS2, NOS3, PDE5A]
GO:0009117	nucleotide metabolic process	GO_BiologicalProcess-EBI-UniProt-GOA_19.01.2019_00h00	0.0110538	0.0238647	4.82759	21	[ACOT9, ADCY7, AK6, AMPD3, DCK, DGAT2, ELOVL1, ENTPD5, HK2, HK3, ME1, NADK, NOS2, NOS3, NUDT7, PDE5A, PGAM1, PID1, RHOQ, UCK2, UPP1]
GO:1901293	nucleoside phosphate biosynthetic process	GO_BiologicalProcess-EBI-UniProt-GOA_19.01.2019_00h00	0.00430651	0.0120036	6.04839	15	[ADCY7, AK6, AMPD3, DCK, ELOVL1, ENTPD5, HK2, HK3, NADK, NOS2, NOS3, PGAM1, PID1, UCK2, UPP1]
GO:0032879	regulation of localization	GO_BiologicalProcess-EBI-UniProt-GOA_19.01.2019_00h00	1.14575e-09	1.22268e-07	5.36468	89	[ABCA1, ABHD2, ADAMTS9, ANGPT2, ANXA6, ATP1B3, BAG3, BST1, CACNA1A, CADM1, CCBE1, CCT5, CDK5R1, CEP72, CNN2, COL1A1, CYBA, DAB2, DNAH11, ENG, F2RL1, FCER1G, FERMT3, FLRT2, FOXF1, FUZ, FXYD5, GJA1, GNB5, GPD1L, HK2, IL1R2, IL1RAP, ITGB3, ITPR2, KCNN2, LCP1, LYN, MAPRE2, MCOLN2, MET, MSN, NCKAP1L, NGFR, NLRP12, NLRP3, NOL3, NOS2, NR4A3, OAS2, PDGFA, PDGFD, PDGFRB, PID1, PLCH2, PLXNA2, PPARD, PTPRC,…
GO:0006811	ion transport	GO_BiologicalProcess-EBI-UniProt-GOA_19.01.2019_00h00	0.00584782	0.014909	4.02576	50	[ABCA1, ANXA6, ATP1B3, CACNA1A, CPT1C, CYBA, FCER1G, FXYD5, GJA1, GNB5, GPD1L, GRIN2D, ITPR2, KCNN2, LRRC8B, LYN, MCOLN2, MGC139164, MGC157082, NOL3, NOS2, ORAI2, PITPNA, PLCH2, PRELID3A, PTPRC, SCNN1G, SFXN3, SLC11A1, SLC13A5, SLC16A14, SLC16A3, SLC16A7, SLC19A1, SLC22A16, SLC27A1, SLC2A12, SLC2A6, SLC36A1, SLC39A14, SLC5A1, SLCO1A2, SLCO2A1, STAC, SYT1, SYT11, TPCN2, UBASH3B, WWP2, ZACN]
GO:0016192	vesicle-mediated transport	GO_BiologicalProcess-EBI-UniProt-GOA_19.01.2019_00h00	1.49412e-05	0.000155015	5.15362	52	[ABCA1, ANXA6, CACNA1A, CD163, CNN2, CUX1, CYBA, DAB2, EHD4, EXOC3L2, F2RL1, FCER1G, FOXF1, GHR, IL10RA, IRF8, ITGB3, LOXL2, LYN, MARCH3, MET, MSN, NCKAP1L, NR4A3, PIGR, PLD4, PTPRC, PTX3, RAB20, RAB31, RAB38, RAB4A, RAB8B, RABGEF1, RASGRP1, RHOBTB3, RHOQ, SCAMP5, SDC4, SEC23A, SIRPA, SLC11A1, SNX8, STON2, STX11, STX19, STX2, SYK, SYT1, SYT11, TNF, XKR8]
GO:1903531	negative regulation of secretion by cell	GO_BiologicalProcess-EBI-UniProt-GOA_19.01.2019_00h00	0.0199356	0.0364105	7.14286	7	[F2RL1, FOXF1, IL1R2, NLRP12, NLRP3, RABGEF1, TNF]
GO:0051224	negative regulation of protein transport	GO_BiologicalProcess-EBI-UniProt-GOA_19.01.2019_00h00	0.0220112	0.0388709	7	7	[F2RL1, IL1R2, NLRP12, NLRP3, RABGEF1, TNF, TXN]
GO:0050710	negative regulation of cytokine secretion	GO_BiologicalProcess-EBI-UniProt-GOA_19.01.2019_00h00	0.000269083	0.00134003	18.1818	6	[F2RL1, IL1R2, NLRP12, NLRP3, RABGEF1, TNF]
GO:0070161	anchoring junction	GO_CellularComponent-EBI-UniProt-GOA_19.01.2019_00h00	0.000464759	0.00207889	7.57576	15	[ANXA6, FLRT2, GALT, GJA1, ITGA5, ITGB3, ITGB7, LCP1, MAPRE2, MSN, PARVB, PARVG, PKP2, PKP3, PTPRC]
GO:0034330	cell junction organization	GO_BiologicalProcess-EBI-UniProt-GOA_19.01.2019_00h00	0.00802476	0.0189699	6.50888	11	[F2RL1, GJA1, GRHL2, ITGA5, ITGB3, MAPRE2, MARVELD2, OCLN, PKP2, PKP3, TNF]
GO:0045216	cell-cell junction organization	GO_BiologicalProcess-EBI-UniProt-GOA_19.01.2019_00h00	0.00921101	0.0211062	7.61905	8	[F2RL1, GJA1, GRHL2, MARVELD2, OCLN, PKP2, PKP3, TNF]
GO:0007043	cell-cell junction assembly	GO_BiologicalProcess-EBI-UniProt-GOA_19.01.2019_00h00	0.0218389	0.0387497	7.69231	6	[GRHL2, MARVELD2, OCLN, PKP2, PKP3, TNF]
GO:0002440	production of molecular mediator of immune response	GO_BiologicalProcess-EBI-UniProt-GOA_19.01.2019_00h00	0.0124239	0.0258514	6.76692	9	[BTK, F2RL1, FCER1G, IL18R1, NLRP3, NR4A3, PTPRC, SLC11A1, TNF]
GO:0002700	regulation of production of molecular mediator of immune response	GO_BiologicalProcess-EBI-UniProt-GOA_19.01.2019_00h00	0.0162017	0.0310325	7.44681	7	[F2RL1, FCER1G, IL18R1, NLRP3, NR4A3, PTPRC, TNF]
GO:0033005	positive regulation of mast cell activation	GO_BiologicalProcess-EBI-UniProt-GOA_19.01.2019_00h00	0.0010934	0.00408383	37.5	3	[FCER1G, NR4A3, SYK]
GO:0031346	positive regulation of cell projection organization	GO_BiologicalProcess-EBI-UniProt-GOA_19.01.2019_00h00	0.0047732	0.0129657	6.66667	12	[BDNF, CDC42EP5, F2RL1, FUZ, LYN, MAP2K1, MET, PLXNA2, RASAL1, RHOQ, RIPOR2, SYT1]
GO:0120035	regulation of plasma membrane bounded cell projection organization	GO_BiologicalProcess-EBI-UniProt-GOA_19.01.2019_00h00	0.0132293	0.026854	4.98615	18	[BDNF, CACNA1A, CCDC151, CDC42EP5, CDK5R1, EPHA7, F2RL1, FUZ, KIF13B, LYN, MAP2K1, MET, PLXNA2, RASAL1, RHOQ, RIPOR2, SEMA6B, SYT1]
GO:0009605	response to external stimulus	GO_BiologicalProcess-EBI-UniProt-GOA_19.01.2019_00h00	7.59658e-06	9.95552e-05	4.82014	67	[ABCA1, ADAMTS9, ADCY7, ANGPT2, AOAH, BAG3, BCKDHB, BST1, CACNA1A, CCT5, CD59, CD80, CD86, CDK5R1, COL1A1, CSF3R, CYBA, EPHA7, F2RL1, FCER1G, FLRT2, FOXF1, GJA1, GRIN2D, IFIT3, IKZF3, IL1R2, IRF8, KRT8, LYN, MAP2K1, MET, NCKAP1L, NLRP12, NLRP3, NOS2, NOS3, NR4A3, OAS2, PDGFA, PDGFRA, PDGFRB, PGLYRP3, PLSCR4, PLXNA2, PPARD, PPL, PREX1, PTPRC, PTX3, RAB38, RABGEF1, RIPOR2, SELL, SELP, SEMA6B, SLC11…
GO:0032101	regulation of response to external stimulus	GO_BiologicalProcess-EBI-UniProt-GOA_19.01.2019_00h00	5.90281e-06	8.16556e-05	6.75381	31	[ADCY7, ANGPT2, AOAH, BST1, CD59, CYBA, F2RL1, FCER1G, FOXF1, IL1R2, LYN, MAP2K1, MET, NCKAP1L, NLRP12, NLRP3, NOS2, PDGFA, PPARD, RABGEF1, RIPOR2, SELP, SEMA6B, SYK, TEC, THBD, TNF, TNFAIP8L2, TNIP1, UBASH3B, VEGFC]
GO:0080134	regulation of response to stress	GO_BiologicalProcess-EBI-UniProt-GOA_19.01.2019_00h00	0.00153866	0.00529669	4.68354	37	[ADCY7, AOAH, BST1, CADM1, CD59, CYBA, EYA2, F2RL1, FCER1G, FOXF1, IL1R2, LYN, MAP2K1, MET, NLRP12, NLRP3, NOL3, NOS2, NR4A3, NUDT16L1, PDGFA, PGLYRP3, PPARD, RABGEF1, RASGRP1, SELP, SLAMF6, SYK, TEC, THBD, TNF, TNFAIP8L2, TNFRSF19, TNIP1, TXN, UBASH3B, VPS13C]
GO:0032102	negative regulation of response to external stimulus	GO_BiologicalProcess-EBI-UniProt-GOA_19.01.2019_00h00	0.00175404	0.0058494	6.89655	14	[ADCY7, ANGPT2, AOAH, FOXF1, IL1R2, NLRP12, NLRP3, PDGFA, PPARD, RABGEF1, SEMA6B, THBD, TNFAIP8L2, UBASH3B]
GO:0031347	regulation of defense response	GO_BiologicalProcess-EBI-UniProt-GOA_19.01.2019_00h00	0.000663496	0.00276889	6.01093	22	[ADCY7, AOAH, BST1, CADM1, CD59, CYBA, F2RL1, FCER1G, FOXF1, IL1R2, LYN, NLRP12, NLRP3, NOS2, PGLYRP3, PPARD, RABGEF1, RASGRP1, SLAMF6, TNF, TNFAIP8L2, TNIP1]
GO:0034097	response to cytokine	GO_BiologicalProcess-EBI-UniProt-GOA_19.01.2019_00h00	0.00019736	0.00107612	5.53633	32	[BTK, CSF3R, F2RL1, FCER1G, FOXF1, GFPT2, GHR, HK2, IFIT3, IL10RA, IL18R1, IL1R2, IL1RAP, IL2RA, IL6R, IRF8, KRT8, LAPTM5, NLRP12, NOL3, NOS2, OAS2, PID1, PTPRC, RAB20, RABGEF1, RIPOR2, SLC11A1, SLC27A1, TIMP2, TNF, VEGFC]
GO:0071345	cellular response to cytokine stimulus	GO_BiologicalProcess-EBI-UniProt-GOA_19.01.2019_00h00	0.00019997	0.00107466	5.68182	30	[BTK, CSF3R, F2RL1, FCER1G, FOXF1, GFPT2, GHR, HK2, IFIT3, IL10RA, IL18R1, IL1R2, IL1RAP, IL2RA, IL6R, IRF8, KRT8, LAPTM5, NLRP12, NOL3, NOS2, OAS2, PID1, PTPRC, RAB20, RABGEF1, RIPOR2, SLC27A1, TNF, VEGFC]
GO:0045597	positive regulation of cell differentiation	GO_BiologicalProcess-EBI-UniProt-GOA_19.01.2019_00h00	0.0155489	0.030013	4.49438	24	[ADAMTS9, BDNF, COL1A1, DAB2, ENG, GJA1, ITGB3, LOXL2, LYN, MAP2K1, MET, NCKAP1L, NLRP3, PDE5A, PLXNA2, PREX1, PTPRC, RASAL1, RASGRP1, RIPOR2, SYK, SYT1, TNF, ZAP70]
GO:0022604	regulation of cell morphogenesis	GO_BiologicalProcess-EBI-UniProt-GOA_19.01.2019_00h00	8.58144e-05	0.000588104	7.14286	21	[ARHGAP15, BDNF, CACNA1A, CDC42EP5, CDK5R1, EPHA7, FMNL1, ITGB3, KIF13B, MAP2K1, MET, MSN, MYH10, PLEKHO1, PLXNA2, PREX1, RASAL1, RHOBTB3, RHOQ, SEMA6B, SYT1]
GO:0010770	positive regulation of cell morphogenesis involved in differentiation	GO_BiologicalProcess-EBI-UniProt-GOA_19.01.2019_00h00	0.01431	0.0281303	8.4507	6	[BDNF, ITGB3, MAP2K1, MET, PLXNA2, PREX1]
GO:0050772	positive regulation of axonogenesis	GO_BiologicalProcess-EBI-UniProt-GOA_19.01.2019_00h00	0.0291952	0.048143	9.52381	4	[BDNF, MAP2K1, MET, PLXNA2]
GO:0033627	cell adhesion mediated by integrin	GO_BiologicalProcess-EBI-UniProt-GOA_19.01.2019_00h00	0.000171683	0.000971572	16.2791	7	[FERMT3, ITGA5, ITGB3, ITGB7, LYN, NCKAP1L, SYK]
GO:0033628	regulation of cell adhesion mediated by integrin	GO_BiologicalProcess-EBI-UniProt-GOA_19.01.2019_00h00	0.00477889	0.0129342	16	4	[FERMT3, LYN, NCKAP1L, SYK]
GO:0030168	platelet activation	GO_BiologicalProcess-EBI-UniProt-GOA_19.01.2019_00h00	6.64934e-06	9.03101e-05	16.3934	10	[COMP, FCER1G, FERMT3, ITGB3, LYN, PDGFA, SELP, SYK, TEC, UBASH3B]
GO:0070665	positive regulation of leukocyte proliferation	GO_BiologicalProcess-EBI-UniProt-GOA_19.01.2019_00h00	0.00125318	0.00456647	9.57447	9	[BST1, CD80, CD86, IL6R, LYN, NCKAP1L, PTPRC, SYK, ZAP70]
GO:0070527	platelet aggregation	GO_BiologicalProcess-EBI-UniProt-GOA_19.01.2019_00h00	0.000126863	0.000758133	20.6897	6	[COMP, FERMT3, ITGB3, LYN, SYK, UBASH3B]
GO:0090330	regulation of platelet aggregation	GO_BiologicalProcess-EBI-UniProt-GOA_19.01.2019_00h00	0.00627212	0.0156698	21.4286	3	[LYN, SYK, UBASH3B]
GO:0001775	cell activation	GO_BiologicalProcess-EBI-UniProt-GOA_19.01.2019_00h00	1.04693e-11	3.91027e-09	8.27703	49	[BST1, BTK, CASP3, CD3E, CD80, CD86, CD8A, COMP, F2RL1, FAM49B, FCER1G, FERMT3, FOXF1, GJA1, IKZF3, IL18R1, IL6R, IRF2BP2, ITGB3, LAT2, LCP1, LYN, MSN, NCKAP1L, NLRP3, NR4A3, PATZ1, PDE5A, PDGFA, PGLYRP3, PREX1, PTPRC, RABGEF1, RASGRP1, RIPK3, RIPOR2, SDC4, SELP, SIRPA, SKAP2, SLAMF6, SLC11A1, SYK, TEC, TNF, TNFAIP8L2, TNFSF8, UBASH3B, ZAP70]
GO:0070661	leukocyte proliferation	GO_BiologicalProcess-EBI-UniProt-GOA_19.01.2019_00h00	1.16294e-05	0.000133648	8.75576	19	[BST1, BTK, CASP3, CD80, CD86, F2RL1, GJA1, IKZF3, IL6R, LYN, MSN, NCKAP1L, PDE5A, PTPRC, RIPK3, SDC4, SLC11A1, SYK, ZAP70]
GO:0008284	positive regulation of cell proliferation	GO_BiologicalProcess-EBI-UniProt-GOA_19.01.2019_00h00	0.0115685	0.0246202	4.56204	25	[BST1, CD80, CD86, COMP, E2F3, FOSL2, FOXF1, GALT, GNAI2, IL6R, ITGB3, LYN, MMP2, NCKAP1L, NR4A3, PDGFA, PDGFD, PDGFRA, PDGFRB, PID1, PTPRC, SYK, TNF, VEGFC, ZAP70]
GO:0050865	regulation of cell activation	GO_BiologicalProcess-EBI-UniProt-GOA_19.01.2019_00h00	3.4349e-09	2.85097e-07	9.45122	31	[BST1, BTK, CASP3, CD80, CD86, F2RL1, FAM49B, FCER1G, FOXF1, IKZF3, IL6R, LYN, NCKAP1L, NLRP3, NR4A3, PDE5A, PDGFA, PGLYRP3, PTPRC, RABGEF1, RASGRP1, RIPK3, RIPOR2, SDC4, SELP, SIRPA, SYK, TEC, TNFAIP8L2, UBASH3B, ZAP70]
GO:0002694	regulation of leukocyte activation	GO_BiologicalProcess-EBI-UniProt-GOA_19.01.2019_00h00	1.47808e-07	6.13405e-06	8.82353	27	[BST1, BTK, CASP3, CD80, CD86, F2RL1, FAM49B, FCER1G, FOXF1, IKZF3, IL6R, LYN, NCKAP1L, NLRP3, NR4A3, PDE5A, PGLYRP3, PTPRC, RABGEF1, RASGRP1, RIPK3, RIPOR2, SDC4, SIRPA, SYK, TNFAIP8L2, ZAP70]
GO:0046651	lymphocyte proliferation	GO_BiologicalProcess-EBI-UniProt-GOA_19.01.2019_00h00	2.45765e-05	0.000229483	8.61244	18	[BST1, BTK, CASP3, CD80, CD86, GJA1, IKZF3, IL6R, LYN, MSN, NCKAP1L, PDE5A, PTPRC, RIPK3, SDC4, SLC11A1, SYK, ZAP70]
GO:0050670	regulation of lymphocyte proliferation	GO_BiologicalProcess-EBI-UniProt-GOA_19.01.2019_00h00	8.13469e-06	0.000104769	10.7914	15	[BST1, BTK, CASP3, CD80, CD86, IKZF3, IL6R, LYN, NCKAP1L, PDE5A, PTPRC, RIPK3, SDC4, SYK, ZAP70]
GO:0002683	negative regulation of immune system process	GO_BiologicalProcess-EBI-UniProt-GOA_19.01.2019_00h00	0.000394451	0.00185317	6.92308	18	[BTK, CASP3, CD59, CD80, CD86, F2RL1, FCER1G, FOXF1, LYN, PDE5A, PGLYRP3, PTPRC, RABGEF1, RIPOR2, SDC4, TNF, TNFAIP8L2, UBASH3B]
GO:0002697	regulation of immune effector process	GO_BiologicalProcess-EBI-UniProt-GOA_19.01.2019_00h00	0.000155824	0.000902331	7.46888	18	[CADM1, CD59, F2RL1, FAM49B, FCER1G, FOXF1, IL18R1, LYN, NLRP3, NR4A3, PGLYRP3, PTPRC, RABGEF1, RASGRP1, RIPK3, SLAMF6, SYK, TNF]
GO:0023014	signal transduction by protein phosphorylation	GO_BiologicalProcess-EBI-UniProt-GOA_19.01.2019_00h00	0.0134496	0.0270804	4.55408	24	[CDC42EP5, EPHA7, F2RL1, GDF11, LYN, MAP2K1, MAP2K3, MAP3K13, NLRP12, PAK4, PDE5A, PDGFA, PDGFD, PDGFRA, PDGFRB, PTPRC, RASGRP1, ROR2, STK10, STK38, STK39, TNF, TNFRSF19, TNIP1]
GO:0000165	MAPK cascade	GO_BiologicalProcess-EBI-UniProt-GOA_19.01.2019_00h00	0.0298593	0.0490217	4.31373	22	[CDC42EP5, EPHA7, F2RL1, GDF11, LYN, MAP2K1, MAP2K3, MAP3K13, NLRP12, PAK4, PDE5A, PDGFA, PDGFD, PDGFRA, PDGFRB, PTPRC, RASGRP1, ROR2, STK38, TNF, TNFRSF19, TNIP1]
GO:0014066	regulation of phosphatidylinositol 3-kinase signaling	GO_BiologicalProcess-EBI-UniProt-GOA_19.01.2019_00h00	0.00756699	0.0181171	9.67742	6	[ENTPD5, F2RL1, PDGFA, PDGFD, RASGRP1, SELP]
GO:0070371	ERK1 and ERK2 cascade	GO_BiologicalProcess-EBI-UniProt-GOA_19.01.2019_00h00	0.00364018	0.0104585	6.89655	12	[EPHA7, F2RL1, LYN, MAP2K1, NLRP12, PDGFA, PDGFD, PDGFRA, PDGFRB, PTPRC, RASGRP1, TNIP1]
GO:0032880	regulation of protein localization	GO_BiologicalProcess-EBI-UniProt-GOA_19.01.2019_00h00	0.00201294	0.00645351	5.10397	27	[BAG3, CADM1, CCT5, CDK5R1, CEP72, DAB2, F2RL1, FCER1G, IL1R2, IL1RAP, LCP1, LYN, MSN, NGFR, NLRP12, NLRP3, NOS2, PID1, RABGEF1, RASGRP1, RHOQ, RIPOR2, SCAMP5, STAC, TCP1, TNF, TXN]
GO:0060341	regulation of cellular localization	GO_BiologicalProcess-EBI-UniProt-GOA_19.01.2019_00h00	0.00386272	0.0109713	5.06329	24	[BAG3, CACNA1A, CCT5, CDK5R1, CEP72, CYBA, DAB2, FCER1G, FOXF1, LCP1, LYN, MSN, NGFR, PID1, RABGEF1, RHOQ, RIPOR2, STAC, SYK, SYT1, TCP1, TNF, TXN, UBASH3B]
GO:0060627	regulation of vesicle-mediated transport	GO_BiologicalProcess-EBI-UniProt-GOA_19.01.2019_00h00	1.3152e-06	3.27484e-05	8.30565	25	[CACNA1A, CNN2, CYBA, DAB2, F2RL1, FCER1G, FOXF1, LYN, MSN, NCKAP1L, PTPRC, PTX3, RAB20, RAB4A, RAB8B, RABGEF1, SCAMP5, SDC4, SIRPA, SLC11A1, STON2, SYK, SYT1, SYT11, TNF]
GO:0032386	regulation of intracellular transport	GO_BiologicalProcess-EBI-UniProt-GOA_19.01.2019_00h00	0.0239502	0.041414	5.35714	12	[BAG3, CDK5R1, DAB2, FCER1G, FOXF1, LCP1, LYN, MSN, RABGEF1, SYK, SYT1, TXN]
GO:0050793	regulation of developmental process	GO_BiologicalProcess-EBI-UniProt-GOA_19.01.2019_00h00	6.96712e-05	0.000510239	4.45449	69	[ADAMTS9, ANGPT2, ARHGAP15, BDNF, BMP1, CACNA1A, CCBE1, CDC42EP5, CDK5R1, COL1A1, COMP, CSF3R, DAB2, E2F2, ENG, EPHA7, FLRT2, FMNL1, FOXF1, GDF11, GJA1, GRHL2, HK2, IKZF3, IL1RAP, IL2RA, IL6R, ITGA5, ITGB3, KIF13B, LOXL2, LYN, MAP2K1, MET, MSN, MYH10, NCKAP1L, NGFR, NLRP3, NOTCH2, NTNG2, OAS2, PDE5A, PDGFA, PGLYRP3, PLEKHO1, PLXNA2, PREX1, PTPRC, RASAL1, RASGRP1, RHOBTB3, RHOQ, RIPOR2, ROR2, SEMA…
GO:0022603	regulation of anatomical structure morphogenesis	GO_BiologicalProcess-EBI-UniProt-GOA_19.01.2019_00h00	1.46409e-05	0.000154039	5.92949	37	[ADAMTS9, ANGPT2, ARHGAP15, BDNF, CACNA1A, CCBE1, CDC42EP5, CDK5R1, DAB2, E2F2, ENG, EPHA7, FMNL1, HK2, ITGA5, ITGB3, KIF13B, MAP2K1, MET, MSN, MYH10, NGFR, PLEKHO1, PLXNA2, PREX1, RASAL1, RHOBTB3, RHOQ, RIPOR2, ROR2, SEMA6B, SYT1, THBS1, THBS2, TNF, TSPAN12, VEGFC]
GO:0032989	cellular component morphogenesis	GO_BiologicalProcess-EBI-UniProt-GOA_19.01.2019_00h00	0.000117676	0.000720525	5.26316	39	[ARHGAP15, BDNF, CACNA1A, CAP2, CDC42EP5, CDK5R1, COL7A1, EPHA7, FERMT3, FLRT2, FMNL1, GJA1, GRHL2, ITGB3, ITGB7, KIF13B, KRT19, MAP1A, MAP2K1, MET, MSN, MYH10, NCKAP1L, NR4A3, NTNG2, PARVB, PARVG, PID1, PLEKHO1, PLOD3, PLXNA2, PMP22, PREX1, RASAL1, RHOBTB3, RHOQ, RILPL1, SEMA6B, SYT1]
GO:0000902	cell morphogenesis	GO_BiologicalProcess-EBI-UniProt-GOA_19.01.2019_00h00	0.000161661	0.00092893	5.34125	36	[ARHGAP15, BDNF, CACNA1A, CAP2, CDC42EP5, CDK5R1, COL7A1, EPHA7, FERMT3, FLRT2, FMNL1, GJA1, GRHL2, ITGB3, ITGB7, KIF13B, MAP1A, MAP2K1, MET, MSN, MYH10, NCKAP1L, NR4A3, NTNG2, PARVB, PARVG, PLEKHO1, PLOD3, PLXNA2, PREX1, RASAL1, RHOBTB3, RHOQ, RILPL1, SEMA6B, SYT1]
GO:0051094	positive regulation of developmental process	GO_BiologicalProcess-EBI-UniProt-GOA_19.01.2019_00h00	0.0129524	0.026508	4.1769	34	[ADAMTS9, BDNF, BMP1, CCBE1, COL1A1, DAB2, ENG, FLRT2, GJA1, HK2, IL1RAP, IL6R, ITGA5, ITGB3, LOXL2, LYN, MAP2K1, MET, NCKAP1L, NLRP3, PDE5A, PDGFA, PLXNA2, PREX1, PTPRC, RASAL1, RASGRP1, RIPOR2, SYK, SYT1, TNF, TPBG, VEGFC, ZAP70]
GO:0051240	positive regulation of multicellular organismal process	GO_BiologicalProcess-EBI-UniProt-GOA_19.01.2019_00h00	0.000339174	0.00164522	4.7	47	[BDNF, BMP1, CADM1, CCBE1, COL1A1, CYBA, DAB2, DIO2, ENG, F2RL1, FAM49B, FCER1G, FLRT2, GJA1, HK2, IL18R1, IL1RAP, IL6R, IRF8, ITGA5, LOXL2, LYN, MAP2K1, MAPRE2, MCOLN2, MET, NCKAP1L, NLRP3, NR4A3, PDE5A, PDGFA, PLXNA2, PTPRC, RASAL1, RASGRP1, SCAMP5, SELP, SLAMF6, SLC11A1, SLC27A1, SYK, SYT1, TNF, TNFSF8, TPBG, VEGFC, ZAP70]
GO:0051050	positive regulation of transport	GO_BiologicalProcess-EBI-UniProt-GOA_19.01.2019_00h00	0.0012626	0.00457845	5.27344	27	[ABCA1, ATP1B3, BAG3, CADM1, CDK5R1, CYBA, DAB2, F2RL1, FCER1G, GPD1L, IL1RAP, MSN, NCKAP1L, NLRP3, NR4A3, PTPRC, PTX3, RASGRP1, RHOQ, SCAMP5, SDC4, SIRPA, SLC11A1, STAC, SYK, SYT1, TNF]
GO:0046631	alpha-beta T cell activation	GO_BiologicalProcess-EBI-UniProt-GOA_19.01.2019_00h00	0.000659097	0.00276599	10.4651	9	[IL18R1, IL6R, NCKAP1L, NLRP3, PTPRC, SLAMF6, SYK, TNFSF8, ZAP70]
GO:0030098	lymphocyte differentiation	GO_BiologicalProcess-EBI-UniProt-GOA_19.01.2019_00h00	6.25008e-05	0.000462259	7.7551	19	[BTK, CD3E, CD8A, FCER1G, IKZF3, IL18R1, IRF2BP2, NCKAP1L, NLRP3, PATZ1, PGLYRP3, PREX1, PTPRC, RASGRP1, RIPK3, SLAMF6, SYK, TNFSF8, ZAP70]
GO:1902107	positive regulation of leukocyte differentiation	GO_BiologicalProcess-EBI-UniProt-GOA_19.01.2019_00h00	0.00965719	0.0217287	8.23529	7	[NCKAP1L, NLRP3, PTPRC, RASGRP1, SYK, TNF, ZAP70]
GO:0043368	positive T cell selection	GO_BiologicalProcess-EBI-UniProt-GOA_19.01.2019_00h00	0.00295217	0.00882108	18.1818	4	[CD3E, PTPRC, SLAMF6, ZAP70]
GO:0044421	extracellular region part	GO_CellularComponent-EBI-UniProt-GOA_19.01.2019_00h00	0.00029705	0.00146951	4.53401	54	[ADAMTS15, ADAMTS2, ADAMTS4, ADAMTS9, ANGPT2, BDNF, COL1A1, COL7A1, COL9A1, COMP, CPZ, CRISPLD2, CTSW, CYR61, ECM1, EMILIN2, ENG, F5, FLRT2, GALT, GDF11, GLIPR1, GPX3, HAPLN3, IL6R, LINGO4, LOXL2, MANF, MMP19, MMP2, MMP25, NID1, NID2, NTNG2, PDGFA, PDGFD, PGLYRP3, PIGR, PLA2G15, PLOD3, PTX3, RAB4A, RNPEP, SELP, SEMA6B, SERPINB2, SERPINB4, STX2, THBS1, THBS2, TIMP2, TNF, VASN, VEGFC]
GO:0032963	collagen metabolic process	GO_BiologicalProcess-EBI-UniProt-GOA_19.01.2019_00h00	4.01929e-05	0.000326348	15	9	[ADAMTS2, COL1A1, MMP19, MMP2, MMP25, PLOD2, PLOD3, RCN3, TRAM2]
GO:0005615	extracellular space	GO_CellularComponent-EBI-UniProt-GOA_19.01.2019_00h00	0.00162324	0.00546199	4.38931	46	[ADAMTS15, ADAMTS4, ADAMTS9, ANGPT2, BDNF, COL1A1, COL7A1, COL9A1, COMP, CPZ, CRISPLD2, CTSW, ECM1, ENG, F5, FLRT2, GALT, GDF11, GLIPR1, GPX3, IL6R, LINGO4, LOXL2, MANF, MMP19, MMP2, MMP25, PDGFA, PDGFD, PGLYRP3, PIGR, PLA2G15, PLOD3, PTX3, RAB4A, RNPEP, SELP, SEMA6B, SERPINB2, SERPINB4, STX2, THBS1, TIMP2, TNF, VASN, VEGFC]
GO:0030574	collagen catabolic process	GO_BiologicalProcess-EBI-UniProt-GOA_19.01.2019_00h00	0.00552502	0.0143804	15.3846	4	[ADAMTS2, MMP19, MMP2, MMP25]
GO:0032964	collagen biosynthetic process	GO_BiologicalProcess-EBI-UniProt-GOA_19.01.2019_00h00	0.00295217	0.00882108	18.1818	4	[ADAMTS2, COL1A1, RCN3, TRAM2]
GO:0043062	extracellular structure organization	GO_BiologicalProcess-EBI-UniProt-GOA_19.01.2019_00h00	1.6847e-07	6.62352e-06	10.2326	22	[ABCA1, ADAMTS2, ADAMTS9, COL1A1, COL9A1, COMP, CRISPLD2, FLRT2, FOXF1, GALT, ITGB3, LCP1, LOXL2, MMP19, MMP2, MMP25, NID1, PLOD2, PLOD3, PTX3, SDC4, TNF]
GO:0030198	extracellular matrix organization	GO_BiologicalProcess-EBI-UniProt-GOA_19.01.2019_00h00	2.75265e-07	9.79158e-06	10.7527	20	[ADAMTS2, ADAMTS9, COL1A1, COL9A1, COMP, CRISPLD2, FLRT2, FOXF1, GALT, ITGB3, LCP1, LOXL2, MMP19, MMP2, MMP25, NID1, PLOD2, PLOD3, PTX3, TNF]
GO:0042493	response to drug	GO_BiologicalProcess-EBI-UniProt-GOA_19.01.2019_00h00	0.00188203	0.00616613	5.27426	25	[ABHD2, ADCY7, CACNA1A, CDK5R1, CYP2S1, GJA1, GNAI2, LOC511936, LOC530929, MET, MGC139164, MGC157082, NCKAP1L, NOS2, NR4A3, RIPK3, SELL, SLC11A1, SLC13A5, SLC19A1, SLC36A1, SYT1, SYT11, TNF, TXN]
GO:0008509	anion transmembrane transporter activity	GO_MolecularFunction-EBI-UniProt-GOA_19.01.2019_00h00	0.0277018	0.0463973	4.96454	14	[ABCA1, LRRC8B, MGC139164, MGC157082, SFXN3, SLC13A5, SLC16A14, SLC16A3, SLC16A7, SLC19A1, SLC27A1, SLC36A1, SLCO1A2, SLCO2A1]
GO:0015893	drug transport	GO_BiologicalProcess-EBI-UniProt-GOA_19.01.2019_00h00	0.0129036	0.0265536	6.36943	10	[CACNA1A, GJA1, MGC139164, MGC157082, SLC11A1, SLC13A5, SLC19A1, SLC36A1, SYT1, SYT11]
GO:0015849	organic acid transport	GO_BiologicalProcess-EBI-UniProt-GOA_19.01.2019_00h00	0.00178293	0.00591934	6.63717	15	[CACNA1A, CPT1C, MGC139164, MGC157082, NOS2, SLC11A1, SLC13A5, SLC16A14, SLC16A3, SLC16A7, SLC19A1, SLC27A1, SLC36A1, SLCO1A2, SLCO2A1]
GO:0046943	carboxylic acid transmembrane transporter activity	GO_MolecularFunction-EBI-UniProt-GOA_19.01.2019_00h00	0.000436995	0.00199046	8.82353	12	[MGC139164, MGC157082, SFXN3, SLC13A5, SLC16A14, SLC16A3, SLC16A7, SLC19A1, SLC27A1, SLC36A1, SLCO1A2, SLCO2A1]
GO:1903825	organic acid transmembrane transport	GO_BiologicalProcess-EBI-UniProt-GOA_19.01.2019_00h00	0.0209556	0.0379027	7.07071	7	[MGC139164, MGC157082, SLC13A5, SLC16A3, SLC16A7, SLC19A1, SLC36A1]
GO:0008028	monocarboxylic acid transmembrane transporter activity	GO_MolecularFunction-EBI-UniProt-GOA_19.01.2019_00h00	0.00103076	0.00394862	14.2857	6	[SLC16A14, SLC16A3, SLC16A7, SLC27A1, SLCO1A2, SLCO2A1]
GO:1902023	L-arginine transport	GO_BiologicalProcess-EBI-UniProt-GOA_19.01.2019_00h00	0.00503144	0.0134713	23.0769	3	[MGC139164, MGC157082, SLC11A1]
GO:0030155	regulation of cell adhesion	GO_BiologicalProcess-EBI-UniProt-GOA_19.01.2019_00h00	1.02172e-08	6.93841e-07	8.45771	34	[ADAM19, ANGPT2, BST1, CASP3, CD80, CD86, COL1A1, EMILIN2, EPHA7, FAM49B, FERMT3, FOXF1, IL6R, ITGB3, LYN, MET, NCKAP1L, NID1, NLRP3, NOS3, NR4A3, PDE5A, PLXNA2, PREX1, PTPRC, RASGRP1, RIPOR2, SDC4, SIRPA, SYK, TNF, TNFAIP8L2, UBASH3B, ZAP70]
GO:0002684	positive regulation of immune system process	GO_BiologicalProcess-EBI-UniProt-GOA_19.01.2019_00h00	1.4437e-05	0.000154064	6.08696	35	[BST1, BTK, CADM1, CD247, CD59, CD80, CD86, CYBA, F2RL1, FAM49B, FCER1G, FOXF1, IL18R1, IL6R, ITGB3, LAT2, LYN, NCKAP1L, NLRP3, NR4A3, PGLYRP3, PTPRC, RABGEF1, RASGRP1, RIPOR2, SELP, SIRPA, SLAMF6, SLC11A1, SYK, TEC, TNF, TNIP1, VEGFC, ZAP70]
GO:0045785	positive regulation of cell adhesion	GO_BiologicalProcess-EBI-UniProt-GOA_19.01.2019_00h00	3.76039e-05	0.000312113	8.05085	19	[ADAM19, CD80, CD86, EMILIN2, FAM49B, FOXF1, IL6R, ITGB3, NCKAP1L, NID1, NLRP3, NR4A3, PREX1, PTPRC, RASGRP1, SIRPA, SYK, TNF, ZAP70]
GO:0022409	positive regulation of cell-cell adhesion	GO_BiologicalProcess-EBI-UniProt-GOA_19.01.2019_00h00	6.1004e-05	0.0004557	9.58904	14	[ADAM19, CD80, CD86, FAM49B, IL6R, NCKAP1L, NLRP3, NR4A3, PTPRC, RASGRP1, SIRPA, SYK, TNF, ZAP70]
GO:0050867	positive regulation of cell activation	GO_BiologicalProcess-EBI-UniProt-GOA_19.01.2019_00h00	7.9232e-05	0.000553143	8.51064	16	[BST1, CD80, CD86, F2RL1, FAM49B, FCER1G, IL6R, NCKAP1L, NLRP3, NR4A3, PTPRC, RASGRP1, SELP, SIRPA, SYK, ZAP70]
GO:0051251	positive regulation of lymphocyte activation	GO_BiologicalProcess-EBI-UniProt-GOA_19.01.2019_00h00	0.00212834	0.00679432	7.36196	12	[BST1, CD80, CD86, FAM49B, IL6R, NCKAP1L, NLRP3, PTPRC, RASGRP1, SIRPA, SYK, ZAP70]
GO:0050671	positive regulation of lymphocyte proliferation	GO_BiologicalProcess-EBI-UniProt-GOA_19.01.2019_00h00	0.00392931	0.0111182	8.79121	8	[BST1, CD80, CD86, IL6R, NCKAP1L, PTPRC, SYK, ZAP70]
GO:0006950	response to stress	GO_BiologicalProcess-EBI-UniProt-GOA_19.01.2019_00h00	1.05642e-05	0.000123304	4.26937	97	[ABCA1, ABHD2, ADCY7, ALOX5AP, ANXA6, AOAH, BAG3, BST1, CACNA1A, CADM1, CASP3, CD163, CD59, CDC42EP5, CNN2, COMP, CYBA, ELK3, EYA2, F13A1, F2RL1, F5, FCER1G, FERMT3, FOXF1, GALT, GJA1, GNG7, GPX3, GPX7, HK2, IFIT3, IL1R2, IRF8, ITGA5, ITGB3, LOXL2, LYN, MANF, MAP2K1, MAP2K3, MAP3K13, MET, MMP2, MMP25, NLRP12, NLRP3, NOL3, NOS2, NOS3, NR4A3, NUDT16L1, OAS2, PAK4, PDGFA, PGLYRP3, PLOD2, PPARD, PPL,…
GO:0002682	regulation of immune system process	GO_BiologicalProcess-EBI-UniProt-GOA_19.01.2019_00h00	9.07928e-07	2.51193e-05	5.88957	48	[ADCY7, BST1, BTK, CADM1, CASP3, CD247, CD59, CD80, CD86, CSF3R, CYBA, F2RL1, FAM49B, FCER1G, FOXF1, IKZF3, IL18R1, IL2RA, IL6R, ITGB3, LAT2, LYN, MSN, NCKAP1L, NLRP3, NR4A3, PDE5A, PGLYRP3, PIGR, PTPRC, RABGEF1, RASGRP1, RIPK3, RIPOR2, SDC4, SELP, SIRPA, SLAMF6, SLC11A1, STK10, SYK, TEC, TNF, TNFAIP8L2, TNIP1, UBASH3B, VEGFC, ZAP70]
GO:0006952	defense response	GO_BiologicalProcess-EBI-UniProt-GOA_19.01.2019_00h00	0.00623182	0.0156214	4.30233	37	[ADCY7, ALOX5AP, AOAH, BST1, CADM1, CD163, CD59, CYBA, F2RL1, FCER1G, FOXF1, GALT, GNG7, IFIT3, IL1R2, IRF8, LYN, MMP25, NLRP12, NLRP3, NOS2, OAS2, PGLYRP3, PPARD, PTPRC, PTX3, RAB20, RABGEF1, RASGRP1, SELP, SLAMF6, SLC11A1, THBS1, TNF, TNFAIP8L2, TNFSF8, TNIP1]
GO:0051707	response to other organism	GO_BiologicalProcess-EBI-UniProt-GOA_19.01.2019_00h00	0.015869	0.0305519	4.48598	24	[ABCA1, ADAMTS9, CCT5, CD80, CD86, CYBA, F2RL1, FCER1G, IFIT3, IKZF3, IRF8, KRT8, LYN, NLRP3, NOS2, NOS3, OAS2, PGLYRP3, PLSCR4, PTPRC, PTX3, SLC11A1, TNF, TNFSF8]
GO:0009617	response to bacterium	GO_BiologicalProcess-EBI-UniProt-GOA_19.01.2019_00h00	0.00310027	0.00911774	5.63798	19	[ABCA1, ADAMTS9, CD80, CD86, CYBA, F2RL1, FCER1G, IKZF3, IRF8, LYN, NLRP3, NOS2, NOS3, OAS2, PGLYRP3, PLSCR4, SLC11A1, TNF, TNFSF8]
GO:0002367	cytokine production involved in immune response	GO_BiologicalProcess-EBI-UniProt-GOA_19.01.2019_00h00	0.00200073	0.00646988	10.9375	7	[F2RL1, FCER1G, IL18R1, NLRP3, NR4A3, SLC11A1, TNF]
GO:0002819	regulation of adaptive immune response	GO_BiologicalProcess-EBI-UniProt-GOA_19.01.2019_00h00	0.00198015	0.00643118	8.33333	10	[ADCY7, FAM49B, FCER1G, IL18R1, IL6R, NLRP3, PTPRC, RIPK3, SLC11A1, TNF]
GO:0002706	regulation of lymphocyte mediated immunity	GO_BiologicalProcess-EBI-UniProt-GOA_19.01.2019_00h00	0.00117596	0.00434874	8.92857	10	[CADM1, FAM49B, FCER1G, IL18R1, NLRP3, PTPRC, RASGRP1, RIPK3, SLAMF6, TNF]
GO:0002374	cytokine secretion involved in immune response	GO_BiologicalProcess-EBI-UniProt-GOA_19.01.2019_00h00	0.00925796	0.0210203	18.75	3	[F2RL1, NLRP3, TNF]
GO:0002285	lymphocyte activation involved in immune response	GO_BiologicalProcess-EBI-UniProt-GOA_19.01.2019_00h00	0.0118662	0.0249691	6.81818	9	[F2RL1, FCER1G, IL18R1, LCP1, NLRP3, PGLYRP3, PTPRC, SLAMF6, SLC11A1]
GO:0045807	positive regulation of endocytosis	GO_BiologicalProcess-EBI-UniProt-GOA_19.01.2019_00h00	0.0001867	0.00103308	11.236	10	[CYBA, DAB2, F2RL1, FCER1G, NCKAP1L, PTPRC, PTX3, SIRPA, SLC11A1, TNF]
GO:0050764	regulation of phagocytosis	GO_BiologicalProcess-EBI-UniProt-GOA_19.01.2019_00h00	2.10201e-06	4.1321e-05	18.5185	10	[CNN2, CYBA, F2RL1, FCER1G, NCKAP1L, PTPRC, PTX3, SIRPA, SLC11A1, TNF]
GO:0009888	tissue development	GO_BiologicalProcess-EBI-UniProt-GOA_19.01.2019_00h00	0.00158865	0.00541882	4.29923	50	[ADAMTS9, ANXA6, BASP1, BDH2, BMP1, BNC2, CASP3, COL1A1, COL7A1, COMP, DAB2, DGAT2, ENG, EPHA7, EYA2, F2RL1, FOSL2, FOXF1, FUZ, GALT, GDF11, GJA1, GRHL2, HLF, IL6R, ITGA5, LOXL2, MAP2K1, MARVELD2, MET, MMP2, MSN, NR4A3, PLOD3, PLXNA2, PTPRC, RCN3, RILPL1, RIPOR2, ROR2, SDC4, SELENOM, SEMA6B, SMAD6, TEC, TGM3, TNF, TUFT1, VASN, VEGFC]
GO:0035295	tube development	GO_BiologicalProcess-EBI-UniProt-GOA_19.01.2019_00h00	0.000995491	0.00383315	4.98489	33	[ADAMTS2, ADAMTS9, ANGPT2, CCBE1, COMP, E2F2, ELK3, ENG, EPHA7, FOXF1, FUZ, GALT, GDF11, GJA1, GRHL2, HK2, ITGA5, LOXL2, MAP2K1, MET, MMP2, NGFR, NR4A3, PLOD3, PLXNA2, RCN3, SDC4, SMAD6, THBS1, THBS2, TNF, TSPAN12, VEGFC]
GO:0035239	tube morphogenesis	GO_BiologicalProcess-EBI-UniProt-GOA_19.01.2019_00h00	0.00440566	0.012189	4.87805	26	[ADAMTS9, ANGPT2, CCBE1, COMP, E2F2, ELK3, ENG, EPHA7, FOXF1, FUZ, GALT, GJA1, GRHL2, HK2, ITGA5, LOXL2, MET, MMP2, NGFR, NR4A3, SDC4, THBS1, THBS2, TNF, TSPAN12, VEGFC]
GO:0060429	epithelium development	GO_BiologicalProcess-EBI-UniProt-GOA_19.01.2019_00h00	0.0232069	0.0404092	4.13695	29	[BASP1, BDH2, CASP3, DAB2, ENG, EPHA7, F2RL1, FOSL2, FOXF1, FUZ, GALT, GDF11, GJA1, GRHL2, ITGA5, MAP2K1, MARVELD2, MET, MSN, PLOD3, PLXNA2, RCN3, RILPL1, ROR2, SDC4, SMAD6, TGM3, TNF, VEGFC]
GO:0002009	morphogenesis of an epithelium	GO_BiologicalProcess-EBI-UniProt-GOA_19.01.2019_00h00	0.0283324	0.0472418	4.83871	15	[DAB2, ENG, EPHA7, FOXF1, FUZ, GJA1, GRHL2, ITGA5, MET, MSN, PLOD3, ROR2, SDC4, TNF, VEGFC]
GO:0001885	endothelial cell development	GO_BiologicalProcess-EBI-UniProt-GOA_19.01.2019_00h00	9.0239e-05	0.000601862	17.9487	7	[ENG, F2RL1, MARVELD2, MET, MSN, PLOD3, TNF]
GO:0072593	reactive oxygen species metabolic process	GO_BiologicalProcess-EBI-UniProt-GOA_19.01.2019_00h00	0.00124265	0.00455031	7.84314	12	[CYBA, F2RL1, GPX3, HK2, NOS2, NOS3, PID1, PREX1, PTX3, RIPK3, SH3PXD2B, TNF]
GO:1903409	reactive oxygen species biosynthetic process	GO_BiologicalProcess-EBI-UniProt-GOA_19.01.2019_00h00	0.0106386	0.0233737	10.4167	5	[CYBA, NOS2, NOS3, PTX3, TNF]
GO:1903428	positive regulation of reactive oxygen species biosynthetic process	GO_BiologicalProcess-EBI-UniProt-GOA_19.01.2019_00h00	0.0225016	0.0396432	13.6364	3	[CYBA, PTX3, TNF]
GO:0036094	small molecule binding	GO_MolecularFunction-EBI-UniProt-GOA_19.01.2019_00h00	0.000360457	0.00171504	4.00754	85	[ABCA1, ABCA10, ABCA6, ABL1, ADCY7, AK6, ALOX5AP, ANXA6, BAG3, BDH2, BTK, CCT5, CDC42BPG, CSNK1D, DCK, DNAH11, EHD4, ENG, EPHA7, GIMAP7, GNAI2, GPD1L, HAPLN3, HCK, HK2, HK3, ITPR2, KIF13B, LOC100300091, LONP2, LYN, LYVE1, MAP2K1, MAP2K3, MAP3K13, ME1, ME3, MET, MGC151921, MYH10, MYO1H, NLRP12, NLRP3, NOS2, NOS3, NUAK2, OAS2, OPLAH, P4HA3, PADI4, PAK4, PDE5A, PDGFRA, PDGFRB, PLA2G15, PLOD2, PLOD3,…
GO:0097367	carbohydrate derivative binding	GO_MolecularFunction-EBI-UniProt-GOA_19.01.2019_00h00	0.000318431	0.00155469	4.13043	76	[ABCA1, ABCA10, ABCA6, ABL1, ADAMTS15, ADCY7, AK6, ANXA6, BTK, CCT5, CDC42BPG, COMP, CRISPLD2, CSNK1D, CYR61, DCK, DNAH11, EHD4, ENG, EPHA7, GFPT2, GIMAP7, GNAI2, HAPLN3, HCK, HK2, HK3, KIF13B, LONP2, LYN, LYVE1, MAP2K1, MAP2K3, MAP3K13, MET, MYH10, MYO1H, NID1, NLRP12, NLRP3, NOS2, NOS3, NUAK2, OAS2, OPLAH, PAK4, PDE5A, PDGFRA, PDGFRB, PGLYRP3, PTPRC, RAB20, RAB31, RAB38, RAB4A, RAB8B, RASEF, RB…
GO:0016772	transferase activity, transferring phosphorus-containing groups	GO_MolecularFunction-EBI-UniProt-GOA_19.01.2019_00h00	0.002397	0.0074297	4.5292	38	[ABL1, AK6, BTK, CDC42BPG, CDK5R1, CDKN3, CSNK1D, DCK, EPHA7, GALT, HCK, HK2, HK3, LOC574091, LYN, MAP2K1, MAP2K3, MAP3K13, MET, NADK, NUAK2, OAS2, PAK4, PDGFRA, PDGFRB, PHKA2, RBKS, RIPK3, ROR2, SLA, STK10, STK38, STK39, SYK, TEC, TYROBP, UCK2, ZAP70]
GO:0043168	anion binding	GO_MolecularFunction-EBI-UniProt-GOA_19.01.2019_00h00	5.60165e-05	0.000435879	4.11612	95	[ABCA1, ABCA10, ABCA6, ABL1, ADAMTS15, ADAP1, ADCY7, AK6, ALOX5AP, ANXA6, BTK, CCT5, CDC42BPG, COMP, CRISPLD2, CSNK1D, CYR61, DCK, DNAH11, EHD4, EPHA7, GIMAP7, GNAI2, HAPLN3, HCK, HK2, HK3, ITPR2, KIF13B, LONP2, LYN, LYVE1, MAP2K1, MAP2K3, MAP3K13, MET, MYH10, MYO1H, NLRP12, NLRP3, NOS2, NOS3, NUAK2, OAS2, OPLAH, P4HA3, PADI4, PAK4, PDE5A, PDGFRA, PDGFRB, PITPNA, PLA2G15, PLEKHA2, PLOD2, PLOD3, P…
GO:0004672	protein kinase activity	GO_MolecularFunction-EBI-UniProt-GOA_19.01.2019_00h00	0.0120641	0.0252434	4.54545	25	[ABL1, BTK, CDC42BPG, CSNK1D, EPHA7, HCK, LYN, MAP2K1, MAP2K3, MAP3K13, MET, NUAK2, PAK4, PDGFRA, PDGFRB, PHKA2, RIPK3, ROR2, SLA, STK10, STK38, STK39, SYK, TEC, ZAP70]
GO:0016301	kinase activity	GO_MolecularFunction-EBI-UniProt-GOA_19.01.2019_00h00	0.000412386	0.00188989	5.08475	36	[ABL1, AK6, BTK, CDC42BPG, CDK5R1, CDKN3, CSNK1D, DCK, EPHA7, HCK, HK2, HK3, LOC574091, LYN, MAP2K1, MAP2K3, MAP3K13, MET, NADK, NUAK2, PAK4, PDGFRA, PDGFRB, PHKA2, RBKS, RIPK3, ROR2, SLA, STK10, STK38, STK39, SYK, TEC, TYROBP, UCK2, ZAP70]
GO:0016773	phosphotransferase activity, alcohol group as acceptor	GO_MolecularFunction-EBI-UniProt-GOA_19.01.2019_00h00	0.00813703	0.0191746	4.50311	29	[ABL1, BTK, CDC42BPG, CSNK1D, EPHA7, HCK, HK2, HK3, LYN, MAP2K1, MAP2K3, MAP3K13, MET, NADK, NUAK2, PAK4, PDGFRA, PDGFRB, PHKA2, RBKS, RIPK3, ROR2, SLA, STK10, STK38, STK39, SYK, TEC, ZAP70]
GO:0016310	phosphorylation	GO_BiologicalProcess-EBI-UniProt-GOA_19.01.2019_00h00	0.00058451	0.00250936	4.13917	69	[ABL1, AK6, BST1, BTK, CASP3, CDC42BPG, CDC42EP5, CDK5R1, CDKN3, CSNK1D, DAB2, DCK, ENG, ENTPD5, EPHA7, F2RL1, GDF11, GHR, HCK, HK2, HK3, IL6R, IMPA2, ITGA5, ITGB3, LOC574091, LYN, MAP2K1, MAP2K3, MAP3K13, MET, NADK, NCKAP1L, NLRP12, NUAK2, PAK4, PDE5A, PDGFA, PDGFD, PDGFRA, PDGFRB, PGAM1, PHKA2, PID1, PLAUR, PTPRC, RABGEF1, RASGRP1, RBKS, RIPK3, ROR2, SLA, SLC11A1, SLC27A1, SMAD6, STK10, STK38, …
GO:0004715	non-membrane spanning protein tyrosine kinase activity	GO_MolecularFunction-EBI-UniProt-GOA_19.01.2019_00h00	1.00725e-05	0.000121358	20.5128	8	[ABL1, BTK, HCK, LYN, SLA, SYK, TEC, ZAP70]
GO:0051235	maintenance of location	GO_BiologicalProcess-EBI-UniProt-GOA_19.01.2019_00h00	5.78864e-05	0.000441236	8.07175	18	[ANXA6, CLMN, CYBA, DGAT2, HK2, ITPR2, LYN, MCOLN2, NOL3, PLCH2, PPARD, PTPRC, SUN2, TNF, TPCN2, TXN, UBASH3B, VPS13C]
GO:0032507	maintenance of protein location in cell	GO_BiologicalProcess-EBI-UniProt-GOA_19.01.2019_00h00	0.0147525	0.0286982	9.61539	5	[CLMN, HK2, SUN2, TXN, VPS13C]
GO:0055082	cellular chemical homeostasis	GO_BiologicalProcess-EBI-UniProt-GOA_19.01.2019_00h00	0.0218889	0.0387464	4.45344	22	[ANXA6, ATP1B3, CACNA1A, CYBA, DGAT2, DMXL2, F2RL1, GRIN2D, HK2, HK3, ITPR2, LYN, MCOLN2, NOL3, PLCH2, PTPRC, RAB20, RAB38, SLC11A1, SLC39A14, TPCN2, UBASH3B]
GO:0050801	ion homeostasis	GO_BiologicalProcess-EBI-UniProt-GOA_19.01.2019_00h00	0.00912878	0.0210469	4.65549	25	[ABCA1, ANXA6, ATP1B3, BDH2, CACNA1A, CYBA, DGAT2, DMXL2, F2RL1, GJA1, GRIN2D, ITPR2, LYN, MCOLN2, NOL3, PLCH2, PTPRC, RAB20, RAB38, RCN3, SFXN3, SLC11A1, SLC39A14, TPCN2, UBASH3B]
GO:0030003	cellular cation homeostasis	GO_BiologicalProcess-EBI-UniProt-GOA_19.01.2019_00h00	0.0287237	0.0475756	4.50237	19	[ANXA6, ATP1B3, CACNA1A, CYBA, DMXL2, F2RL1, GRIN2D, ITPR2, LYN, MCOLN2, NOL3, PLCH2, PTPRC, RAB20, RAB38, SLC11A1, SLC39A14, TPCN2, UBASH3B]
GO:0051283	negative regulation of sequestering of calcium ion	GO_BiologicalProcess-EBI-UniProt-GOA_19.01.2019_00h00	8.41326e-05	0.000581917	12.3457	10	[ANXA6, CYBA, ITPR2, LYN, MCOLN2, NOL3, PLCH2, PTPRC, TPCN2, UBASH3B]
GO:0097553	calcium ion transmembrane import into cytosol	GO_BiologicalProcess-EBI-UniProt-GOA_19.01.2019_00h00	0.000154369	0.000900888	11.4943	10	[CYBA, GRIN2D, ITPR2, LYN, MCOLN2, NOL3, PLCH2, PTPRC, TPCN2, UBASH3B]
GO:0048856	anatomical structure development	GO_BiologicalProcess-EBI-UniProt-GOA_19.01.2019_00h00	5.26186e-08	2.62041e-06	4.19263	148	[ABHD2, ADAM19, ADAMTS2, ADAMTS9, ALDH5A1, ANGPT2, ANXA6, ARHGAP15, BASP1, BDH2, BDNF, BMP1, BNC2, BTK, CACNA1A, CAP2, CASP3, CCBE1, CCDC151, CD3E, CD8A, CDC42EP5, CDK5R1, CNN2, COL1A1, COL7A1, COMP, CRISPLD2, CRX, CSF3R, DAB2, DGAT2, DNAH11, DND1, E2F2, ECE2, ELK3, ENG, EPHA7, EYA2, F2RL1, FCER1G, FERMT3, FLI1, FLRT2, FMNL1, FOSL2, FOXF1, FUZ, GALT, GDF11, GFRA1, GFRA2, GJA1, GRHL2, HAPLN3, HK2,…
GO:0048869	cellular developmental process	GO_BiologicalProcess-EBI-UniProt-GOA_19.01.2019_00h00	4.96561e-07	1.61274e-05	4.35613	114	[ABHD2, ABL1, ADAMTS9, ANGPT2, ANXA6, ARHGAP15, BASP1, BDH2, BDNF, BTK, CACNA1A, CAP2, CASP3, CD3E, CD8A, CDC42EP5, CDK5R1, COL1A1, COL7A1, COMP, CRX, CSF3R, DAB2, DND1, ECE2, ELF5, ELK3, ENG, EPHA7, F2RL1, FCER1G, FERMT3, FLI1, FLRT2, FMNL1, FOSL2, FOXF1, GALT, GDF11, GJA1, GRHL2, HCK, HLF, IKZF3, IL18R1, IRF2BP2, IRF8, ITGA5, ITGB3, ITGB7, KIF13B, KRT19, KRT8, LOXL2, LYN, MANF, MAP1A, MAP2K1, M…
GO:0009653	anatomical structure morphogenesis	GO_BiologicalProcess-EBI-UniProt-GOA_19.01.2019_00h00	0.000219751	0.00114793	4.25404	71	[ADAMTS9, ANGPT2, ANXA6, ARHGAP15, BDNF, CACNA1A, CAP2, CCBE1, CDC42EP5, CDK5R1, COL1A1, COL7A1, COMP, CRISPLD2, DAB2, DNAH11, E2F2, ELK3, ENG, EPHA7, FERMT3, FLI1, FLRT2, FMNL1, FOXF1, FUZ, GALT, GDF11, GJA1, GRHL2, HK2, ITGA5, ITGB3, ITGB7, KIF13B, KRT19, LOXL2, LRIG3, MAP1A, MAP2K1, MET, MMP2, MSN, MYH10, NCKAP1L, NGFR, NR4A3, NTNG2, PARVB, PARVG, PID1, PLEKHO1, PLOD3, PLXNA2, PMP22, PREX1, RA…
GO:0030154	cell differentiation	GO_BiologicalProcess-EBI-UniProt-GOA_19.01.2019_00h00	4.53863e-06	7.37035e-05	4.25963	105	[ABHD2, ABL1, ADAMTS9, ANGPT2, ANXA6, BASP1, BDH2, BDNF, BTK, CACNA1A, CASP3, CD3E, CD8A, CDK5R1, COL1A1, COL7A1, COMP, CRX, CSF3R, DAB2, DND1, ECE2, ELF5, ELK3, ENG, EPHA7, F2RL1, FCER1G, FERMT3, FLI1, FLRT2, FOSL2, FOXF1, GALT, GDF11, GJA1, GRHL2, HCK, HLF, IKZF3, IL18R1, IRF2BP2, IRF8, ITGA5, ITGB3, ITGB7, KIF13B, KRT19, KRT8, LOXL2, LYN, MANF, MAP1A, MAP2K1, MARVELD2, MET, MMP2, MSN, NCKAP1L,…
GO:0048731	system development	GO_BiologicalProcess-EBI-UniProt-GOA_19.01.2019_00h00	1.43716e-05	0.000155588	4.04604	116	[ADAM19, ADAMTS2, ADAMTS9, ALDH5A1, ANGPT2, ANXA6, BASP1, BDNF, BMP1, BNC2, BTK, CACNA1A, CASP3, CCBE1, CD3E, CD8A, CDK5R1, CNN2, COL1A1, COL7A1, COMP, CRX, CSF3R, DAB2, DGAT2, DNAH11, E2F2, ECE2, ELK3, ENG, EPHA7, F2RL1, FCER1G, FLI1, FLRT2, FOSL2, FOXF1, FUZ, GALT, GDF11, GFRA1, GFRA2, GJA1, GRHL2, HAPLN3, HK2, HLF, IKZF3, IL18R1, IL1RAP, IL2RA, IL6R, IRF2BP2, IRF8, ITGA5, KIF13B, KRT19, KRT8, …
GO:0002520	immune system development	GO_BiologicalProcess-EBI-UniProt-GOA_19.01.2019_00h00	3.96869e-05	0.000325781	5.87219	34	[BTK, CASP3, CD3E, CD8A, CNN2, CSF3R, F2RL1, FCER1G, FLI1, IKZF3, IL18R1, IL2RA, IRF2BP2, IRF8, LYN, MAP2K1, NCKAP1L, NLRP3, PATZ1, PDGFRA, PDGFRB, PGLYRP3, PGM3, PLD4, PREX1, PTPRC, RASGRP1, RIPK3, SLAMF6, SYK, TNF, TNFSF8, UBASH3B, ZAP70]
GO:0048513	animal organ development	GO_BiologicalProcess-EBI-UniProt-GOA_19.01.2019_00h00	9.22948e-06	0.000116855	4.38856	89	[ADAM19, ADAMTS2, ADAMTS9, ANXA6, BASP1, BMP1, BNC2, BTK, CACNA1A, CASP3, CCBE1, CD3E, CD8A, CDK5R1, CNN2, COL1A1, COL7A1, COMP, CSF3R, DAB2, DGAT2, DNAH11, ECE2, ENG, EPHA7, F2RL1, FCER1G, FLI1, FLRT2, FOSL2, FOXF1, GDF11, GJA1, GRHL2, HLF, IKZF3, IL18R1, IL6R, IRF2BP2, IRF8, KRT19, KRT8, LOXL2, LRIG3, LYN, MAP2K1, MET, MMP2, MSN, NCKAP1L, NID1, NLRP3, NR4A3, OAS2, PATZ1, PDGFA, PDGFRA, PDGFRB, …
GO:0002705	positive regulation of leukocyte mediated immunity	GO_BiologicalProcess-EBI-UniProt-GOA_19.01.2019_00h00	0.000109163	0.00068525	11	11	[CADM1, F2RL1, FAM49B, FCER1G, IL18R1, NLRP3, PTPRC, RASGRP1, SLAMF6, SYK, TNF]
GO:0038061	NIK/NF-kappaB signaling	GO_BiologicalProcess-EBI-UniProt-GOA_19.01.2019_00h00	0.0162411	0.0310284	8.21918	6	[IL18R1, NLRP12, NLRP3, NOL3, RIPK3, TNF]
GO:0050701	interleukin-1 secretion	GO_BiologicalProcess-EBI-UniProt-GOA_19.01.2019_00h00	0.00155482	0.00532775	16.129	5	[ABCA1, F2RL1, IL1R2, NLRP12, NLRP3]
GO:0050715	positive regulation of cytokine secretion	GO_BiologicalProcess-EBI-UniProt-GOA_19.01.2019_00h00	0.00423561	0.0118502	9.58904	7	[CADM1, F2RL1, IL1RAP, NLRP3, RASGRP1, SCAMP5, TNF]
GO:0002274	myeloid leukocyte activation	GO_BiologicalProcess-EBI-UniProt-GOA_19.01.2019_00h00	0.000483877	0.00212621	10	10	[F2RL1, FCER1G, FOXF1, LYN, NR4A3, RABGEF1, RASGRP1, SLC11A1, SYK, TNF]
GO:0002366	leukocyte activation involved in immune response	GO_BiologicalProcess-EBI-UniProt-GOA_19.01.2019_00h00	0.000121466	0.000731732	8.57143	15	[F2RL1, FCER1G, FOXF1, IL18R1, LCP1, LYN, NLRP3, NR4A3, PGLYRP3, PTPRC, RABGEF1, RASGRP1, SLAMF6, SLC11A1, SYK]
GO:0051656	establishment of organelle localization	GO_BiologicalProcess-EBI-UniProt-GOA_19.01.2019_00h00	0.0186999	0.0346621	5.10204	15	[CACNA1A, CLMN, FCER1G, FOXF1, LYN, NR4A3, RABGEF1, RASGRP1, STX11, STX19, STX2, SUN2, SYK, SYT1, SYT11]
GO:0002444	myeloid leukocyte mediated immunity	GO_BiologicalProcess-EBI-UniProt-GOA_19.01.2019_00h00	0.000103005	0.000663319	15.0943	8	[F2RL1, FCER1G, FOXF1, LYN, NR4A3, RABGEF1, RASGRP1, SYK]
GO:0002275	myeloid cell activation involved in immune response	GO_BiologicalProcess-EBI-UniProt-GOA_19.01.2019_00h00	2.56691e-05	0.000236726	18.1818	8	[F2RL1, FCER1G, FOXF1, LYN, NR4A3, RABGEF1, RASGRP1, SYK]
GO:0017157	regulation of exocytosis	GO_BiologicalProcess-EBI-UniProt-GOA_19.01.2019_00h00	0.000268641	0.00134681	9.30233	12	[CACNA1A, F2RL1, FCER1G, FOXF1, LYN, RAB8B, RABGEF1, SCAMP5, SDC4, SYK, SYT1, SYT11]
GO:0045055	regulated exocytosis	GO_BiologicalProcess-EBI-UniProt-GOA_19.01.2019_00h00	2.39254e-05	0.000226231	9.86842	15	[CACNA1A, F2RL1, FCER1G, FOXF1, LYN, NR4A3, RABGEF1, RASGRP1, SCAMP5, STX11, STX19, STX2, SYK, SYT1, SYT11]
GO:0043299	leukocyte degranulation	GO_BiologicalProcess-EBI-UniProt-GOA_19.01.2019_00h00	4.25079e-06	7.05631e-05	22.8571	8	[F2RL1, FCER1G, FOXF1, LYN, NR4A3, RABGEF1, RASGRP1, SYK]
GO:1903305	regulation of regulated secretory pathway	GO_BiologicalProcess-EBI-UniProt-GOA_19.01.2019_00h00	0.000268617	0.00135579	10.7527	10	[CACNA1A, F2RL1, FCER1G, FOXF1, LYN, RABGEF1, SCAMP5, SYK, SYT1, SYT11]
GO:0002449	lymphocyte mediated immunity	GO_BiologicalProcess-EBI-UniProt-GOA_19.01.2019_00h00	0.000847881	0.00336897	7.78443	13	[BTK, CADM1, CD8A, FAM49B, FCER1G, IL18R1, NLRP3, PTPRC, RASGRP1, RIPK3, SLAMF6, SLC11A1, TNF]
GO:0002460	adaptive immune response based on somatic recombination of immune receptors built from immunoglobulin superfamily domains	GO_BiologicalProcess-EBI-UniProt-GOA_19.01.2019_00h00	0.00456698	0.0125887	6.70391	12	[BTK, CD8A, FAM49B, FCER1G, IL18R1, IL6R, NLRP3, PTPRC, RIPK3, SLAMF6, SLC11A1, TNF]
GO:0002369	T cell cytokine production	GO_BiologicalProcess-EBI-UniProt-GOA_19.01.2019_00h00	0.0283881	0.0472292	12.5	3	[IL18R1, NLRP3, SLC11A1]
GO:0002456	T cell mediated immunity	GO_BiologicalProcess-EBI-UniProt-GOA_19.01.2019_00h00	0.00747781	0.0179612	8.64198	7	[CD8A, FAM49B, IL18R1, NLRP3, PTPRC, RIPK3, SLC11A1]
GO:0050711	negative regulation of interleukin-1 secretion	GO_BiologicalProcess-EBI-UniProt-GOA_19.01.2019_00h00	0.000697829	0.00289599	42.8571	3	[IL1R2, NLRP12, NLRP3]
GO:0098657	import into cell	GO_BiologicalProcess-EBI-UniProt-GOA_19.01.2019_00h00	2.3305e-06	4.46381e-05	6.71937	34	[ABCA1, ANXA6, ATP1B3, CD163, CNN2, CYBA, DAB2, F2RL1, FCER1G, GHR, IL10RA, IRF8, ITGB3, LOXL2, MARCH3, MET, MGC139164, MGC157082, NCKAP1L, PLD4, PTPRC, PTX3, RAB20, RAB4A, RABGEF1, RHOQ, SCAMP5, SIRPA, SLC11A1, SLC39A14, STON2, SYT1, TNF, XKR8]
GO:0006897	endocytosis	GO_BiologicalProcess-EBI-UniProt-GOA_19.01.2019_00h00	1.95172e-06	4.04982e-05	7.26392	30	[ABCA1, ANXA6, CD163, CNN2, CYBA, DAB2, F2RL1, FCER1G, GHR, IL10RA, IRF8, ITGB3, LOXL2, MARCH3, MET, NCKAP1L, PLD4, PTPRC, PTX3, RAB20, RAB4A, RABGEF1, RHOQ, SCAMP5, SIRPA, SLC11A1, STON2, SYT1, TNF, XKR8]
GO:0030100	regulation of endocytosis	GO_BiologicalProcess-EBI-UniProt-GOA_19.01.2019_00h00	3.33488e-06	5.93132e-05	10.9589	16	[CNN2, CYBA, DAB2, F2RL1, FCER1G, NCKAP1L, PTPRC, PTX3, RAB20, RAB4A, RABGEF1, SCAMP5, SIRPA, SLC11A1, STON2, TNF]
GO:0001505	regulation of neurotransmitter levels	GO_BiologicalProcess-EBI-UniProt-GOA_19.01.2019_00h00	0.0069834	0.0171036	6.34921	12	[ALDH5A1, CACNA1A, GLYAT, NOS2, NOS3, PTX3, STX11, STX19, STX2, SYT1, SYT11, TNF]
GO:0051640	organelle localization	GO_BiologicalProcess-EBI-UniProt-GOA_19.01.2019_00h00	0.024747	0.0423991	4.65116	18	[CACNA1A, CLMN, FCER1G, FOXF1, LYN, NIN, NR4A3, PLXNA2, RAB8B, RABGEF1, RASGRP1, STX11, STX19, STX2, SUN2, SYK, SYT1, SYT11]
GO:0061024	membrane organization	GO_BiologicalProcess-EBI-UniProt-GOA_19.01.2019_00h00	0.00532543	0.0141067	5.08083	22	[ABCA1, ANXA6, EYA2, F2RL1, FCER1G, HK2, NCKAP1L, NOL3, PLSCR4, PTPRC, RAB20, RAB8B, RILPL1, SEC23A, STX11, STX19, STX2, SUN2, SYT1, TOR1B, TRAM2, XKR8]
GO:0042133	neurotransmitter metabolic process	GO_BiologicalProcess-EBI-UniProt-GOA_19.01.2019_00h00	0.0162411	0.0310284	8.21918	6	[ALDH5A1, GLYAT, NOS2, NOS3, PTX3, TNF]
GO:0006887	exocytosis	GO_BiologicalProcess-EBI-UniProt-GOA_19.01.2019_00h00	0.000101793	0.000661213	7.72532	18	[CACNA1A, EXOC3L2, F2RL1, FCER1G, FOXF1, LYN, NR4A3, RAB8B, RABGEF1, RASGRP1, SCAMP5, SDC4, STX11, STX19, STX2, SYK, SYT1, SYT11]
GO:0140029	exocytic process	GO_BiologicalProcess-EBI-UniProt-GOA_19.01.2019_00h00	0.00594713	0.0150085	10.1695	6	[FCER1G, RAB8B, STX11, STX19, STX2, SYT1]
GO:0006906	vesicle fusion	GO_BiologicalProcess-EBI-UniProt-GOA_19.01.2019_00h00	0.0117221	0.0248057	8.82353	6	[RAB20, RAB8B, STX11, STX19, STX2, SYT1]
GO:0030133	transport vesicle	GO_CellularComponent-EBI-UniProt-GOA_19.01.2019_00h00	0.0225266	0.0395938	5.40541	12	[BDNF, CRISPLD2, ECE2, ITPR2, RAB8B, SCAMP5, SEC23A, STX11, STX19, STX2, SYT1, SYT11]
GO:0030667	secretory granule membrane	GO_CellularComponent-EBI-UniProt-GOA_19.01.2019_00h00	0.0106386	0.0233737	10.4167	5	[ANXA6, ITPR2, SELP, SLC11A1, SYT1]
GO:0099503	secretory vesicle	GO_CellularComponent-EBI-UniProt-GOA_19.01.2019_00h00	0.0102204	0.0227221	5.35117	16	[ABHD2, ANXA6, BDNF, F5, ITPR2, RAB8B, RNPEP, SCAMP5, SELP, SLC11A1, STX11, STX19, STX2, SYT1, SYT11, TCP1]
GO:0031629	synaptic vesicle fusion to presynaptic active zone membrane	GO_BiologicalProcess-EBI-UniProt-GOA_19.01.2019_00h00	0.00107279	0.00406788	23.5294	4	[STX11, STX19, STX2, SYT1]
GO:0051047	positive regulation of secretion	GO_BiologicalProcess-EBI-UniProt-GOA_19.01.2019_00h00	0.0239502	0.041414	5.35714	12	[CADM1, CYBA, F2RL1, FCER1G, IL1RAP, NLRP3, RASGRP1, SCAMP5, SDC4, SYK, SYT1, TNF]
GO:0042119	neutrophil activation	GO_BiologicalProcess-EBI-UniProt-GOA_19.01.2019_00h00	0.0110119	0.0238432	17.6471	3	[F2RL1, FCER1G, SYK]
GO:0002888	positive regulation of myeloid leukocyte mediated immunity	GO_BiologicalProcess-EBI-UniProt-GOA_19.01.2019_00h00	0.00925796	0.0210203	18.75	3	[F2RL1, FCER1G, SYK]
GO:0043302	positive regulation of leukocyte degranulation	GO_BiologicalProcess-EBI-UniProt-GOA_19.01.2019_00h00	0.00160616	0.00545366	33.3333	3	[F2RL1, FCER1G, SYK]
GO:0050839	cell adhesion molecule binding	GO_MolecularFunction-EBI-UniProt-GOA_19.01.2019_00h00	0.000876832	0.00342929	8.16327	12	[CDK5R1, COMP, CYR61, FERMT3, ITGA5, ITGB3, ITGB7, LCP1, MSN, PKP2, PKP3, SELL]
GO:0005178	integrin binding	GO_MolecularFunction-EBI-UniProt-GOA_19.01.2019_00h00	0.00456836	0.0125462	9.45946	7	[COMP, CYR61, FERMT3, ITGA5, ITGB3, ITGB7, LCP1]
GO:0000904	cell morphogenesis involved in differentiation	GO_BiologicalProcess-EBI-UniProt-GOA_19.01.2019_00h00	0.00537065	0.0141263	5	23	[BDNF, CACNA1A, CDK5R1, COL7A1, EPHA7, FERMT3, FLRT2, GRHL2, ITGB3, ITGB7, KIF13B, MAP1A, MAP2K1, MET, NR4A3, NTNG2, PARVB, PARVG, PLOD3, PLXNA2, PREX1, RILPL1, SEMA6B]
GO:0044281	small molecule metabolic process	GO_BiologicalProcess-EBI-UniProt-GOA_19.01.2019_00h00	4.25883e-05	0.000338441	4.65288	63	[ABCA1, ABHD2, ACAT2, ACOT9, ADCY7, AK6, ALDH5A1, ALOX5AP, AMPD3, APOBEC3Z1, BCKDHB, BDH2, CACNA1A, CDA, CLYBL, CYP2S1, DCK, DGAT2, DSE, ELOVL1, ENTPD5, FBP2, GALT, GFPT2, GLYAT, HK2, HK3, IMPA2, ITIH2, LDHA, LOC511936, LOC530929, LONP2, ME1, ME3, NADK, NOS2, NOS3, NPL, NR4A3, NUDT7, P4HA3, PADI4, PDE5A, PGAM1, PGM3, PID1, PLA2G15, PLCH2, PLOD2, PLOD3, PPARD, RBKS, RHOQ, SDS, SFXN3, SLC27A1, TNF,…
GO:0005975	carbohydrate metabolic process	GO_BiologicalProcess-EBI-UniProt-GOA_19.01.2019_00h00	0.00200666	0.00646111	5.51378	22	[ALDH5A1, AOAH, DGAT2, ENTPD5, FBP2, GALT, GPD1L, HK2, HK3, IMPA2, LDHA, MLXIP, NPL, PGAM1, PGM3, PHKA2, PYGL, RBKS, SDS, SLC3A2, ST8SIA4, TNF]
GO:0006082	organic acid metabolic process	GO_BiologicalProcess-EBI-UniProt-GOA_19.01.2019_00h00	0.000576228	0.00248811	4.99307	36	[ABHD2, ACAT2, ALDH5A1, ALOX5AP, BCKDHB, BDH2, CACNA1A, CYP2S1, DSE, ELOVL1, ENTPD5, GFPT2, GLYAT, HK2, HK3, ITIH2, LDHA, LOC511936, LOC530929, LONP2, ME1, ME3, NOS2, NOS3, NPL, NR4A3, P4HA3, PADI4, PGAM1, PLA2G15, PLOD2, PLOD3, PPARD, SDS, SLC27A1, VNN2]
GO:1901135	carbohydrate derivative metabolic process	GO_BiologicalProcess-EBI-UniProt-GOA_19.01.2019_00h00	5.70945e-05	0.000439687	5.2439	43	[ACOT9, ADCY7, ALDH5A1, AMPD3, AOAH, APOBEC3Z1, BACE2, CDA, CSGALNACT2, DGAT2, DSE, ELOVL1, ENTPD5, FBP2, FUT4, GALNT8, GALT, GFPT2, GPD1L, HK2, HK3, HS3ST2, ITIH2, KDELC1, LYVE1, NPL, NUDT7, PDE5A, PGAM1, PGLYRP3, PGM3, PID1, PLOD3, PTX3, RHOQ, RPN2, ST3GAL3, ST8SIA4, TNIP1, UCK2, UGCG, UGGT2, UPP1]
GO:0019637	organophosphate metabolic process	GO_BiologicalProcess-EBI-UniProt-GOA_19.01.2019_00h00	0.0136039	0.0272444	4.22164	32	[ACOT9, ADCY7, AK6, ALDH5A1, AMPD3, DCK, DGAT2, ELOVL1, ENTPD5, FBP2, GFPT2, GPD1L, HK2, HK3, IMPA2, INPP5D, LYN, ME1, NADK, NOS2, NOS3, NUDT7, PDE5A, PDGFA, PGAM1, PID1, PLA2G15, PLCH2, RHOQ, SLC27A1, UCK2, UPP1]
GO:0044262	cellular carbohydrate metabolic process	GO_BiologicalProcess-EBI-UniProt-GOA_19.01.2019_00h00	0.0236596	0.0411016	5.55556	11	[AOAH, DGAT2, FBP2, GALT, HK2, HK3, IMPA2, PGAM1, PHKA2, PYGL, RBKS]
GO:0016052	carbohydrate catabolic process	GO_BiologicalProcess-EBI-UniProt-GOA_19.01.2019_00h00	0.014534	0.028347	7.6087	7	[ENTPD5, GALT, HK2, HK3, PGAM1, PYGL, RBKS]
GO:0043436	oxoacid metabolic process	GO_BiologicalProcess-EBI-UniProt-GOA_19.01.2019_00h00	0.00139706	0.004946	4.83642	34	[ABHD2, ACAT2, ALDH5A1, ALOX5AP, BCKDHB, BDH2, CACNA1A, CYP2S1, DSE, ELOVL1, ENTPD5, GFPT2, GLYAT, HK2, HK3, ITIH2, LDHA, LONP2, ME1, ME3, NOS2, NOS3, NPL, NR4A3, P4HA3, PADI4, PGAM1, PLA2G15, PLOD2, PLOD3, PPARD, SDS, SLC27A1, VNN2]
GO:0055086	nucleobase-containing small molecule metabolic process	GO_BiologicalProcess-EBI-UniProt-GOA_19.01.2019_00h00	0.00106316	0.00405196	5.33597	27	[ACOT9, ADCY7, AK6, AMPD3, APOBEC3Z1, CDA, DCK, DGAT2, ELOVL1, ENTPD5, GALT, GFPT2, HK2, HK3, ME1, NADK, NOS2, NOS3, NUDT7, PDE5A, PGAM1, PGM3, PID1, RHOQ, UCK2, UGGT2, UPP1]
GO:1901137	carbohydrate derivative biosynthetic process	GO_BiologicalProcess-EBI-UniProt-GOA_19.01.2019_00h00	0.000865593	0.00340315	5.41082	27	[ADCY7, AMPD3, BACE2, CSGALNACT2, DSE, ELOVL1, ENTPD5, FUT4, GALNT8, GALT, GFPT2, HK2, HK3, HS3ST2, KDELC1, PGAM1, PGM3, PID1, PLOD3, RPN2, ST3GAL3, ST8SIA4, TNIP1, UCK2, UGCG, UGGT2, UPP1]
GO:0009100	glycoprotein metabolic process	GO_BiologicalProcess-EBI-UniProt-GOA_19.01.2019_00h00	0.00263803	0.00804329	6.00707	17	[BACE2, CSGALNACT2, DSE, ENTPD5, FUT4, GALNT8, GALT, GFPT2, HS3ST2, KDELC1, PLOD3, PTX3, RPN2, ST3GAL3, ST8SIA4, TNIP1, UGGT2]
GO:0046434	organophosphate catabolic process	GO_BiologicalProcess-EBI-UniProt-GOA_19.01.2019_00h00	0.00569969	0.0145811	7.19424	10	[ENTPD5, GPD1L, HK2, HK3, IMPA2, NUDT7, PDE5A, PGAM1, PLA2G15, UPP1]
GO:0051156	glucose 6-phosphate metabolic process	GO_BiologicalProcess-EBI-UniProt-GOA_19.01.2019_00h00	0.0129445	0.0265647	16.6667	3	[HK2, HK3, PGAM1]
GO:0019200	carbohydrate kinase activity	GO_MolecularFunction-EBI-UniProt-GOA_19.01.2019_00h00	0.0150582	0.0292168	15.7895	3	[HK2, HK3, RBKS]
GO:0046835	carbohydrate phosphorylation	GO_BiologicalProcess-EBI-UniProt-GOA_19.01.2019_00h00	0.0173549	0.0328205	15	3	[HK2, HK3, RBKS]
GO:0006486	protein glycosylation	GO_BiologicalProcess-EBI-UniProt-GOA_19.01.2019_00h00	0.014016	0.0276983	6.01093	11	[ENTPD5, FUT4, GALNT8, GALT, GFPT2, KDELC1, PLOD3, RPN2, ST3GAL3, ST8SIA4, UGGT2]
GO:0009132	nucleoside diphosphate metabolic process	GO_BiologicalProcess-EBI-UniProt-GOA_19.01.2019_00h00	0.0244022	0.042001	7.5	6	[AMPD3, ENTPD5, HK2, HK3, NUDT7, PGAM1]
GO:0044282	small molecule catabolic process	GO_BiologicalProcess-EBI-UniProt-GOA_19.01.2019_00h00	0.00225989	0.00709302	6.27451	16	[ABHD2, ACAT2, ALDH5A1, APOBEC3Z1, BCKDHB, BDH2, CDA, GALT, IMPA2, LONP2, NOS2, NOS3, NPL, PADI4, RBKS, SDS]
GO:0009063	cellular amino acid catabolic process	GO_BiologicalProcess-EBI-UniProt-GOA_19.01.2019_00h00	0.0286118	0.0474956	7.22892	6	[ALDH5A1, BCKDHB, NOS2, NOS3, PADI4, SDS]
GO:0046395	carboxylic acid catabolic process	GO_BiologicalProcess-EBI-UniProt-GOA_19.01.2019_00h00	0.00987577	0.0220874	6.32184	11	[ABHD2, ACAT2, ALDH5A1, BCKDHB, BDH2, LONP2, NOS2, NOS3, NPL, PADI4, SDS]
GO:0009064	glutamine family amino acid metabolic process	GO_BiologicalProcess-EBI-UniProt-GOA_19.01.2019_00h00	0.0275876	0.0463099	8.19672	5	[ALDH5A1, GFPT2, NOS2, NOS3, PADI4]
GO:0009611	response to wounding	GO_BiologicalProcess-EBI-UniProt-GOA_19.01.2019_00h00	3.12471e-10	4.66832e-08	11.0266	29	[ABHD2, ANXA6, CASP3, CNN2, COMP, ELK3, F13A1, F2RL1, F5, FCER1G, FERMT3, FOXF1, GALT, GJA1, ITGA5, ITGB3, LYN, MAP2K1, NOL3, NOS3, PDGFA, PPL, SDC4, SELP, SLC11A1, SYK, TEC, THBD, UBASH3B]
GO:0050878	regulation of body fluid levels	GO_BiologicalProcess-EBI-UniProt-GOA_19.01.2019_00h00	1.90249e-06	4.06046e-05	9.52381	20	[COMP, CYBA, F13A1, F2RL1, F5, FCER1G, FERMT3, GJA1, ITGB3, LYN, MET, NOS3, OAS2, PDGFA, SELP, SYK, TEC, THBD, TNF, UBASH3B]
GO:1900046	regulation of hemostasis	GO_BiologicalProcess-EBI-UniProt-GOA_19.01.2019_00h00	1.4609e-06	3.41028e-05	19.2308	10	[COMP, F2RL1, FCER1G, LYN, PDGFA, SELP, SYK, TEC, THBD, UBASH3B]
GO:0007596	blood coagulation	GO_BiologicalProcess-EBI-UniProt-GOA_19.01.2019_00h00	4.63278e-07	1.57304e-05	13.5135	15	[COMP, F13A1, F2RL1, F5, FCER1G, FERMT3, ITGB3, LYN, NOS3, PDGFA, SELP, SYK, TEC, THBD, UBASH3B]
GO:0042060	wound healing	GO_BiologicalProcess-EBI-UniProt-GOA_19.01.2019_00h00	8.47333e-09	6.32958e-07	11.1628	24	[ANXA6, CNN2, COMP, ELK3, F13A1, F2RL1, F5, FCER1G, FERMT3, GALT, GJA1, ITGA5, ITGB3, LYN, NOS3, PDGFA, PPL, SDC4, SELP, SLC11A1, SYK, TEC, THBD, UBASH3B]
GO:1900047	negative regulation of hemostasis	GO_BiologicalProcess-EBI-UniProt-GOA_19.01.2019_00h00	0.010422	0.0229652	12.9032	4	[COMP, PDGFA, THBD, UBASH3B]
GO:1903034	regulation of response to wounding	GO_BiologicalProcess-EBI-UniProt-GOA_19.01.2019_00h00	0.000169889	0.000968754	11.3636	10	[F2RL1, FCER1G, LYN, MAP2K1, PDGFA, SELP, SYK, TEC, THBD, UBASH3B]
GO:0010543	regulation of platelet activation	GO_BiologicalProcess-EBI-UniProt-GOA_19.01.2019_00h00	2.91883e-06	5.31797e-05	29.1667	7	[FCER1G, LYN, PDGFA, SELP, SYK, TEC, UBASH3B]
GO:0002286	T cell activation involved in immune response	GO_BiologicalProcess-EBI-UniProt-GOA_19.01.2019_00h00	0.00907365	0.0209846	8.33333	7	[F2RL1, FCER1G, IL18R1, LCP1, NLRP3, SLAMF6, SLC11A1]
GO:0002252	immune effector process	GO_BiologicalProcess-EBI-UniProt-GOA_19.01.2019_00h00	0.00145065	0.00508748	5.37634	25	[BTK, CADM1, CD59, CD8A, F2RL1, FAM49B, FCER1G, FOXF1, IFIT3, IL18R1, LCP1, LYN, NLRP3, NR4A3, OAS2, PGLYRP3, PTPRC, PTX3, RABGEF1, RASGRP1, RIPK3, SLAMF6, SLC11A1, SYK, TNF]
GO:0006955	immune response	GO_BiologicalProcess-EBI-UniProt-GOA_19.01.2019_00h00	0.000211499	0.00111261	4.90524	44	[ADCY7, BTK, CADM1, CD247, CD3E, CD59, CD7, CD80, CD86, CD8A, CYBA, F2RL1, FAM49B, FCER1G, FOXF1, IL18R1, IL6R, IRF8, LAT2, LCP1, LYN, NCKAP1L, NLRP3, NOS2, NR4A3, OAS2, PGLYRP3, PIGR, PTPRC, PTX3, RAB20, RABGEF1, RASGRP1, RIPK3, SLAMF6, SLC11A1, SMAD6, SYK, TEC, TNF, TNFAIP8L2, TNFSF8, TNIP1, ZAP70]
GO:0045321	leukocyte activation	GO_BiologicalProcess-EBI-UniProt-GOA_19.01.2019_00h00	7.64484e-10	9.51783e-08	8.06142	42	[BST1, BTK, CASP3, CD3E, CD80, CD86, CD8A, F2RL1, FAM49B, FCER1G, FOXF1, GJA1, IKZF3, IL18R1, IL6R, IRF2BP2, LAT2, LCP1, LYN, MSN, NCKAP1L, NLRP3, NR4A3, PATZ1, PDE5A, PGLYRP3, PREX1, PTPRC, RABGEF1, RASGRP1, RIPK3, RIPOR2, SDC4, SIRPA, SKAP2, SLAMF6, SLC11A1, SYK, TNF, TNFAIP8L2, TNFSF8, ZAP70]
GO:0002443	leukocyte mediated immunity	GO_BiologicalProcess-EBI-UniProt-GOA_19.01.2019_00h00	1.01885e-05	0.000120807	8.83721	19	[BTK, CADM1, CD8A, F2RL1, FAM49B, FCER1G, FOXF1, IL18R1, LYN, NLRP3, NR4A3, PTPRC, RABGEF1, RASGRP1, RIPK3, SLAMF6, SLC11A1, SYK, TNF]
GO:0048584	positive regulation of response to stimulus	GO_BiologicalProcess-EBI-UniProt-GOA_19.01.2019_00h00	0.00247423	0.0076374	4.11369	55	[BTK, CADM1, CD247, CD59, COL1A1, CSNK1D, CYBA, DAB2, ENG, EYA2, F2RL1, FAM49B, FCER1G, GDF11, GHR, GJA1, IL10RA, IL18R1, IL6R, LAT2, LYN, MAP2K1, MAP2K3, MAP3K13, MAPRE2, MET, NCKAP1L, NLRP12, NLRP3, NR4A3, PDE5A, PDGFA, PDGFD, PDGFRA, PDGFRB, PGLYRP3, PLAUR, PTPRC, RABGEF1, RASGRP1, RIPK3, RIPOR2, ROR2, SELP, SH3BP2, SLA, SLAMF6, SLC11A1, SYK, TEC, TNF, TNFRSF19, TNIP1, VEGFC, ZAP70]
GO:0050776	regulation of immune response	GO_BiologicalProcess-EBI-UniProt-GOA_19.01.2019_00h00	2.88599e-05	0.000256647	6.32911	30	[ADCY7, BTK, CADM1, CD247, CD59, CYBA, F2RL1, FAM49B, FCER1G, FOXF1, IL18R1, IL6R, LAT2, LYN, NCKAP1L, NLRP3, NR4A3, PGLYRP3, PIGR, PTPRC, RABGEF1, RASGRP1, RIPK3, SLAMF6, SLC11A1, SYK, TEC, TNF, TNIP1, ZAP70]
GO:0002764	immune response-regulating signaling pathway	GO_BiologicalProcess-EBI-UniProt-GOA_19.01.2019_00h00	7.91958e-05	0.000558106	8.17308	17	[BTK, CD247, CYBA, F2RL1, FCER1G, LAT2, LYN, NCKAP1L, NR4A3, PGLYRP3, PIGR, PTPRC, RABGEF1, SYK, TEC, TNIP1, ZAP70]
GO:0035556	intracellular signal transduction	GO_BiologicalProcess-EBI-UniProt-GOA_19.01.2019_00h00	7.4139e-05	0.000532518	4.2542	81	[ABCA1, ADCY7, ADGRE5, AKAP7, ARHGAP28, BST1, BTK, CASP3, CDC42BPG, CDC42EP5, CDK5R1, CYTH4, DEPDC7, E2F2, ENG, ENTPD5, EPHA7, F2RL1, FGD5, GDF11, GHR, GJA1, GPD1L, GRIN2D, IL10RA, IL18R1, IL6R, ITPR2, LAT2, LCP1, LYN, MAP2K1, MAP2K3, MAP3K13, MAPRE2, MET, NGFR, NLRP12, NLRP3, NOL3, NOS2, NOS3, PAK4, PDE5A, PDGFA, PDGFD, PDGFRA, PDGFRB, PLAUR, PLCH2, PREX1, PTPRC, RAB20, RAB31, RAB38, RAB4A, RAB8…
GO:0050778	positive regulation of immune response	GO_BiologicalProcess-EBI-UniProt-GOA_19.01.2019_00h00	2.9219e-05	0.000256783	6.80628	26	[BTK, CADM1, CD247, CD59, CYBA, F2RL1, FAM49B, FCER1G, IL18R1, IL6R, LAT2, LYN, NCKAP1L, NLRP3, NR4A3, PGLYRP3, PTPRC, RABGEF1, RASGRP1, SLAMF6, SLC11A1, SYK, TEC, TNF, TNIP1, ZAP70]
GO:0002253	activation of immune response	GO_BiologicalProcess-EBI-UniProt-GOA_19.01.2019_00h00	0.000605876	0.00257153	6.88259	17	[BTK, CD247, CD59, CYBA, F2RL1, FCER1G, LAT2, LYN, NCKAP1L, NR4A3, PGLYRP3, PTPRC, RABGEF1, SYK, TEC, TNIP1, ZAP70]
GO:0051247	positive regulation of protein metabolic process	GO_BiologicalProcess-EBI-UniProt-GOA_19.01.2019_00h00	0.00993075	0.0221441	4.0146	44	[CASP3, CDK5R1, CSNK1D, DAB2, ENG, EPHA7, F2RL1, GDF11, GHR, GJA1, IL6R, ITGA5, LYN, MAP2K1, MAP2K3, MAP3K13, MSN, NCKAP1L, NGFR, NLRP3, NUB1, PAK4, PDE5A, PDGFA, PDGFD, PDGFRA, PDGFRB, PLAUR, PSMD14, PTPRC, RASGRP1, RCN3, RIPK3, SLC11A1, SLC27A1, STK10, STK39, TNF, TNFRSF19, TNFSF8, TNIP1, TXN, VEGFC, WWP2]
GO:1902531	regulation of intracellular signal transduction	GO_BiologicalProcess-EBI-UniProt-GOA_19.01.2019_00h00	0.00301828	0.0089827	4.20684	48	[ABCA1, AKAP7, ARHGAP28, BST1, CDK5R1, CYTH4, ENG, ENTPD5, EPHA7, F2RL1, FGD5, GDF11, GHR, GJA1, GPD1L, IL10RA, IL18R1, IL6R, LYN, MAP2K1, MAP2K3, MAP3K13, MAPRE2, MET, NLRP12, NLRP3, NOL3, PAK4, PDE5A, PDGFA, PDGFD, PDGFRA, PDGFRB, PLAUR, PREX1, PTPRC, RABGEF1, RASAL1, RASGRP1, RCN3, RIPK3, RIPOR2, SELP, STK38, TNF, TNFRSF19, TNIP1, ZAP70]
GO:0045937	positive regulation of phosphate metabolic process	GO_BiologicalProcess-EBI-UniProt-GOA_19.01.2019_00h00	0.000739135	0.00301712	4.92476	36	[CDK5R1, DAB2, ENG, ENTPD5, EPHA7, F2RL1, GDF11, GHR, IL6R, ITGA5, LYN, MAP2K1, MAP2K3, MAP3K13, NCKAP1L, NOS2, NOS3, PAK4, PDE5A, PDGFA, PDGFD, PDGFRA, PDGFRB, PID1, PLAUR, PTPRC, RASGRP1, RIPK3, SLC11A1, SLC27A1, STK10, STK39, TNF, TNFRSF19, TXN, VEGFC]
GO:1901700	response to oxygen-containing compound	GO_BiologicalProcess-EBI-UniProt-GOA_19.01.2019_00h00	0.0181226	0.033844	4.12903	32	[ABCA1, ABHD2, ADCY7, CD80, CD86, CDK5R1, COL1A1, DGAT2, GHR, GNAI2, IRF8, LYN, MET, MMP2, MSN, NGFR, NLRP3, NOS2, NOS3, NR4A3, PDGFD, PID1, PLSCR4, RAB8B, RHOQ, RIPK3, SELL, SLC11A1, SLC27A1, STX2, TNF, TXN]
GO:0033993	response to lipid	GO_BiologicalProcess-EBI-UniProt-GOA_19.01.2019_00h00	0.0237072	0.0410888	4.60048	19	[ABCA1, ABHD2, CD80, CD86, DAB2, DGAT2, IRF8, LYN, MSN, NLRP3, NOS2, NOS3, NR4A3, PAQR8, PID1, PLSCR4, PPARD, SLC11A1, TNF]
GO:0071396	cellular response to lipid	GO_BiologicalProcess-EBI-UniProt-GOA_19.01.2019_00h00	0.00786269	0.0187052	5.37975	17	[ABCA1, ABHD2, CD80, CD86, DAB2, DGAT2, IRF8, LYN, MSN, NLRP3, NOS2, NR4A3, PAQR8, PID1, PLSCR4, PPARD, TNF]
GO:0008047	enzyme activator activity	GO_MolecularFunction-EBI-UniProt-GOA_19.01.2019_00h00	0.0179399	0.0335867	4.91329	17	[ADAP1, AHSA2P, ALOX5AP, ARHGAP15, ARHGAP28, ATP1B3, CDK5R1, GNB5, LYN, MAP2K1, NCKAP1L, PSMD14, RASAL1, RASGRP1, SEC23A, SH3PXD2B, TBC1D9]
GO:0044093	positive regulation of molecular function	GO_BiologicalProcess-EBI-UniProt-GOA_19.01.2019_00h00	0.000107447	0.000680194	4.77941	52	[ADAP1, AHSA2P, ALOX5AP, APH1B, ARHGAP15, ARHGAP28, ATP1B3, BDNF, CDK5R1, F2RL1, GNB5, GRHL2, IL18R1, IL1RAP, IL6R, LYN, MAP2K1, MAP2K3, MAP3K13, MAPRE2, MET, NCKAP1L, NGFR, NLRP3, NOS2, NOS3, PAK4, PDE5A, PDGFA, PDGFD, PLAUR, PREX1, PSMD14, PTPRC, RASAL1, RASGRP1, RASGRP2, RCN3, RIPK3, RIPOR2, SEC23A, SH3PXD2B, SLC11A1, SLC27A1, STAC, STK10, STK39, TBC1D9, TCP1, TNF, TNFSF8, TXN]
GO:0050790	regulation of catalytic activity	GO_BiologicalProcess-EBI-UniProt-GOA_19.01.2019_00h00	0.000265809	0.00135074	4.32468	65	[ADAP1, AHSA2P, ALOX5AP, APH1B, ARHGAP15, ARHGAP28, ATP1B3, BAG3, CASP3, CDK5R1, COL7A1, CST7, EPHA7, F2RL1, GNB5, GNG7, GRHL2, IL6R, ITGB3, ITIH2, LYN, MAP2K1, MAP2K3, MAP3K13, MAPRE2, MET, NCKAP1L, NGFR, NLRP12, NLRP3, NOL3, NOS2, NOS3, OAS2, PAK4, PDE5A, PDGFA, PDGFD, PLAUR, PLXNA2, PPP2R2B, PREX1, PSMD14, PTPRC, PTX3, RASAL1, RASGRP1, RASGRP2, RCN3, RIPK3, SEC23A, SERPINB2, SERPINB4, SH3PXD2B…
GO:0060589	nucleoside-triphosphatase regulator activity	GO_MolecularFunction-EBI-UniProt-GOA_19.01.2019_00h00	0.0133286	0.0269824	5.62771	13	[ADAP1, AHSA2P, ARHGAP15, ARHGAP28, ATP1B3, BAG3, GNB5, LYN, NCKAP1L, RASAL1, RASGRP1, SEC23A, TBC1D9]
GO:0043085	positive regulation of catalytic activity	GO_BiologicalProcess-EBI-UniProt-GOA_19.01.2019_00h00	0.000202072	0.0010782	4.95392	43	[ADAP1, AHSA2P, ALOX5AP, APH1B, ARHGAP15, ARHGAP28, ATP1B3, CDK5R1, F2RL1, GNB5, GRHL2, IL6R, LYN, MAP2K1, MAP2K3, MAP3K13, MAPRE2, NCKAP1L, NGFR, NLRP3, NOS2, NOS3, PAK4, PDE5A, PDGFA, PDGFD, PREX1, PSMD14, PTPRC, RASAL1, RASGRP1, RASGRP2, RCN3, RIPK3, SEC23A, SH3PXD2B, SLC11A1, SLC27A1, STK10, STK39, TBC1D9, TCP1, TNF]
GO:0051336	regulation of hydrolase activity	GO_BiologicalProcess-EBI-UniProt-GOA_19.01.2019_00h00	0.00234853	0.00734037	4.53461	38	[ADAP1, AHSA2P, ARHGAP15, ARHGAP28, ATP1B3, COL7A1, CST7, EPHA7, F2RL1, GNB5, ITIH2, LYN, MAPRE2, MET, NCKAP1L, NGFR, NLRP12, NLRP3, NOL3, OAS2, PLAUR, PLXNA2, PPP2R2B, PREX1, PSMD14, PTPRC, PTX3, RASAL1, RASGRP1, RASGRP2, RCN3, RIPK3, SEC23A, SERPINB2, SERPINB4, TBC1D9, TIMP2, TNF]
GO:0051338	regulation of transferase activity	GO_BiologicalProcess-EBI-UniProt-GOA_19.01.2019_00h00	0.0217368	0.0387528	4.26929	26	[CASP3, CDK5R1, GRHL2, IL6R, ITGB3, LYN, MAP2K1, MAP2K3, MAP3K13, NCKAP1L, PAK4, PDE5A, PDGFA, PDGFD, PTPRC, RASGRP1, RIPK3, SLC11A1, SLC27A1, STK10, STK38, STK39, TCP1, TNF, UBASH3B, USP44]
GO:0031098	stress-activated protein kinase signaling cascade	GO_BiologicalProcess-EBI-UniProt-GOA_19.01.2019_00h00	0.00338301	0.00983311	6.66667	13	[CDC42EP5, F2RL1, LYN, MAP2K1, MAP2K3, MAP3K13, PAK4, RASGRP1, ROR2, STK10, STK39, TNF, TNFRSF19]
GO:0051345	positive regulation of hydrolase activity	GO_BiologicalProcess-EBI-UniProt-GOA_19.01.2019_00h00	0.00690239	0.0169608	4.89362	23	[ADAP1, AHSA2P, ARHGAP15, ARHGAP28, ATP1B3, F2RL1, GNB5, LYN, MAPRE2, NCKAP1L, NGFR, NLRP3, PREX1, PSMD14, PTPRC, RASAL1, RASGRP1, RASGRP2, RCN3, RIPK3, SEC23A, TBC1D9, TNF]
GO:0051347	positive regulation of transferase activity	GO_BiologicalProcess-EBI-UniProt-GOA_19.01.2019_00h00	0.00268498	0.00812015	5.48303	21	[CDK5R1, GRHL2, IL6R, LYN, MAP2K1, MAP2K3, MAP3K13, NCKAP1L, PAK4, PDE5A, PDGFA, PDGFD, PTPRC, RASGRP1, RIPK3, SLC11A1, SLC27A1, STK10, STK39, TCP1, TNF]
GO:0030162	regulation of proteolysis	GO_BiologicalProcess-EBI-UniProt-GOA_19.01.2019_00h00	0.0178172	0.0334409	4.54545	22	[CD59, COL7A1, CSNK1D, CST7, DAB2, EPHA7, IL1R2, ITIH2, LYN, NGFR, NLRP12, NLRP3, NOL3, NUB1, PLAUR, PSMD14, RCN3, SERPINB2, SERPINB4, TIMP2, TNF, TNIP1]
GO:0052547	regulation of peptidase activity	GO_BiologicalProcess-EBI-UniProt-GOA_19.01.2019_00h00	0.011496	0.0245357	5.28053	16	[COL7A1, CST7, EPHA7, ITIH2, LYN, NGFR, NLRP12, NLRP3, NOL3, PLAUR, PSMD14, RCN3, SERPINB2, SERPINB4, TIMP2, TNF]
GO:0006928	movement of cell or subcellular component	GO_BiologicalProcess-EBI-UniProt-GOA_19.01.2019_00h00	3.04956e-05	0.000261842	4.75448	61	[ABHD2, ADAMTS9, ANGPT2, ANXA6, BST1, CCBE1, CCDC151, CDK5R1, CNN2, COL1A1, CSF3R, DAB2, DNAH11, ENG, EPHA7, F2RL1, FCER1G, FERMT3, FLRT2, FOXF1, FUZ, GALT, GJA1, ITGA5, ITGB3, ITGB7, KIF13B, LCP1, LOXL2, LYN, MAP2K1, MAPRE2, MCOLN2, MET, MSN, NCKAP1L, NLRP12, NR4A3, PAK4, PDGFA, PDGFD, PDGFRB, PLEKHO1, PLXNA2, PREX1, PSTPIP2, PTPRC, RABGEF1, RASGRP1, RIPK3, RIPOR2, ROR2, SDC4, SELL, SELP, SEMA6B…
GO:0048870	cell motility	GO_BiologicalProcess-EBI-UniProt-GOA_19.01.2019_00h00	1.69231e-07	6.32078e-06	5.75758	57	[ABHD2, ADAMTS9, ANGPT2, ANXA6, BST1, CCBE1, CDK5R1, CNN2, COL1A1, CSF3R, DAB2, DNAH11, ENG, F2RL1, FCER1G, FERMT3, FLRT2, FOXF1, FUZ, GALT, GJA1, ITGA5, ITGB3, ITGB7, LCP1, LOXL2, LYN, MAP2K1, MAPRE2, MCOLN2, MET, MSN, NCKAP1L, NLRP12, NR4A3, PAK4, PDGFA, PDGFD, PDGFRB, PLEKHO1, PLXNA2, PREX1, PSTPIP2, PTPRC, RABGEF1, RIPK3, RIPOR2, ROR2, SDC4, SELL, SELP, SEMA6B, STK10, SUN2, TNF, TWIST2, VEGFC]
GO:0016477	cell migration	GO_BiologicalProcess-EBI-UniProt-GOA_19.01.2019_00h00	3.09123e-08	1.64939e-06	6.15901	55	[ABHD2, ADAMTS9, ANGPT2, ANXA6, BST1, CCBE1, CDK5R1, CNN2, COL1A1, CSF3R, DAB2, ENG, F2RL1, FCER1G, FERMT3, FLRT2, FOXF1, FUZ, GALT, GJA1, ITGA5, ITGB3, ITGB7, LCP1, LOXL2, LYN, MAPRE2, MCOLN2, MET, MSN, NCKAP1L, NLRP12, NR4A3, PAK4, PDGFA, PDGFD, PDGFRB, PLEKHO1, PLXNA2, PREX1, PSTPIP2, PTPRC, RABGEF1, RIPK3, RIPOR2, ROR2, SDC4, SELL, SELP, SEMA6B, STK10, SUN2, TNF, TWIST2, VEGFC]
GO:0051270	regulation of cellular component movement	GO_BiologicalProcess-EBI-UniProt-GOA_19.01.2019_00h00	1.44909e-06	3.49185e-05	6.47359	38	[ABHD2, ADAMTS9, ANGPT2, BST1, CCBE1, CNN2, COL1A1, DAB2, DNAH11, ENG, F2RL1, FERMT3, FLRT2, FOXF1, FUZ, ITGB3, LYN, MAPRE2, MET, MSN, NCKAP1L, NR4A3, PDGFA, PDGFD, PDGFRB, PLXNA2, PTPRC, RABGEF1, RIPK3, RIPOR2, ROR2, SDC4, SELP, SEMA6B, STK10, SUN2, TWIST2, VEGFC]
GO:0050920	regulation of chemotaxis	GO_BiologicalProcess-EBI-UniProt-GOA_19.01.2019_00h00	0.0130009	0.0265346	6.71642	9	[ANGPT2, BST1, F2RL1, LYN, MET, NCKAP1L, RIPOR2, SEMA6B, VEGFC]
GO:0097529	myeloid leukocyte migration	GO_BiologicalProcess-EBI-UniProt-GOA_19.01.2019_00h00	0.0135975	0.0273047	6.66667	9	[BST1, CSF3R, FCER1G, LYN, MCOLN2, NCKAP1L, PREX1, RIPOR2, VEGFC]
GO:0002685	regulation of leukocyte migration	GO_BiologicalProcess-EBI-UniProt-GOA_19.01.2019_00h00	0.000185406	0.00103357	9.67742	12	[BST1, F2RL1, ITGB3, LYN, MSN, NCKAP1L, RABGEF1, RIPK3, RIPOR2, SELP, STK10, VEGFC]
GO:0030334	regulation of cell migration	GO_BiologicalProcess-EBI-UniProt-GOA_19.01.2019_00h00	1.19467e-07	5.2495e-06	7.26916	37	[ABHD2, ADAMTS9, ANGPT2, BST1, CCBE1, CNN2, COL1A1, DAB2, ENG, F2RL1, FERMT3, FLRT2, FOXF1, FUZ, ITGB3, LYN, MAPRE2, MET, MSN, NCKAP1L, NR4A3, PDGFA, PDGFD, PDGFRB, PLXNA2, PTPRC, RABGEF1, RIPK3, RIPOR2, ROR2, SDC4, SELP, SEMA6B, STK10, SUN2, TWIST2, VEGFC]
GO:0002687	positive regulation of leukocyte migration	GO_BiologicalProcess-EBI-UniProt-GOA_19.01.2019_00h00	0.0218389	0.0387497	7.69231	6	[F2RL1, ITGB3, NCKAP1L, RIPOR2, SELP, VEGFC]
GO:0030335	positive regulation of cell migration	GO_BiologicalProcess-EBI-UniProt-GOA_19.01.2019_00h00	5.0116e-06	7.48733e-05	8.12721	23	[CCBE1, COL1A1, DAB2, F2RL1, FERMT3, FOXF1, ITGB3, LYN, MAPRE2, MET, NCKAP1L, NR4A3, PDGFA, PDGFD, PDGFRB, PTPRC, RIPOR2, ROR2, SELP, SEMA6B, SUN2, TWIST2, VEGFC]
GO:1990266	neutrophil migration	GO_BiologicalProcess-EBI-UniProt-GOA_19.01.2019_00h00	0.00851636	0.0199427	8.43373	7	[BST1, CSF3R, FCER1G, MCOLN2, NCKAP1L, PREX1, RIPOR2]
GO:0090022	regulation of neutrophil chemotaxis	GO_BiologicalProcess-EBI-UniProt-GOA_19.01.2019_00h00	0.0150582	0.0292168	15.7895	3	[BST1, NCKAP1L, RIPOR2]
GO:0048646	anatomical structure formation involved in morphogenesis	GO_BiologicalProcess-EBI-UniProt-GOA_19.01.2019_00h00	0.00468853	0.0127822	4.5584	32	[ADAMTS9, ANGPT2, CACNA1A, CCBE1, CDK5R1, COL1A1, E2F2, ELK3, ENG, FOXF1, FUZ, GALT, GRHL2, HK2, ITGA5, KRT19, LOXL2, MAP2K1, MMP2, NGFR, NR4A3, PLEKHO1, PLXNA2, PMP22, RIPOR2, ROR2, SDC4, THBS1, THBS2, TNF, TSPAN12, VEGFC]
GO:0072359	circulatory system development	GO_BiologicalProcess-EBI-UniProt-GOA_19.01.2019_00h00	0.00744679	0.0179444	4.49102	30	[ADAMTS9, ANGPT2, CASP3, CCBE1, COL1A1, COMP, DNAH11, E2F2, ECE2, ELK3, ENG, FLRT2, FOXF1, GALT, GJA1, GRHL2, HK2, IL6R, ITGA5, LOXL2, MAP2K1, MMP2, NGFR, PKP2, SH3PXD2B, SMAD6, THBS1, THBS2, TSPAN12, VEGFC]
GO:0008360	regulation of cell shape	GO_BiologicalProcess-EBI-UniProt-GOA_19.01.2019_00h00	0.000348146	0.00167784	10.4167	10	[ARHGAP15, CDC42EP5, FMNL1, MET, MSN, MYH10, PLEKHO1, PLXNA2, RHOBTB3, RHOQ]
GO:1903706	regulation of hemopoiesis	GO_BiologicalProcess-EBI-UniProt-GOA_19.01.2019_00h00	0.0142492	0.0280849	5.76923	12	[CSF3R, IKZF3, LYN, NCKAP1L, NLRP3, PGLYRP3, PTPRC, RASGRP1, SYK, TNF, UBASH3B, ZAP70]
GO:0001568	blood vessel development	GO_BiologicalProcess-EBI-UniProt-GOA_19.01.2019_00h00	0.00216073	0.00686837	5.38642	23	[ADAMTS9, ANGPT2, CCBE1, COL1A1, COMP, E2F2, ELK3, ENG, FOXF1, GALT, GJA1, HK2, IL6R, ITGA5, LOXL2, MAP2K1, MMP2, NGFR, SMAD6, THBS1, THBS2, TSPAN12, VEGFC]
GO:0010769	regulation of cell morphogenesis involved in differentiation	GO_BiologicalProcess-EBI-UniProt-GOA_19.01.2019_00h00	0.00872966	0.0203783	6.43275	11	[BDNF, CACNA1A, CDK5R1, EPHA7, ITGB3, KIF13B, MAP2K1, MET, PLXNA2, PREX1, SEMA6B]
GO:1901342	regulation of vasculature development	GO_BiologicalProcess-EBI-UniProt-GOA_19.01.2019_00h00	0.00338301	0.00983311	6.66667	13	[ADAMTS9, ANGPT2, CCBE1, E2F2, ENG, HK2, IL6R, ITGA5, NGFR, THBS1, THBS2, TSPAN12, VEGFC]
GO:0001525	angiogenesis	GO_BiologicalProcess-EBI-UniProt-GOA_19.01.2019_00h00	0.0125325	0.026005	5.22876	16	[ADAMTS9, ANGPT2, CCBE1, E2F2, ELK3, ENG, GALT, HK2, ITGA5, LOXL2, MMP2, NGFR, THBS1, THBS2, TSPAN12, VEGFC]
GO:0048514	blood vessel morphogenesis	GO_BiologicalProcess-EBI-UniProt-GOA_19.01.2019_00h00	0.00923165	0.0210245	5.08021	19	[ADAMTS9, ANGPT2, CCBE1, COMP, E2F2, ELK3, ENG, FOXF1, GALT, GJA1, HK2, ITGA5, LOXL2, MMP2, NGFR, THBS1, THBS2, TSPAN12, VEGFC]
GO:0002040	sprouting angiogenesis	GO_BiologicalProcess-EBI-UniProt-GOA_19.01.2019_00h00	0.0172711	0.0327449	8.10811	6	[ADAMTS9, E2F2, ITGA5, LOXL2, NGFR, VEGFC]
GO:0016525	negative regulation of angiogenesis	GO_BiologicalProcess-EBI-UniProt-GOA_19.01.2019_00h00	0.0109382	0.0237525	8.95522	6	[ADAMTS9, ANGPT2, E2F2, NGFR, THBS1, THBS2]
GO:1903670	regulation of sprouting angiogenesis	GO_BiologicalProcess-EBI-UniProt-GOA_19.01.2019_00h00	0.0228917	0.0401411	10.2564	4	[ADAMTS9, E2F2, ITGA5, NGFR]
GO:0007155	cell adhesion	GO_BiologicalProcess-EBI-UniProt-GOA_19.01.2019_00h00	3.69554e-15	2.76057e-12	8.15822	66	[ADAM19, ADAMTS9, ADGRE5, ANGPT2, BCAM, BST1, CASP3, CD80, CD86, CDK5R1, COL1A1, COMP, CYR61, EMILIN2, EPHA7, FAM49B, FAT1, FERMT3, FLRT2, FOXF1, GALT, GRHL2, HAPLN3, IGSF5, IL1RAP, IL6R, ITGA5, ITGA6, ITGB3, ITGB7, LYN, LYVE1, MET, MSN, MYH10, NCKAP1L, NID1, NID2, NLRP3, NOS3, NR4A3, NTNG2, PARVB, PARVG, PCDH1, PDE5A, PKP2, PKP3, PLXNA2, PREX1, PTPRC, RASGRP1, RIPOR2, SDC4, SELL, SELP, SIRPA, SM…
GO:0002250	adaptive immune response	GO_BiologicalProcess-EBI-UniProt-GOA_19.01.2019_00h00	0.00126485	0.00456445	6.43939	17	[ADCY7, BTK, CD3E, CD7, CD8A, FAM49B, FCER1G, IL18R1, IL6R, NLRP3, PTPRC, RIPK3, SLAMF6, SLC11A1, SYK, TEC, TNF]
GO:0098609	cell-cell adhesion	GO_BiologicalProcess-EBI-UniProt-GOA_19.01.2019_00h00	2.30742e-10	4.30911e-08	8.52391	41	[ADAM19, CASP3, CD80, CD86, CDK5R1, COMP, EPHA7, FAM49B, FAT1, FERMT3, FOXF1, IGSF5, IL1RAP, IL6R, ITGA5, ITGB3, ITGB7, LYN, MSN, NCKAP1L, NLRP3, NOS3, NR4A3, NTNG2, PCDH1, PDE5A, PKP2, PKP3, PTPRC, RASGRP1, RIPOR2, SDC4, SELL, SELP, SIRPA, SYK, TNF, TNFAIP8L2, TNIP1, UBASH3B, ZAP70]
GO:0001910	regulation of leukocyte mediated cytotoxicity	GO_BiologicalProcess-EBI-UniProt-GOA_19.01.2019_00h00	0.00182493	0.00600537	11.1111	7	[CADM1, F2RL1, FAM49B, PTPRC, RASGRP1, RIPK3, SLAMF6]
GO:0022407	regulation of cell-cell adhesion	GO_BiologicalProcess-EBI-UniProt-GOA_19.01.2019_00h00	6.62778e-08	3.09435e-06	10.0418	24	[ADAM19, CASP3, CD80, CD86, EPHA7, FAM49B, FERMT3, IL6R, LYN, NCKAP1L, NLRP3, NOS3, NR4A3, PDE5A, PTPRC, RASGRP1, RIPOR2, SDC4, SIRPA, SYK, TNF, TNFAIP8L2, UBASH3B, ZAP70]
GO:0046649	lymphocyte activation	GO_BiologicalProcess-EBI-UniProt-GOA_19.01.2019_00h00	1.32217e-09	1.23457e-07	8.46325	38	[BST1, BTK, CASP3, CD3E, CD80, CD86, CD8A, F2RL1, FAM49B, FCER1G, GJA1, IKZF3, IL18R1, IL6R, IRF2BP2, LAT2, LCP1, LYN, MSN, NCKAP1L, NLRP3, PATZ1, PDE5A, PGLYRP3, PREX1, PTPRC, RASGRP1, RIPK3, RIPOR2, SDC4, SIRPA, SKAP2, SLAMF6, SLC11A1, SYK, TNFAIP8L2, TNFSF8, ZAP70]
GO:0002699	positive regulation of immune effector process	GO_BiologicalProcess-EBI-UniProt-GOA_19.01.2019_00h00	1.74078e-05	0.000175725	10.1351	15	[CADM1, F2RL1, FAM49B, FCER1G, FOXF1, IL18R1, LYN, NLRP3, NR4A3, PTPRC, RABGEF1, RASGRP1, SLAMF6, SYK, TNF]
GO:0006954	inflammatory response	GO_BiologicalProcess-EBI-UniProt-GOA_19.01.2019_00h00	5.81841e-05	0.000439026	6.53266	26	[ADCY7, ALOX5AP, AOAH, BST1, CD163, CD59, CYBA, F2RL1, FCER1G, FOXF1, GALT, IL1R2, LYN, MMP25, NLRP12, NLRP3, NOS2, PPARD, RABGEF1, RASGRP1, SELP, SLC11A1, THBS1, TNF, TNFAIP8L2, TNIP1]
GO:0007159	leukocyte cell-cell adhesion	GO_BiologicalProcess-EBI-UniProt-GOA_19.01.2019_00h00	1.09612e-10	2.72935e-08	12.7451	26	[CASP3, CD80, CD86, FAM49B, FERMT3, IL6R, ITGA5, ITGB7, MSN, NCKAP1L, NLRP3, NOS3, NR4A3, PDE5A, PTPRC, RASGRP1, RIPOR2, SDC4, SELL, SELP, SIRPA, SYK, TNF, TNFAIP8L2, TNIP1, ZAP70]
GO:0007162	negative regulation of cell adhesion	GO_BiologicalProcess-EBI-UniProt-GOA_19.01.2019_00h00	7.07855e-05	0.000513366	9.45946	14	[ANGPT2, CASP3, CD80, CD86, COL1A1, MET, NOS3, PDE5A, PLXNA2, PTPRC, RIPOR2, SDC4, TNFAIP8L2, UBASH3B]
GO:0050866	negative regulation of cell activation	GO_BiologicalProcess-EBI-UniProt-GOA_19.01.2019_00h00	1.47989e-06	3.34994e-05	13.2075	14	[BTK, CASP3, CD80, CD86, FOXF1, LYN, PDE5A, PDGFA, PGLYRP3, RABGEF1, RIPOR2, SDC4, TNFAIP8L2, UBASH3B]
GO:0002703	regulation of leukocyte mediated immunity	GO_BiologicalProcess-EBI-UniProt-GOA_19.01.2019_00h00	7.44444e-06	9.93035e-05	10.8696	15	[CADM1, F2RL1, FAM49B, FCER1G, FOXF1, IL18R1, LYN, NLRP3, PTPRC, RABGEF1, RASGRP1, RIPK3, SLAMF6, SYK, TNF]
GO:0042110	T cell activation	GO_BiologicalProcess-EBI-UniProt-GOA_19.01.2019_00h00	1.73749e-08	9.98389e-07	9.03614	30	[CASP3, CD3E, CD80, CD86, CD8A, F2RL1, FAM49B, FCER1G, GJA1, IL18R1, IL6R, LCP1, MSN, NCKAP1L, NLRP3, PATZ1, PDE5A, PREX1, PTPRC, RASGRP1, RIPK3, RIPOR2, SDC4, SIRPA, SLAMF6, SLC11A1, SYK, TNFAIP8L2, TNFSF8, ZAP70]
GO:0051046	regulation of secretion	GO_BiologicalProcess-EBI-UniProt-GOA_19.01.2019_00h00	0.0059159	0.0149803	5.03433	22	[CACNA1A, CADM1, CYBA, F2RL1, FCER1G, FOXF1, IL1R2, IL1RAP, LYN, NLRP12, NLRP3, NOS2, OAS2, RAB8B, RABGEF1, RASGRP1, SCAMP5, SDC4, SYK, SYT1, SYT11, TNF]
GO:0070201	regulation of establishment of protein localization	GO_BiologicalProcess-EBI-UniProt-GOA_19.01.2019_00h00	0.0154085	0.029819	4.90463	18	[BAG3, CADM1, CCT5, CDK5R1, F2RL1, IL1R2, IL1RAP, LCP1, LYN, NLRP12, NLRP3, NOS2, RABGEF1, RASGRP1, SCAMP5, TCP1, TNF, TXN]
GO:1903037	regulation of leukocyte cell-cell adhesion	GO_BiologicalProcess-EBI-UniProt-GOA_19.01.2019_00h00	7.91613e-07	2.27437e-05	10.4972	19	[CASP3, CD80, CD86, FAM49B, IL6R, NCKAP1L, NLRP3, NOS3, NR4A3, PDE5A, PTPRC, RASGRP1, RIPOR2, SDC4, SIRPA, SYK, TNF, TNFAIP8L2, ZAP70]
GO:1903530	regulation of secretion by cell	GO_BiologicalProcess-EBI-UniProt-GOA_19.01.2019_00h00	0.00795832	0.0188726	5.06329	20	[CACNA1A, CADM1, F2RL1, FCER1G, FOXF1, IL1R2, IL1RAP, LYN, NLRP12, NLRP3, NOS2, RAB8B, RABGEF1, RASGRP1, SCAMP5, SDC4, SYK, SYT1, SYT11, TNF]
GO:0022408	negative regulation of cell-cell adhesion	GO_BiologicalProcess-EBI-UniProt-GOA_19.01.2019_00h00	0.00180475	0.00596524	9.09091	9	[CASP3, CD80, CD86, NOS3, PDE5A, RIPOR2, SDC4, TNFAIP8L2, UBASH3B]
GO:0032729	positive regulation of interferon-gamma production	GO_BiologicalProcess-EBI-UniProt-GOA_19.01.2019_00h00	3.04638e-05	0.00026461	17.7778	8	[FAM49B, IL18R1, IL6R, IRF8, RASGRP1, SLAMF6, SLC11A1, TNF]
GO:0051249	regulation of lymphocyte activation	GO_BiologicalProcess-EBI-UniProt-GOA_19.01.2019_00h00	5.37691e-06	7.5784e-05	8.33333	22	[BST1, BTK, CASP3, CD80, CD86, FAM49B, IKZF3, IL6R, LYN, NCKAP1L, NLRP3, PDE5A, PGLYRP3, PTPRC, RASGRP1, RIPK3, RIPOR2, SDC4, SIRPA, SYK, TNFAIP8L2, ZAP70]
GO:0099024	plasma membrane invagination	GO_BiologicalProcess-EBI-UniProt-GOA_19.01.2019_00h00	0.00307684	0.0090846	13.8889	5	[ABCA1, F2RL1, FCER1G, NCKAP1L, XKR8]
GO:0042098	T cell proliferation	GO_BiologicalProcess-EBI-UniProt-GOA_19.01.2019_00h00	9.62876e-06	0.000119878	11.2903	14	[CASP3, CD80, CD86, GJA1, IL6R, MSN, NCKAP1L, PDE5A, PTPRC, RIPK3, SDC4, SLC11A1, SYK, ZAP70]
GO:0050728	negative regulation of inflammatory response	GO_BiologicalProcess-EBI-UniProt-GOA_19.01.2019_00h00	0.000507101	0.00221523	10.8434	9	[ADCY7, AOAH, FOXF1, IL1R2, NLRP12, NLRP3, PPARD, RABGEF1, TNFAIP8L2]
GO:0009306	protein secretion	GO_BiologicalProcess-EBI-UniProt-GOA_19.01.2019_00h00	0.00559365	0.0144583	5.57377	17	[ABCA1, CADM1, COMP, F2RL1, IL1R2, IL1RAP, LYN, MCOLN2, NLRP12, NLRP3, NOS2, RAB8B, RABGEF1, RASGRP1, RCN3, SCAMP5, TNF]
GO:0002521	leukocyte differentiation	GO_BiologicalProcess-EBI-UniProt-GOA_19.01.2019_00h00	9.58104e-05	0.000633366	6.74487	23	[BTK, CD3E, CD8A, F2RL1, FCER1G, IKZF3, IL18R1, IRF2BP2, LYN, NCKAP1L, NLRP3, PATZ1, PGLYRP3, PREX1, PTPRC, RASGRP1, RIPK3, SLAMF6, SYK, TNF, TNFSF8, UBASH3B, ZAP70]
GO:0045921	positive regulation of exocytosis	GO_BiologicalProcess-EBI-UniProt-GOA_19.01.2019_00h00	0.00167543	0.0056123	13.0435	6	[F2RL1, FCER1G, SCAMP5, SDC4, SYK, SYT1]
GO:0050863	regulation of T cell activation	GO_BiologicalProcess-EBI-UniProt-GOA_19.01.2019_00h00	3.75748e-05	0.000315375	8.67347	17	[CASP3, CD80, CD86, FAM49B, IL6R, NCKAP1L, NLRP3, PDE5A, PTPRC, RASGRP1, RIPK3, RIPOR2, SDC4, SIRPA, SYK, TNFAIP8L2, ZAP70]
GO:0045954	positive regulation of natural killer cell mediated cytotoxicity	GO_BiologicalProcess-EBI-UniProt-GOA_19.01.2019_00h00	0.0173549	0.0328205	15	3	[CADM1, RASGRP1, SLAMF6]

## Sheet: S8b
Table S8b Significantly enriched KEGG pathways of differently expressed and CCGG methylated genes
GOID	GOTerm	Ontology Source	Term PValue	Term PValue Corrected with Benjamini-Hochberg	% Associated Genes	Nr. Genes	Associated Genes Found
KEGG:00620	Pyruvate metabolism	KEGG_19.01.2019	0.0209939	0.0378803	10.5263	4	[ACAT2, LDHA, ME1, ME3]
KEGG:04020	Calcium signaling pathway	KEGG_19.01.2019	0.0214256	0.0382893	5.64103	11	[ADCY7, CACNA1A, ERBB4, GRIN2D, ITPR2, NOS2, NOS3, ORAI2, PDGFRA, PDGFRB, PHKA2]
KEGG:04380	Osteoclast differentiation	KEGG_19.01.2019	0.00418235	0.0117452	7.5188	10	[BTK, CYBA, FOSL2, ITGB3, MAP2K1, SIRPA, SYK, TEC, TNF, TYROBP]
KEGG:04514	Cell adhesion molecules (CAMs)	KEGG_19.01.2019	0.000445337	0.00200402	8.33333	13	[CADM1, CD80, CD86, CD8A, CD99, ITGA6, ITGB7, NTNG2, OCLN, PTPRC, SDC4, SELL, SELP]
KEGG:04650	Natural killer cell mediated cytotoxicity	KEGG_19.01.2019	0.00375466	0.0107461	7.63359	10	[CASP3, CD247, FCER1G, KLRD1, MAP2K1, SH3BP2, SYK, TNF, TYROBP, ZAP70]
KEGG:04750	Inflammatory mediator regulation of TRP channels	KEGG_19.01.2019	0.0242319	0.0418043	6.86275	7	[ADCY7, F2RL1, IL1RAP, ITPR2, LOC511936, LOC530929, MAP2K3]
KEGG:05205	Proteoglycans in cancer	KEGG_19.01.2019	0.000464759	0.00207889	7.57576	15	[CASP3, ERBB4, ITGA5, ITGB3, ITPR2, MAP2K1, MET, MMP2, MSN, NUDT16L1, PLAUR, SDC4, THBS1, TNF, TWIST2]
KEGG:00480	Glutathione metabolism	KEGG_19.01.2019	0.0258997	0.0437716	8.33333	5	[GPX3, GPX7, GSTO1, LAP3, OPLAH]
KEGG:05214	Glioma	KEGG_19.01.2019	0.0206282	0.0374011	7.79221	6	[E2F2, E2F3, MAP2K1, PDGFA, PDGFRA, PDGFRB]
KEGG:00520	Amino sugar and nucleotide sugar metabolism	KEGG_19.01.2019	0.012582	0.0259635	10	5	[GALT, GFPT2, HK2, NPL, PGM3]
KEGG:05146	Amoebiasis	KEGG_19.01.2019	0.0231032	0.0403226	6.93069	7	[CASP3, COL1A1, IL1R2, LAMB1, NOS2, SERPINB4, TNF]
KEGG:04664	Fc epsilon RI signaling pathway	KEGG_19.01.2019	2.3367e-05	0.000226691	14.2857	10	[ALOX5AP, BTK, FCER1A, FCER1G, INPP5D, LYN, MAP2K1, MAP2K3, SYK, TNF]
KEGG:04666	Fc gamma R-mediated phagocytosis	KEGG_19.01.2019	0.0109058	0.0238205	8.04598	7	[ARPC2, HCK, INPP5D, LYN, MAP2K1, PTPRC, SYK]
KEGG:05169	Epstein-Barr virus infection	KEGG_19.01.2019	0.0262082	0.044193	5.28634	12	[BTK, CASP3, CD247, CD3E, E2F2, E2F3, LYN, MAP2K3, OAS2, PSMD14, SYK, TNF]
KEGG:05144	Malaria	KEGG_19.01.2019	0.00546824	0.0142824	10.3448	6	[COMP, MET, SELP, THBS1, THBS2, TNF]
KEGG:04726	Serotonergic synapse	KEGG_19.01.2019	0.00153576	0.00531118	8.62069	10	[CACNA1A, CASP3, GNAI2, GNB5, GNG7, ITPR2, KCNN2, LOC511936, LOC530929, MAP2K1]
KEGG:04730	Long-term depression	KEGG_19.01.2019	0.0258997	0.0437716	8.33333	5	[CACNA1A, GNAI2, ITPR2, LYN, MAP2K1]
KEGG:05163	Human cytomegalovirus infection	KEGG_19.01.2019	0.00922536	0.0210744	5.71429	14	[ADCY7, CASP3, E2F2, E2F3, GNAI2, GNB5, GNG7, IL10RA, IL6R, ITGB3, ITPR2, MAP2K1, PDGFRA, TNF]
KEGG:05167	Kaposi sarcoma-associated herpesvirus infection	KEGG_19.01.2019	0.00536485	0.0141609	6.31068	13	[ANGPT2, CASP3, CD86, E2F2, E2F3, GNB5, GNG7, HCK, ITPR2, LYN, MAP2K1, PREX1, SYK]
KEGG:04926	Relaxin signaling pathway	KEGG_19.01.2019	0.00396395	0.0111738	7.57576	10	[ADCY7, COL1A1, GNAI2, GNB5, GNG7, MAP2K1, MMP2, NOS2, NOS3, VEGFC]
KEGG:04933	AGE-RAGE signaling pathway in diabetic complications	KEGG_19.01.2019	0.0242319	0.0418043	6.86275	7	[CASP3, COL1A1, MMP2, NOS3, THBD, TNF, VEGFC]
KEGG:05200	Pathways in cancer	KEGG_19.01.2019	0.00462382	0.012652	4.85981	26	[ABL1, ADCY7, CASP3, E2F2, E2F3, EPAS1, GNAI2, GNB5, GNG7, GSTO1, IL2RA, IL6R, ITGA6, LAMB1, MAP2K1, MET, MMP2, NOS2, NOTCH2, PDGFA, PDGFRA, PDGFRB, PPARD, RASGRP1, RASGRP2, VEGFC]
KEGG:00240	Pyrimidine metabolism	KEGG_19.01.2019	0.0198153	0.0364581	8.92857	5	[CDA, DCK, ENTPD5, UCK2, UPP1]
KEGG:05418	Fluid shear stress and atherosclerosis	KEGG_19.01.2019	0.00254388	0.00782007	7.58621	11	[CYBA, GSTO1, IL1R2, ITGB3, MMP2, NOS3, PDGFA, SDC4, THBD, TNF, TXN]
KEGG:05133	Pertussis	KEGG_19.01.2019	0.00568541	0.0146448	9.09091	7	[CASP3, GNAI2, IRF8, ITGA5, NLRP3, NOS2, TNF]
KEGG:05145	Toxoplasmosis	KEGG_19.01.2019	0.0139636	0.0277416	7.07965	8	[CASP3, GNAI2, IL10RA, ITGA6, LAMB1, MAP2K3, NOS2, TNF]
KEGG:05218	Melanoma	KEGG_19.01.2019	0.000960165	0.00371628	10.9589	8	[E2F2, E2F3, MAP2K1, MET, PDGFA, PDGFD, PDGFRA, PDGFRB]
KEGG:05230	Central carbon metabolism in cancer	KEGG_19.01.2019	0.0015094	0.00524428	11.4754	7	[HK2, MAP2K1, MET, PDGFRA, PDGFRB, PGAM1, SLC16A3]
KEGG:05340	Primary immunodeficiency	KEGG_19.01.2019	0.00438825	0.012186	12.8205	5	[BTK, CD3E, CD8A, PTPRC, ZAP70]
KEGG:04640	Hematopoietic cell lineage	KEGG_19.01.2019	0.000255952	0.00131859	10	11	[CD3E, CD59, CD7, CD8A, IL1R2, IL2RA, IL6R, ITGA5, ITGA6, ITGB3, TNF]
KEGG:05412	Arrhythmogenic right ventricular cardiomyopathy (ARVC)	KEGG_19.01.2019	0.0117221	0.0248057	8.82353	6	[GJA1, ITGA5, ITGA6, ITGB3, ITGB7, PKP2]
KEGG:04014	Ras signaling pathway	KEGG_19.01.2019	1.52086e-05	0.000155628	8.29876	20	[ABL1, ANGPT2, BDNF, GNB5, GNG7, MAP2K1, MET, NGFR, PAK4, PDGFA, PDGFD, PDGFRA, PDGFRB, PLA2G16, RASAL1, RASGRP1, RASGRP2, RGL1, VEGFC, ZAP70]
KEGG:04015	Rap1 signaling pathway	KEGG_19.01.2019	0.000855774	0.00338235	7.14286	15	[ADCY7, ANGPT2, GNAI2, ITGB3, MAP2K1, MAP2K3, MET, NGFR, PDGFA, PDGFD, PDGFRA, PDGFRB, RASGRP2, THBS1, VEGFC]
KEGG:05206	MicroRNAs in cancer	KEGG_19.01.2019	0.0199937	0.0364276	5.18518	14	[ABL1, CASP3, E2F2, E2F3, ITGA5, ITGB3, MAP2K1, MET, NOTCH2, PAK4, PDGFA, PDGFRA, PDGFRB, THBS1]
KEGG:04072	Phospholipase D signaling pathway	KEGG_19.01.2019	0.00956415	0.0215843	6.66667	10	[ADCY7, CYTH4, FCER1A, FCER1G, MAP2K1, PDGFA, PDGFD, PDGFRA, PDGFRB, SYK]
KEGG:04540	Gap junction	KEGG_19.01.2019	4.11911e-05	0.000330857	12.2222	11	[ADCY7, CSNK1D, GJA1, GNAI2, ITPR2, MAP2K1, PDGFA, PDGFD, PDGFRA, PDGFRB, TUBB6]
KEGG:05215	Prostate cancer	KEGG_19.01.2019	0.00510418	0.0136172	8.42105	8	[E2F2, E2F3, IL1R2, MAP2K1, PDGFA, PDGFD, PDGFRA, PDGFRB]
KEGG:04660	T cell receptor signaling pathway	KEGG_19.01.2019	0.000612269	0.00258398	9.70874	10	[CD247, CD3E, CD8A, MAP2K1, PAK4, PTPRC, RASGRP1, TEC, TNF, ZAP70]
KEGG:04151	PI3K-Akt signaling pathway	KEGG_19.01.2019	7.38598e-07	2.29889e-05	7.7748	29	[ANGPT2, BDNF, COL1A1, COL9A1, COMP, ERBB4, GHR, GNB5, GNG7, IL2RA, IL6R, ITGA5, ITGA6, ITGB3, ITGB7, LAMB1, MAP2K1, MET, NGFR, NOS3, PDGFA, PDGFD, PDGFRA, PDGFRB, PPP2R2B, SYK, THBS1, THBS2, VEGFC]
KEGG:04510	Focal adhesion	KEGG_19.01.2019	7.53687e-07	2.25202e-05	10.101	20	[COL1A1, COL9A1, COMP, ITGA5, ITGA6, ITGB3, ITGB7, LAMB1, MAP2K1, MET, PAK4, PARVB, PARVG, PDGFA, PDGFD, PDGFRA, PDGFRB, THBS1, THBS2, VEGFC]
KEGG:04512	ECM-receptor interaction	KEGG_19.01.2019	1.90483e-05	0.000189721	13.253	11	[COL1A1, COL9A1, COMP, ITGA5, ITGA6, ITGB3, ITGB7, LAMB1, SDC4, THBS1, THBS2]
KEGG:04810	Regulation of actin cytoskeleton	KEGG_19.01.2019	0.00628207	0.0156424	6.19048	13	[ARPC2, ITGA5, ITGA6, ITGB3, ITGB7, MAP2K1, MSN, NCKAP1L, PAK4, PDGFA, PDGFD, PDGFRA, PDGFRB]
KEGG:04010	MAPK signaling pathway	KEGG_19.01.2019	0.000591737	0.00252587	6.50685	19	[ANGPT2, BDNF, CACNA1A, CASP3, ERBB4, IL1RAP, MAP2K1, MAP2K3, MAP3K13, MET, NGFR, PDGFA, PDGFD, PDGFRA, PDGFRB, RASGRP1, RASGRP2, TNF, VEGFC]
KEGG:05219	Bladder cancer	KEGG_19.01.2019	0.00669848	0.0165141	11.6279	5	[E2F2, E2F3, MAP2K1, MMP2, THBS1]
